# Supplementary material for: Global, regional, and national prevalence of HIV-1 drug resistance in treatment-naive and treatment-experienced children and adolescents: a systematic review and meta-analysis
Source: PubMed Central journal article supplement — eClinicalMedicine. 2024 Oct 4;77:102859. doi: 10.1016/j.eclinm.2024.102859 (PMC11490817; doi:10.1016/j.eclinm.2024.102859), 2024-10-04
Supplement: mmc1.pdf [file mmc1.pdf]

## Supplementary Material

**Table S1: Search strategy-page 2**

**Table S2: Countries included in analysis listed by income level – page 3-7**

**Table S3A: PICO summary of included studies for treatment-naive children prevalence analysis – page 8-15**

**Table S3B: PICO summary of included studies for treatment-experienced children prevalence analysis – page 16-33**

**Table S4A: Quality assessment of included DR studies for treatment-naive children prevalence analysis – page 34- 35**

**Table S4B: Quality assessment of included DR studies for treatment-experienced children prevalence analysis – page 36-37**

**Table S5A: Pooled prevalence of drug resistance among treatment-naive children after 2015. – page 38**

**Table S5B: Pooled prevalence of drug resistance among treatment-experienced children after 2015. – page 39**

**Table S6A: Meta regression analysis for the variation of the prevalence of naive HIV-infected children – page 40**

**Table S6B: Meta regression analysis for the variation of the prevalence of treated HIV-infected children – page 41**

**Figure S1: Demonstration of countries and regions included in the study – page 42**

**Figure S2A: Forest plot of the drug resistance prevalence among treatment-naive groups – page 43**

**Figure S2B: Forest plot of the drug resistance prevalence among treatment-experienced groups – page 44**

**Figure S3A: Sensitivity analysis for the variation of the prevalence of naive HIV-infected children – page 45**

**Figure S3B: Sensitivity analysis for the variation of the prevalence of treated HIV-infected children – page 46**

**Figure S4A: Forest plot of the NNRTI mutation prevalence among treatment-naive groups – page 47**

**Figure S4B: Forest plot of the NNRTI mutation prevalence among treatment-experienced groups – page 48**

**Figure S5A: Forest plot of the NRTI mutation prevalence among treatment-naive group – page 49**

**Figure S5B: Forest plot of the NRTI mutation prevalence among treatment-experienced group – page 50**

**Figure S6A: Forest plot of the PI mutation prevalence among treatment-naive group – page 51**

**Figure S6B: Forest plot of the PI mutation prevalence among treatment-experienced group – page 52**

**Figure S7A: Forest plot of the INSTI mutation prevalence among treatment-naive group – page 53**

**Figure S7B: Forest plot of the INSTI mutation prevalence among treatment-experienced group – page 54**

**Figure S8A: Forest plot of the dual-class mutation prevalence among treatment-naive group – page 55**

**Figure S8B: Forest plot of the dual-class mutation prevalence among treatment-naive group – page 56**

**Figure S9A: Forest plot of the triple-class mutation prevalence among treatment-naive group – page 57**

**Figure S9B: Forest plot of the triple-class mutation prevalence among treatment-experienced group – page 58**

**PRISMA Checklist – page 59-60**

**Table S1: Search strategy**

| Database       | Search strategy                                                                                                                                                                                                                                                                                                                                                                                                                                                                                                                         | Results |
|----------------|-----------------------------------------------------------------------------------------------------------------------------------------------------------------------------------------------------------------------------------------------------------------------------------------------------------------------------------------------------------------------------------------------------------------------------------------------------------------------------------------------------------------------------------------|---------|
| PubMed         | ((("resistan*"[Title]) AND ("HIV"[Title] OR "human immunodeficiency virus"[Title] OR "AIDS"[Title] OR "acquired immunodeficiency syndrome"[Title]) AND ("child*"[Title/Abstract] OR "adolecen*"[Title/Abstract] OR "infant*"[Title/Abstract] OR "newborn*"[Title/Abstract] OR "pediatri*"[Title/Abstract]) ) NOT ("Case Reports"[Publication Type] OR "Comment"[Publication Type] OR "Editorial"[Publication Type] OR "Review"[Publication Type] OR "Meta-analysis"[Publication Type])) AND (humans[Filter]))<br><br>up to 28 June 2024 | 461     |
| Embase         | ('hiv'/exp OR 'aids'/exp OR hiv:ti OR 'human immunodeficiency virus':ti OR aids:ti OR 'acquired immunodeficiency syndrome':ti) AND resistan*:ti AND (child*:ab,ti OR adolescent*:ab,ti OR infant*:ab,ti OR newborn*:ab,ti OR pediatri*:ab,ti) AND [article]/lim AND [humans]/lim AND [english]/lim<br><br>up to 28 June 2024                                                                                                                                                                                                            | 945     |
| Web Of Science | TI=(resistan*) AND (TI=(child* or adolescen* or infan* or newborn* or pediatri*) OR AB=(child* or adolescen* or infan* or newborn* or pediatri*)) AND TI=(aids OR "acquired immunodeficiency syndrome" OR HIV OR "human immunodeficiency virus")<br><br>up to 28 June 2024                                                                                                                                                                                                                                                              | 876     |

**Table S2: Countries included in analysis listed by income level**  
(In the order of data extraction process)

| First author          | Study performed country | Region                     | World Bank Income level | Median sampling year | Age (month) |
|-----------------------|-------------------------|----------------------------|-------------------------|----------------------|-------------|
| Lindström, 2010       | Malawi                  | Southern Africa            | Low income              | 2007                 | 3.3         |
| Lindström, 2010       | Malawi                  | Southern Africa            | Low income              | 2007                 | 3.3         |
| Towler, 2010          | Uganda                  | Eastern Africa             | Low income              | 2005                 | 51.5        |
| Towler, 2008          | Uganda                  | Eastern Africa             | Low income              | /                    | 1.4         |
| Fogel, 2011           | Malawi                  | Southern Africa            | Low income              | 2008                 | 3           |
| Van Dyke, 2016        | United States           | North America              | High income             | 2011                 | 37.2        |
| Kurle, 2007           | India                   | Asia                       | Lower middle income     | /                    | 0.7         |
| Kurle, 2007           | India                   | Asia                       | Lower middle income     | /                    | 6           |
| Vignoles, 2009        | Argentina               | South America              | Upper middle income     | 2005                 | 51.2        |
| Gibb, 2002            | UK, Italy, Spain        | Europe                     | /                       | 1999                 | 6           |
| Nelson, 2015          | Malawi                  | Southern Africa            | Low income              | 2007                 | 3.62        |
| Nelson, 2015          | Malawi                  | Southern Africa            | Low income              | 2007                 | 3.62        |
| Nelson, 2015          | Malawi                  | Southern Africa            | Low income              | 2007                 | 8.63        |
| Louis, 2019           | Haiti                   | North America              | Lower middle income     | 2013                 | 6.5         |
| Boerma, 2016          | Nigeria                 | Western and Central Africa | Lower middle income     | 2012                 | 57.6        |
| Bennett, 2020         | Zambian                 | Southern Africa            | Lower middle income     | 2017                 | 5           |
| Inzaule, 2018         | Nigeria                 | Western and Central Africa | Lower middle income     | 2015                 | 5.1         |
| Crowell, 2017         | Mali                    | Western and Central Africa | Low income              | 2012                 | 31.2        |
| Salou, 2016           | Togo                    | western and Central Africa | Low income              | 2012                 | 5           |
| Kityo, 2016           | Uganda                  | Eastern Africa             | Low income              | 2010                 | 58.8        |
| Dow, 2017             | Tanzania                | Eastern Africa             | Lower middle income     | 2013                 | 3.73        |
| Hunt, 2011            | Southern Africa         | Southern Africa            | Upper middle income     | 2006                 | 24          |
| Zeh, 2011             | Kenya                   | Eastern Africa             | Lower middle income     | 2005                 | 6           |
| Nii-Trebi, 2013       | Ghana                   | Western and Central Africa | Lower middle income     | 2009                 | 60          |
| Neubert, 2016         | Germany                 | Europe                     | High income             | 2005                 | 24          |
| Taylor, 2011          | Southern Africa         | Southern Africa            | Upper middle income     | 2005                 | 8           |
| Fofana, 2023          | Mali and Benin          | Western and Central Africa | /                       | 2019                 | 31.2        |
| Hunt, 2019            | Southern Africa         | Southern Africa            | Upper middle income     | 2012                 | 1.2         |
| Parker, 2003          | United States           | North America              | High income             | 1998                 | 3           |
| Parker, 2003          | United States           | North America              | High income             | 1998                 | 3           |
| Karchava, 2006        | United States           | North America              | High income             | 2001                 | 6           |
| Frange, 2018          | France                  | Europe                     | High income             | 2012                 | 26          |
| Ngo-Giang-Huong, 2016 | Europe and Thailand     | Asia                       | /                       | 2003                 | 79.2        |
| Tadesse, 2019         | Ethiopia                | Eastern Africa             | Low income              | 2018                 | 108         |
| Jordan, 2022          | Namibia                 | Southern Africa            | Upper middle income     | 2016                 | 18          |
| Soeria-Atmadja, 2020  | Ugandan                 | Eastern Africa             | Low income              | 2015                 | 74.4        |
| Aulicino, 2019        | Argentina               | South America              | Upper middle income     | 2010                 | 2.3         |

|                              |                                                                                                |                            |                     |      |      |
|------------------------------|------------------------------------------------------------------------------------------------|----------------------------|---------------------|------|------|
| Abidi, 2021                  | Pakistan                                                                                       | Asia                       | Lower middle income | 2019 | 36   |
| Kovacs, 2005                 | United States                                                                                  | North America              | High income         | /    | 2.6  |
| Delaugerre, 2009             | France                                                                                         | Europe                     | High income         | 2001 | 0.97 |
| Ikomey, 2017                 | Cameroon                                                                                       | Western and Central Africa | Lower middle income | 2015 | 30   |
| de Andrade, 2017             | Brazil                                                                                         | South America              | Upper middle income | 2013 | 44.4 |
| Kuhn, 2015                   | Southern Africa                                                                                | Southern Africa            | Upper middle income | 2011 | 4.43 |
| Kuhn, 2015                   | Southern Africa                                                                                | Southern Africa            | Upper middle income | 2011 | 24   |
| Fokam, 2011                  | Cameroon                                                                                       | Western and Central Africa | Lower middle income | 2010 | 72   |
| Han, 2009                    | China                                                                                          | Asia                       | Upper middle income | 2006 | 6    |
| Eshleman, 2001               | Uganda                                                                                         | Eastern Africa             | Low income          | 2000 | 1.63 |
| Martinson, 2007              | Southern Africa                                                                                | Southern Africa            | Upper middle income | 2002 | 6    |
| Vaz, 2012                    | Mozambique                                                                                     | Southern Africa            | Low income          | 2008 | 25.2 |
| Olusola, 2021                | Nigeria                                                                                        | Western and Central Africa | Lower middle income | 2016 | 76.8 |
| Guimarães, 2015              | Brazil                                                                                         | South America              | Upper middle income | 2013 | 108  |
| Masquelier, 2001             | France                                                                                         | Europe                     | High income         | 1995 | 6    |
| Jordan, 2017                 | 5 sub-Saharan African countries (Mozambique, Swaziland, Southern Africa, Uganda, and Zimbabwe) | Southern Africa            |                     | 2012 | 4    |
| Jordan, 2017                 | Mozambique                                                                                     | Southern Africa            | Low income          | 2012 | 4    |
| Jordan, 2017                 | Swaziland                                                                                      | Southern Africa            | Lower middle income | 2012 | 4    |
| Jordan, 2017                 | Uganda                                                                                         | Eastern Africa             | Low income          | 2012 | 4    |
| Jordan, 2017                 | Zimbabwe                                                                                       | Southern Africa            | Lower middle income | 2012 | 4    |
| Yeganeh, 2018                | Southern Africa, Brazil, Argentina                                                             | South America              | Upper middle income | 2008 | 3    |
| Neogi, 2012                  | India                                                                                          | Asia                       | Lower middle income | 2009 | 96   |
| de Azevedo, 2022             | Brazil                                                                                         | South America              | Upper middle income | 2004 | 6    |
| de Azevedo, 2022             | Brazil                                                                                         | South America              | Upper middle income | 2010 | 12   |
| Rogo, 2015                   | United States                                                                                  | North America              | High income         | 2001 | 180  |
| Chalermchockcharoenkit, 2009 | Thailand                                                                                       | Asia                       | Upper middle income | 2002 | 1    |
| Phung, 2015                  | Vietnam                                                                                        | Asia                       | Lower middle income | 2010 | 50   |
| Antunes, 2015                | Mozambique                                                                                     | Southern Africa            | Low income          | 2011 | 7    |
| Almeida, 2009                | Brazil                                                                                         | South America              | Upper middle income | 2002 | 21.5 |
| Fogel, 2013                  | Southern Africa, Tanzania, Uganda, and Zimbabwe                                                | Southern Africa            | /                   | 2012 | 18   |
| Chaix, 2007                  | Côte d'Ivoire                                                                                  | Western and Central Africa | Lower middle income | 2006 | 3    |
| Jarchi, 2019                 | Iran                                                                                           | Asia                       | Lower middle income | 2017 | 144  |
| Green, 2006                  | Italy, Brazil, UK, Spain, Germany, Portugal                                                    | Europe                     | /                   | 2001 | 114  |
| Boender, 2016                | Uganda                                                                                         | Eastern Africa             | Low income          | 2010 | 64.8 |
| Towler, 2010                 | Uganda                                                                                         | Eastern Africa             | Low income          | 2005 | /    |
| Kamori, 2023                 | Tanzania                                                                                       | Eastern Africa             | Lower middle income | 2020 | 120  |

|                       |                                   |                            |                     |      |       |
|-----------------------|-----------------------------------|----------------------------|---------------------|------|-------|
| Coetzer, 2013         | Cambodia                          | Asia                       | Lower middle income | 2007 | 96    |
| Rossouw, 2015         | Southern Africa                   | Southern Africa            | Upper middle income | 2010 | 56.3  |
| Chaix, 2005           | Côte d'Ivoire                     | Western and Central Africa | Lower middle income | 2002 | 76.2  |
| Machado, 2004         | Brazil                            | South America              | Upper middle income | 2000 | 7.6   |
| Rodríguez-Galet, 2023 | Equatorial Guinea                 | Western and Central Africa | Upper middle income | 2020 | 6     |
| Rubio-Garrido, 2021   | the Democratic Republic of Congo  | Western and Central Africa | Low income          | 2017 | 48    |
| Tadesse, 2018         | Southern Ethiopia                 | Eastern Africa             | Low income          | 2016 | 144   |
| Mossoro-Kpinde, 2017  | the Central African Republic      | Western and Central Africa | Low income          | 2013 | 144   |
| Kebe, 2013            | Senegalese                        | Western and Central Africa | Lower middle income | 2010 | 84    |
| Crowell, 2017         | Mali                              | Western and Central Africa | Low income          | 2012 | 31.2  |
| Stoddart, 2014        | Southern African                  | Southern Africa            | Upper middle income | 2011 | 96    |
| Aboulker, 2004        | France, Spain, Germany, Italy, UK | Europe                     | /                   | 2000 | 2.5   |
| Puthanakit, 2010      | Thailand                          | Asia                       | Upper middle income | 2005 | 109.2 |
| Nyandiko, 2022        | Kenya                             | Asia                       | Lower middle income | 2011 | 96    |
| Taylor, 2011          | Southern Africa.                  | Southern Africa            | Upper middle income | 2005 | 7.3   |
| Fofana, 2023          | Mali and Benin                    | Western and Central Africa | /                   | 2019 | 120   |
| Contreras, 2013       | United States                     | North America              | High income         | 2003 | 75.6  |
| Delaugerre, 2007      | France                            | Europe                     | High income         | 2002 | 144   |
| Agwu, 2014            | United States, Puerto Rico        | North America              | /                   | 2006 | 121.2 |
| Inzaule, 2016         | Kenya                             | Eastern Africa             | Lower middle income | 2006 | 6     |
| Kityo, 2017           | Uganda                            | Eastern Africa             | Low income          | 2010 | 58.8  |
| Soeria-Atmadja, 2020  | Ugandan                           | Eastern Africa             | Low income          | 2015 | 74.4  |
| Jittamala, 2009       | Thailand                          | Asia                       | Upper middle income | 2004 | 85.2  |
| Abidi, 2021           | Pakistan                          | Asia                       | Lower middle income | 2019 | 36    |
| Chohan, 2015          | Kenya                             | Eastern Africa             | Lower middle income | 2008 | 45.6  |
| Shet, 2013            | India                             | Asia                       | Lower middle income | 2009 | 120   |
| Theodore, 2011        | Ugandan                           | Eastern Africa             | Low income          | 2010 | 64.8  |
| Yan, 2022             | China                             | Asia                       | Upper middle income | 2020 | 84    |
| Zhao, 2011            | China                             | Asia                       | Upper middle income | 2007 | 166.8 |
| Bratholm, 2010        | Tanzanian                         | Eastern Africa             | Lower middle income | 2009 | 60    |
| Gupta, 2010           | Zambian                           | Southern Africa            | Lower middle income | 2004 | 94.8  |
| Beghin, 2020          | Southern African                  | Southern Africa            | Upper middle income | 2008 | 8.6   |
| Beghin, 2020          | Southern African                  | Southern Africa            | Upper middle income | 2008 | 54    |
| Ventosa-Cubillo, 2023 | Panama                            | South America              | High income         | 2018 | 144   |
| Muri, 2017            | Tanzania                          | Eastern Africa             | Lower middle income | 2016 | 132   |
| Vaz, 2018             | Mozambique                        | Southern Africa            | Low income          | 2013 | 103   |
| Makadzange, 2015      | Zimbabwe                          | Southern Africa            | Lower middle income | 2012 | 136.8 |
| Yendewa, 2021         | Sierra Leone                      | Western and Central Africa | Low income          | 2019 | 108   |
| Brice, 2020           | Mali                              | Western and Central Africa | Low income          | 2013 | 118.8 |
| Vaz, 2009             | Mozambique                        | Southern Africa            | Low income          | 2005 | 49    |
| Sylla, 2019           | Mali                              | Western and Central Africa | Low income          | 2013 | 150   |

|                         |                                                 |                                        |                     |      |       |
|-------------------------|-------------------------------------------------|----------------------------------------|---------------------|------|-------|
| Vaz, 2012               | Mozambique                                      | Southern Africa                        | Low income          | 2008 | 25.2  |
| Brindeiro, 2002         | Brazil                                          | South America                          | Upper middle income | 1999 | 68.28 |
| Adje-Toure, 2008        | Côte d'Ivoire                                   | Western and Central Africa             | Lower middle income | 2001 | 84    |
| Tagnouokam Ngoupo, 2021 | Cameroon                                        | Western and Central Africa             | Lower middle income | 2009 | 4.2   |
| Amani-Bossé, 2017       | Burkina Faso, Côte d'Ivoire                     | Western and Central Africa             | /                   | 2012 | 13.9  |
| Ahoua, 2011             | Uganda                                          | Eastern Africa                         | Low income          | 2006 | 64.8  |
| Ahoua, 2011             | Uganda                                          | Eastern Africa                         | Low income          | 2006 | 66    |
| Mutwa, 2014             | Rwanda                                          | Eastern Africa                         | Low income          | 2010 | 129.6 |
| Rogo, 2015              | United States                                   | North America                          | High income         | 2001 | /     |
| Mulder, 2011            | Spain                                           | Europe                                 | High income         | 2001 | 182.4 |
| Fitzgibbon, 2001        | United States                                   | North America                          | High income         | 2004 | 94.8  |
| Francesca, 2019         | Switzerland                                     | Europe                                 | High income         | 1999 | 168   |
| Ross, 2015              | North America, Europe and Southern Africa       | North America, Europe, Southern Africa | /                   | 2007 | 108   |
| Ross, 2015              | Southern Africa, Mexico, Argentina and Portugal | Southern Africa, North America, Europe | /                   | 2007 | 16    |
| Lwembe, 2007            | Kenya                                           | Eastern Africa                         | Lower middle income | 2003 | 90    |
| Al Hajjar, 2012         | Saudi Arab                                      | Asia                                   | High income         | 2008 | 84    |
| Makatini, 2019          | Southern Africa                                 | Southern Africa                        | Upper middle income | 2014 | 96    |
| Camara-Cissé, 2021      | Côte d'Ivoire                                   | Western and Central Africa             | Lower middle income | 2012 | 132   |
| Dumans, 2009            | Brazil                                          | South America                          | Upper middle income | 2002 | 80.4  |
| Fokam, 2011             | Cameroon                                        | Western and Central Africa             | Lower middle income | 2010 | 72    |
| Green, 2012             | Southern Africa                                 | Southern Africa                        | Upper middle income | 2009 | 94.8  |
| Pillay, 2014            | Southern Africa                                 | Southern Africa                        | Upper middle income | 2012 | 122.4 |
| Hunt, 2023              | Southern Africa                                 | Southern Africa                        | Upper middle income | 2018 | 154.8 |
| Fofana, 2018            | Benin                                           | Western and Central Africa             | Lower middle income | 2016 | 120   |
| Servais, 2002           | Belgian                                         | Europe                                 | High income         | 1999 | 114   |
| Ramkissoon, 2015        | Jamaica                                         | North America                          | Upper middle income | 2015 | 120   |
| Saravanan, 2017         | India                                           | Asia                                   | Lower middle income | 2012 | 109.2 |
| Bismara, 2012           | Brazil                                          | South America                          | Upper middle income | 2012 | 90    |
| Khanh Thu et al(2024)   | Vietnam                                         | Asia                                   | Lower middle income | 2019 | 2     |
| Lehman et al(2015)      | Kenya, America                                  | Africa, North America                  | /                   | 2007 | 4.7   |
| Fisher et al(2015)      | Southern Africa                                 | Southern Africa                        | Upper middle income | 2008 | 3.4   |
| Ronen et al(2017)       | Kenya                                           | Eastern Africa                         | Lower middle income | 2007 | 6     |
| Fokam et al(2018)       | Cameroon                                        | Western and Central Africa             | Lower middle income | 2015 | 72    |
| Abuogi et al(2023)      | Kenya                                           | Eastern Africa                         | Lower middle income | 2020 | 9     |
| Djiyou et al(2023)      | Cameroon                                        | Western and Central Africa             | Lower middle income | 2021 | 192   |
| Khamadi et al(2023)     | Tanzania                                        | Eastern Africa                         | Lower middle income | 2020 | 144   |
| Charpentier et al(2012) | the Central African Republic                    | Western and Central Africa             | Low income          | 2009 | 96    |
| Bouassa et al(2019)     | the Central African Republic                    | Western and Central Africa             | Low income          | 2008 | 132   |

|                       |                                                  |                 |                     |      |     |
|-----------------------|--------------------------------------------------|-----------------|---------------------|------|-----|
| Pang et al(2024)      | China                                            | Asia            | Upper middle income | 2024 |     |
| Sivay et al(2024)     | Russia                                           | Europe          | Upper middle income | 2020 | 60  |
| Tambuyzer et al(2016) | Thailand, Argentina, United States, South Africa | /               | /                   | 2010 | 144 |
| Lange et al(2015)     | South Africa                                     | Southern Africa | Upper middle income | 2015 | 8   |
| Gopalan et al(2019)   | India                                            | Asia            | Lower middle income | 2014 | 96  |
| Szubert et al(2017)   | Uganda, Zimbabwe                                 | /               | /                   | 2008 | 72  |

**Table S3A: PICO Summary of included studies for treatment-naive children prevalence analysis**

| Study               | Patient/Population                                                                                                                                                 | Intervention                                                                                                                                                            | Comparison                                                                                                                                             | Outcome                                                                                                                       |
|---------------------|--------------------------------------------------------------------------------------------------------------------------------------------------------------------|-------------------------------------------------------------------------------------------------------------------------------------------------------------------------|--------------------------------------------------------------------------------------------------------------------------------------------------------|-------------------------------------------------------------------------------------------------------------------------------|
| J. Lidstrom, 2010   | Infant patients with utero HIV-1 infection                                                                                                                         | 6 weeks of PMTCT drugs: sdNVP+AZT                                                                                                                                       | 6 weeks of PMTCT drugs: sdNVP+AZT+NVP                                                                                                                  | Overall HIV-1 pretreatment drug resistance                                                                                    |
| J. Lidstrom, 2010   | Infants infected with HIV in utero in Malawi, aged 0 to 14 weeks                                                                                                   | 6 weeks of PMTCT drugs: sdNVP+AZT                                                                                                                                       | 6 weeks of PMTCT drugs: sdNVP+AZT+NVP                                                                                                                  | Overall HIV-1 pretreatment drug resistance                                                                                    |
| J. Lidstrom, 2010   | Infants infected with HIV in utero in Malawi, aged 0 to 14 weeks                                                                                                   | 6 weeks of PMTCT drugs: sdNVP+AZT+NVP                                                                                                                                   | 6 weeks of PMTCT drugs: sdNVP+AZT                                                                                                                      | Overall HIV-1 pretreatment drug resistance                                                                                    |
| W. I. Towler, 2010  | HIV-infected children in Uganda                                                                                                                                    | sdNVP to prevent MTCT exposure; d4T+3TC+NVP                                                                                                                             | Children previously exposed to sdNVP compared with those who were not exposed                                                                          | Overall HIV-1 pretreatment drug resistance, specific mutation resistance prevalence                                           |
| J. D. Church, 2008  | Newborn infants in Uganda from 2005 to 2008                                                                                                                        | PMTCT drugs:sdNVP at birth for the infant and the mother in labor, extended NVP prophylaxis up to 6 weeks of age for the infant                                         | Control Group: Infants who received sdNVP only<br>Intervention Group: Infants who received sdNVP plus daily NVP up to 6 weeks of age                   | Overall HIV-1 pretreatment drug resistance, different regimens resistance prevalence, specific mutation resistance prevalence |
| J. Fogel, 2011      | Neonates to 14-week-old infants in Malawi                                                                                                                          | 36 weeks of PMTCT drugs: extended NVP arm for infants. sdNVP+ZDV for 1 week, sdNVP+NVP up to 14 weeks of age, sdNVP+NVP+ZDV up to 14 weeks of age                       | Infants receiving sdNVP +ZDV for 1 week                                                                                                                | Overall HIV-1 pretreatment drug resistance, different regimens resistance prevalence, specific mutation resistance prevalence |
| R. B. V. Dyke, 2016 | Children and adolescents in the United States with perinatal HIV infection, enrolled in the study between 2007 and 2009                                            | NRTI/PI/NNRTI/ EI/FI/ INSTI                                                                                                                                             | Reference laboratory overall antiretroviral resistance rates                                                                                           | Overall HIV-1 pretreatment drug resistance, different regimens resistance prevalence, specific mutation resistance prevalence |
| S. N. Kurle, 2007   | Neonates infected with HIV-1 subtype C in India within 48 hours and 2 months of birth                                                                              | neonates exposed to sdNVP for PMTCT of HIV                                                                                                                              | Neonates infected with HIV-1 subtype C not exposed to SD-NVP (hypothetical control group)                                                              | Overall HIV-1 pretreatment drug resistance, specific mutation resistance prevalence                                           |
| S. N. Kurle, 2007   | Neonates infected with HIV-1 subtype C in India within 48 hours and 2 months of birth                                                                              | neonates exposed to sdNVP for PMTCT of HIV                                                                                                                              | Neonates infected with HIV-1 subtype C not exposed to SD-NVP (hypothetical control group)                                                              | Overall HIV-1 pretreatment drug resistance, specific mutation resistance prevalence                                           |
| M. Vignoles, 2009   | Vertically HIV-1-infected children in Argentina, aged 0 to 17 years, newly diagnosed and initiating their first HAART regimen between December 2004 and July 2006. | Administration of HAART, including various combinations of antiretroviral drugs, with some children receiving maternal/infant ARV prophylaxis: AZT, AZT+sdNVP           | Not explicitly mentioned in the study, but the baseline characteristics of the patients (prior to HAART initiation) can serve as a form of comparison. | Specific mutation resistance prevalence                                                                                       |
| D. M. Gibb, 2003    | Untreated HIV-1 infected children                                                                                                                                  | Administration of different combinations of antiretroviral drugs including ZDV, 3TC, ABC, and NFV. A minority of participants had documented exposure to antiretroviral | Comparison among different antiretroviral regimens                                                                                                     | Different regimens resistance prevalence                                                                                      |



|                      |                                                                                                                                                                                      |                                                                                                                                                                                                                                                                                                                                                          |                                                                                                                                          |                                                                                      |
|----------------------|--------------------------------------------------------------------------------------------------------------------------------------------------------------------------------------|----------------------------------------------------------------------------------------------------------------------------------------------------------------------------------------------------------------------------------------------------------------------------------------------------------------------------------------------------------|------------------------------------------------------------------------------------------------------------------------------------------|--------------------------------------------------------------------------------------|
|                      |                                                                                                                                                                                      | therapy before birth                                                                                                                                                                                                                                                                                                                                     |                                                                                                                                          |                                                                                      |
| J. A E. Nelson, 2015 | Neonates and infants up to 48 weeks of age living in Lilongwe, Malawi                                                                                                                | 7days PMTCT drugs: Infant: sdNVP at delivery, a week of AZT/3TC postpartum                                                                                                                                                                                                                                                                               | No additional intervention                                                                                                               | Overall HIV-1 pretreatment drug resistance, different regimens resistance prevalence |
| J. A E. Nelson, 2015 | Neonates and infants up to 48 weeks of age living in Lilongwe, Malawi                                                                                                                | Infant: sdNVP at delivery, a week of AZT/3TC postpartum;<br>Mother: sdNVP at delivery, a week of AZT/3TC postpartum; ART (AZT/3TC/NVP, AZT/3TC/nelfinavir, or AZT/3TC/ritonavir-boosted lopinavir) for 28 weeks                                                                                                                                          | No additional intervention                                                                                                               | Overall HIV-1 pretreatment drug resistance, different regimens resistance prevalence |
| J. A E. Nelson, 2015 | Neonates and infants up to 48 weeks of age living in Lilongwe, Malawi                                                                                                                | Infant: sdNVP at delivery, a week of AZT/3TC postpartum; daily NVP prophylaxis for 28 weeks                                                                                                                                                                                                                                                              | No additional intervention                                                                                                               | Overall HIV-1 pretreatment drug resistance, different regimens resistance prevalence |
| F. J. Louis, 2019    | Children <18 months old who acquired HIV infection through mother-to-child transmission in Haiti during the period of January 1, 2013 to December 31, 2014.                          | Genotyping of HIV-1 to detect drug resistance mutations in children exposed to ART                                                                                                                                                                                                                                                                       | Comparisons could be made to historical data or studies conducted in different settings.                                                 | specific mutation resistance prevalence                                              |
| R. S. Boerma, 2016   | Children aged 1 to 12 years from Lagos, Nigeria, who were untreated for HIV and had no prior exposure to PMTCT drugs, recruited between 2012 and 2013 for a 24-month follow-up study | Initiation of ART, typically an NNRTI (such as NVP) plus two NRTIs (such as AZT, and 3TC)                                                                                                                                                                                                                                                                | No specific control group, but compared treatment outcomes between children with and without pre-treatment HIV drug resistance (PDR).    | Overall HIV-1 pretreatment drug resistance prevalence                                |
| S. J. TOWNSEND, 2020 | HIV-1 infected mothers and their infants aged 0 to 15 months in Lusaka, Zambia, from 2015 to 2018                                                                                    | Prophylaxis:<br>NVP/Other/None/Missing                                                                                                                                                                                                                                                                                                                   | the study compared resistance profiles between mothers and infants who were on different ART regimens                                    | Overall HIV-1 pretreatment drug resistance prevalence                                |
| S. C. Inzaule, 2018  | HIV-infected infants aged up to 18 months from Nigeria, with samples collected between June 2014 and July 2015 across all six geopolitical regions.                                  | PMTCT drugs: Sd-NVP/<br>extended prophylaxis                                                                                                                                                                                                                                                                                                             | HIV-infected infants who were not exposed to PMTCT medication                                                                            | Overall HIV-1 pretreatment drug resistance prevalence                                |
| C. S. Crowell, 2017  | HIV-1 infected children less than 10 years of age initiating antiretroviral therapy (ART) in Mali.                                                                                   | HIV exposure                                                                                                                                                                                                                                                                                                                                             | Baseline NNRTI resistance among children receiving NNRTI-based ART versus those without baseline NNRTI resistance receiving PI-based ART | Overall HIV-1 pretreatment drug resistance prevalence                                |
| M. Salou, 2016       | Children diagnosed with HIV who are less than 18 months old in Togo                                                                                                                  | Different types of antiretroviral exposure<br>Infant: no ARV exposure/exposed to both neonatal prophylaxis and maternal ARV/neonatal prophylaxis. Neonatal exposure consisted of NVP, AZT or NVP+AZT.<br>Mother: short-time prophylaxis: AZT, NVP, AZT/3TC ( 3TC); AZT/NVP or AZT/efavirenz cART: AZT/3TC/NVP, AZT/3TC/EFV stavdine/3TC/NVP, TDF/3TC/EFV | No maternal ART and no neonatal prophylaxis                                                                                              | Different regimens resistance prevalence                                             |
| C. Kityo, 2016       | HIV-infected children less than 12 years old recruited at                                                                                                                            | PMTCT drugs:                                                                                                                                                                                                                                                                                                                                             | Children without prior ART exposure                                                                                                      | Overall HIV-1 pretreatment drug resistance,                                          |

|                       |                                                                                                                                                                                                                                                                                                |                                                                                                                                                                                           |                                                                                                                                                                                          |                                                                                                                               |
|-----------------------|------------------------------------------------------------------------------------------------------------------------------------------------------------------------------------------------------------------------------------------------------------------------------------------------|-------------------------------------------------------------------------------------------------------------------------------------------------------------------------------------------|------------------------------------------------------------------------------------------------------------------------------------------------------------------------------------------|-------------------------------------------------------------------------------------------------------------------------------|
|                       | three clinics in Uganda between January 2010 and August 2011.                                                                                                                                                                                                                                  | sdNVP, sdNVP+AZT                                                                                                                                                                          |                                                                                                                                                                                          | different regimens resistance prevalence, specific mutation resistance prevalence                                             |
| D. E. Dow, 2017       | HIV-exposed infants aged approximately 3 months in Northern Tanzania.                                                                                                                                                                                                                          | Maternal regimen: sdNVP Option A (daily zidovudine (AZT) as early as 14 weeks of gestation, sdNVP onset of labor, aAZT+3TC 7 days postpartum)<br>Infant regimen: NVP given /NVP not given | Infants not exposed to NVP or infants whose mothers did not receive any form of PMTCT intervention                                                                                       | Overall HIV-1 pretreatment drug resistance, different regimens resistance prevalence, specific mutation resistance prevalence |
| G. M. Hunt, 2011      | HIV-positive infants aged 2 years or younger who were born in South Africa and had been exposed to single-dose nevirapine (sdNVP) before initiating antiretroviral therapy (ART). Infants were categorized into different age groups: 0-6 months, 6-12 months, 12-18 months, and 18-24 months. | Mother and Infant: sdNVP                                                                                                                                                                  | The study did not include a formal control group. However, comparisons could be made indirectly between different age groups of infants to assess the impact of sdNVP exposure over time | Overall HIV-1 pretreatment drug resistance, specific mutation resistance prevalence                                           |
| C. Zeh, 2011          | Neonates to 6 months old in Kisumu, Kenya, whose HIV-infected mothers received triple antiretroviral prophylaxis from the 34th week of gestation through 6 months of breastfeeding.                                                                                                            | Mother: AZT/3TC/ NVP or NFV from 34 weeks gestation to 6 months postpartum<br>Infant: sdNVP at birth, breastfeeding 6 months                                                              | No direct control group, but a comparison between NVP-based and NFV-based regimens within the intervention group                                                                         | Overall HIV-1 pretreatment drug resistance, different regimens resistance prevalence, specific mutation resistance prevalence |
| N. I. Nii-Trebi, 2013 | 101 HIV-1 infected patients (adults $\geq$ 15 years old and children) in Koforidua, Eastern Region, Ghana, during February 2009 to January 2010                                                                                                                                                | Antiretroviral therapy (ART) with NRTIs (AZT, d4T, 3TC), NNRTIs (NVP, EFV), and PIs (NFV)                                                                                                 | ART-naive individuals (newly diagnosed cases without prior ART exposure)                                                                                                                 | Overall HIV-1 pretreatment drug resistance, different regimens resistance prevalence, specific mutation resistance prevalence |
| J. Neubert, 2016      | HIV-1-infected children treated at the University Hospital Düsseldorf, Germany, between January 2005 and December 2015                                                                                                                                                                         | Children who received or did not receive ART to prevent MTCT, and subsequently started on antiretroviral therapy including NRTIs, NNRTIs, and PIs                                         | Comparison with data from other countries, such as Spain and the United States, regarding HIV-1-infected children                                                                        | Overall HIV-1 pretreatment drug resistance, specific mutation resistance prevalence                                           |
| B. S. Taylor, 2011    | HIV-infected children less than two years old in South Africa who were exposed to NVP for PMTCT                                                                                                                                                                                                | Initiation of ART with RTV or LPV/r                                                                                                                                                       | Comparison of LPV/r treatment to RTV treatment                                                                                                                                           | Overall HIV-1 pretreatment drug resistance, different regimens resistance prevalence, specific mutation resistance prevalence |
| D. B. Fofana, 2023    | HIV-positive children (ages not specified but typically considered 0-18 years) in West Africa (Benin and Mali)                                                                                                                                                                                 | Integrase strand transfer inhibitors (INSTIs) including RAL, EVG, DTG, BIC, and CAB                                                                                                       | HIV-positive children who have not been treated with INSTIs (INSTI-naïve) or have received other types of antiretroviral therapy (ART).                                                  | Different regimens resistance prevalence, specific mutation resistance prevalence                                             |
| G. M. Hunt, 2019      | Neonates (4-8 weeks old) in South Africa, studied in 2010, 2011-2012, and 2012-2013                                                                                                                                                                                                            | Maternal ART plus infant NVP +/- AZT,<br>Infant NVP +/- AZT,<br>Any other ARV combination,<br>No/unknown exposure                                                                         | Infants with no or unknown PMTCT exposure compared to infants with known PMTCT exposure                                                                                                  | HIV-1 pretreatment drug resistance, different regimens resistance prevalence, specific mutation resistance prevalence         |
| M. M. Parker, 2003    | Neonates (infants younger than 60 days of age) born in New York State, USA, in 1998 and 1999                                                                                                                                                                                                   | Infants exposed to antiretroviral drugs prenatally (including AZT, 3TC, NVP, and PIs)                                                                                                     | Infants without documented prenatal antiretroviral exposure                                                                                                                              | Overall HIV-1 pretreatment drug resistance                                                                                    |
| M. M. Parker, 2003    | Neonates (infants younger than 60 days of age) born in New York State, USA, in 1998 and 1999                                                                                                                                                                                                   | PMTCT exposure                                                                                                                                                                            | Infants without documented prenatal antiretroviral exposure                                                                                                                              | Overall HIV-1 pretreatment drug resistance                                                                                    |

|                            |                                                                                                                                                                     |                                                                                                                                                                                                                                                                                                              |                                                                                                                                            |                                                                                                                                          |
|----------------------------|---------------------------------------------------------------------------------------------------------------------------------------------------------------------|--------------------------------------------------------------------------------------------------------------------------------------------------------------------------------------------------------------------------------------------------------------------------------------------------------------|--------------------------------------------------------------------------------------------------------------------------------------------|------------------------------------------------------------------------------------------------------------------------------------------|
| M. Karchava, 2006          | Infants born in New York State and diagnosed as HIV-positive within 24 weeks of age between 2001 and 2002                                                           | Infants exposed to antiretroviral drugs (ARVs), including prenatal, intrapartum, and neonatal (up to 6 weeks postnatal) ARV exposure                                                                                                                                                                         | Comparison with data from 1998-1999 to assess trends in drug resistance.                                                                   | Overall HIV-1 pretreatment drug resistance                                                                                               |
| P. Frange, 2018            | Children newly diagnosed with HIV-1 infection in France between 2006 and 2017                                                                                       | Previous exposure to in utero or postnatal antiretroviral prophylaxis, including only NRTI, including NRTI+PI, including NRTI+NNRTI, including NRTI+NNRTI+PI+NI                                                                                                                                              | No prior exposure to antiretroviral prophylaxis for PMTCT                                                                                  | Overall HIV-1 pretreatment drug resistance, different regimens resistance prevalence                                                     |
| N. Ngo-Giang-Huong, 2016   | HIV-infected children under 18 years old who initiated cART between 1998 and 2008 in international multi-center settings, primarily Europe and Africa               | Initial cART regimens including NNRTIs plus at least two NRTIs or unboosted PIs plus at least two NRTIs, with some children having pre-treatment drug resistance                                                                                                                                             | Children without PDR or with "PDR and fully active cART" as a control group                                                                | Different regimens resistance prevalence                                                                                                 |
| B. T. Tadesse, 2019        | Children aged 0 to 18 years diagnosed with HIV infection in Ethiopia during the period of 2017 to 2019                                                              | Children who have not previously received antiretroviral therapy (cART-naïve)                                                                                                                                                                                                                                | No direct comparator group is specified, but the results can be compared with other studies or data from different regions or time periods | Overall HIV-1 pretreatment drug resistance                                                                                               |
| M. R. Jordan, 2022         | Infants less than 18 months old, newly diagnosed with HIV and treatment-naïve in Namibia in 2016                                                                    | Some infants may have received prophylactic treatment with NVP+AZT for 6 weeks. Neonates (<1 month) were prescribed RAL+AZT+3TC; infants 4 weeks to 2 months of age were given zidovudine (AZT) + lamivudine (3TC) and ritonavir-boosted lopinavir; for infants 3 to 35 months old, ABC could substitute AZT | No direct control group, but comparison can be made with infants who have received ART or with data from other countries                   | Overall HIV-1 pretreatment drug resistance                                                                                               |
| S. S. Soeria-Atmadja, 2020 | ART-naïve children aged 3-12 years living in urban Uganda during the period 2015-2016, some of whom may have been exposed to antiretrovirals through PMTCT programs | Initiation of efavirenz-based ART consisting of two NRTIs and efavirenz                                                                                                                                                                                                                                      | Comparison of children with baseline PDR versus those without PDR                                                                          | Overall HIV-1 pretreatment drug resistance                                                                                               |
| P. C. Aulicino, 2019       | Newborns to 2.3-month-old infants born in Argentina between 2007 and 2014                                                                                           | Infant prophylaxis: short-course ZDV, ZDV+NVP (+3TC) at birth, zidovudine monotherapy<br>Maternal ART: NNRTI-based cART, PI-based cART 28, Breastfeeding                                                                                                                                                     | Infants who were not exposed to ARVs (ARV-unexposed group)                                                                                 | Overall HIV-1 pretreatment drug resistance, different regimens resistance prevalence                                                     |
| S. H. Abidi, 2021          | Children aged 0-15 years diagnosed with HIV-1 during the 2019 extensive pediatric HIV-1 outbreak in Larkana, Pakistan                                               | Antiretroviral therapy (ART) regimens containing NNRTIs (e.g., efavirenz) and NRTIs (e.g., zidovudine)                                                                                                                                                                                                       | ART-naïve individuals (children who have not yet started ART)                                                                              | Overall HIV-1 pretreatment drug resistance prevalence, specific mutation resistance prevalence                                           |
| A. Kovacs, 2005            | Infants aged ≤120 days                                                                                                                                              | Administration of didanosine (ddI) following at least 24 hours of zidovudine (ZDV) treatment                                                                                                                                                                                                                 | Comparison between infants receiving ddI + placebo and infants receiving ddI + ZDV                                                         | Overall HIV-1 pretreatment drug resistance prevalence, different regimens resistance prevalence, specific mutation resistance prevalence |

|                        |                                                                                                                                                                                                                               |                                                                                                                                                                   |                                                                                                                                                                            |                                                                                                                               |
|------------------------|-------------------------------------------------------------------------------------------------------------------------------------------------------------------------------------------------------------------------------|-------------------------------------------------------------------------------------------------------------------------------------------------------------------|----------------------------------------------------------------------------------------------------------------------------------------------------------------------------|-------------------------------------------------------------------------------------------------------------------------------|
| C. Delaugerre, 2009    | Neonates born in France between 1997 and 2004 whose mothers received antiretroviral prophylaxis during pregnancy                                                                                                              | Mother: AZT+3TC+DDI/NVP/LPV/IDV<br>Infant: AZT+3TC                                                                                                                | Comparison of the effects of different antiretroviral drug combinations, and potentially neonates who did not receive antiretroviral prophylaxis as an indirect comparison | Overall HIV-1 pretreatment drug resistance, different regimens resistance prevalence, specific mutation resistance prevalence |
| G. M. Ikomey, 2017     | Untreated, immunocompetent HIV-1 positive children aged 9 months to 6 years in Yaoundé, Cameroon, during 2015-2016                                                                                                            | Mother :<br>cART naïve,<br>cART exposed during pregnancy<br>Infant: unknown                                                                                       | No specific comparison group; baseline data for drug-naïve children                                                                                                        | Overall HIV-1 pretreatment drug resistance, specific mutation resistance prevalence                                           |
| S. D. d. Andrade, 2017 | Children aged neonates to adolescents (median age 3.7 years) diagnosed with HIV-1 between 2010 and 2015 in Manaus, Amazonas State, Brazil, who are antiretroviral-naïve (28.2% exposed to PMTCT)                              | Antiretrovirals received during pregnancy, Intra-partum prophylaxis with ZDV, Postnatal infant prophylaxis with ZDV                                               | Comparison between children exposed to PMTCT and those not exposed                                                                                                         | Overall HIV-1 pretreatment drug resistance, different regimens resistance prevalence, specific mutation resistance prevalence |
| L. Kuhn, 2015          | Newly diagnosed HIV-infected children under 2 years old, recruited in Johannesburg, South Africa                                                                                                                              | Maternal antiretroviral regimen: cART, Zidovudine/ nevirapine, Zidovudine alone, Nevirapine alone<br>Infant prophylaxis: Nevirapine alone, Zidovudine/ nevirapine | Without documented antiretroviral exposure                                                                                                                                 | Overall HIV-1 pretreatment drug resistance, different regimens resistance prevalence, specific mutation resistance prevalence |
| L. Kuhn, 2015          | Newly diagnosed HIV-infected children under 2 years old, recruited in Johannesburg, South Africa                                                                                                                              | Maternal antiretroviral regimen:<br>Infant prophylaxis                                                                                                            | With documented antiretroviral exposure                                                                                                                                    | Overall HIV-1 pretreatment drug resistance, different regimens resistance prevalence, specific mutation resistance prevalence |
| J. Fokam, 2011         | This study involved 92 HIV-1-infected children aged between 3 months and 12 years in Yaoundé, Cameroon (from June 2009 to February 2011), including 41 drug-naïve and 51 first-line antiretroviral treatment-failing children | The interventions included standard first-line ART regimens such as AZT/3TC/NVP and a fixed-dose combination of d4T/3TC/NVP                                       | The study compared drug-naïve children with those experiencing first-line ART failure                                                                                      | Overall HIV-1 pretreatment drug resistance, specific mutation resistance prevalence                                           |
| J. Han, 2009           | HIV-1-infected pregnant women in China who are ART-naïve                                                                                                                                                                      | sdNVP<br>ZDV-sdNVP                                                                                                                                                | Comparison between sdNVP and ZDV-sdNVP regimens                                                                                                                            | Overall HIV-1 pretreatment drug resistance, different regimens resistance prevalence                                          |
| S. H. Eshleman, 2001   | HIV-1-positive pregnant women and their infants in Uganda                                                                                                                                                                     | Single-dose nevirapine (NVP) to prevent HIV-1 vertical transmission                                                                                               | Self-comparison within the same intervention group (women and infants receiving NVP)                                                                                       | Overall HIV-1 pretreatment drug resistance, specific mutation resistance prevalence                                           |
| N. A. Martinson, 2007  | HIV-1 infected infants aged neonates to 12 weeks old in South Africa (Soweto and Durban) before 2007                                                                                                                          | Single-dose nevirapine (sd-NVP) administered to mothers at the onset of labor and to newborns                                                                     | Potentially infants not exposed to sd-NVP or infants without detectable resistance                                                                                         | Overall HIV-1 pretreatment drug resistance, specific mutation resistance prevalence                                           |
| P. Vaz, 2012           | HIV-infected children aged 0-15 years initiating ART at the main pediatric ART referral center in Maputo, Mozambique between 2007 and 2008                                                                                    | Standard first-line ART regimens including ZDV+ 3TC+NVP, d4T+3TC+NVP, and d4T+3TC+LPV/r                                                                           | Baseline characteristics and ART outcomes compared to outcomes at 12 months post-initiation                                                                                | Overall HIV-1 pretreatment drug resistance, specific mutation resistance prevalence                                           |
| F. I. Olusola, 2021    | ART-naïve HIV-infected children less than 15 years old residing in Ibadan, Nigeria, around the year 2021                                                                                                                      | Sequencing of the HIV-1 pol gene to identify mutations conferring resistance to NNRTIs and NRTIs in ART-naïve                                                     | The prevalence of PDR in ART-naïve children compared to historical data or                                                                                                 | Overall HIV-1 pretreatment drug resistance, specific mutation resistance prevalence                                           |

|                             |                                                                                                                                                                                                   | children                                                                                                                                                                                                                                  | other populations                                                                                                                                           |                                                                                                                               |
|-----------------------------|---------------------------------------------------------------------------------------------------------------------------------------------------------------------------------------------------|-------------------------------------------------------------------------------------------------------------------------------------------------------------------------------------------------------------------------------------------|-------------------------------------------------------------------------------------------------------------------------------------------------------------|-------------------------------------------------------------------------------------------------------------------------------|
| P. M. de S. Guimaraes, 2015 | Adults and children recently diagnosed with HIV in São Paulo, Brazil, between 2012 and 2014                                                                                                       | Evaluation of transmitted drug resistance (TDR) among antiretroviral therapy-naïve individuals                                                                                                                                            | No specific comparison group mentioned, but the study compared TDR prevalence against historical data and other studies                                     | Overall HIV-1 pretreatment drug resistance, specific mutation resistance prevalence                                           |
| B. Masquelier, 2001         | HIV-1 infected neonates born in France                                                                                                                                                            | Mothers who received zidovudine as part of their antiretroviral therapy regimen during pregnancy                                                                                                                                          | For comparison purposes, neonates born to mothers who did not receive zidovudine or those who received alternative antiretroviral regimens during pregnancy | Overall HIV-1 pretreatment drug resistance, different regimens resistance prevalence, specific mutation resistance prevalence |
| M. R. Jordan, 2017          | Children under 18 months old in Sub-Saharan African countries (Mozambique, Swaziland, South Africa, Uganda, and Zimbabwe) diagnosed with HIV through early infant diagnosis between 2011 and 2014 | Maternal and neonatal ARV drug exposure as part of PMTCT programs. Non-nucleoside reverse transcriptase inhibitors (NNRTIs): NVP, EFV, ETR, RPV<br>Nucleoside/nucleotide reverse transcriptase inhibitors (NRTIs/TIs): AZT, d4T, FTC, TDF | Children without documented maternal or neonatal ARV exposure and those with unknown exposure histories                                                     | Overall HIV-1 pretreatment drug resistance, different regimens resistance prevalence, specific mutation resistance prevalence |
| M. R. Jordan, 2017          | Children under 18 months old in Mozambique diagnosed with HIV through early infant diagnosis between 2011 and 2014                                                                                | Maternal and neonatal ARV drug exposure as part of PMTCT programs. Non-nucleoside reverse transcriptase inhibitors (NNRTIs): NVP, EFV, ETR, RPV<br>Nucleoside/nucleotide reverse transcriptase inhibitors (NRTIs/TIs): AZT, d4T, FTC, TDF | Children without documented maternal or neonatal ARV exposure and those with unknown exposure histories                                                     | Overall HIV-1 pretreatment drug resistance, different regimens resistance prevalence, specific mutation resistance prevalence |
| M. R. Jordan, 2017          | Children under 18 months old in Sub-Saharan African countries Swaziland diagnosed with HIV through early infant diagnosis between 2011 and 2014                                                   | Maternal and neonatal ARV drug exposure as part of PMTCT programs. Non-nucleoside reverse transcriptase inhibitors (NNRTIs): NVP, EFV, ETR, RPV<br>Nucleoside/nucleotide reverse transcriptase inhibitors (NRTIs/TIs): AZT, d4T, FTC, TDF | Children without documented maternal or neonatal ARV exposure and those with unknown exposure histories                                                     | Overall HIV-1 pretreatment drug resistance, different regimens resistance prevalence, specific mutation resistance prevalence |
| M. R. Jordan, 2017          | Children under 18 months old in Sub-Saharan African countries Uganda diagnosed with HIV through early infant diagnosis between 2011 and 2014                                                      | Maternal and neonatal ARV drug exposure as part of PMTCT programs. Non-nucleoside reverse transcriptase inhibitors (NNRTIs): NVP, EFV, ETR, RPV<br>Nucleoside/nucleotide reverse transcriptase inhibitors (NRTIs/TIs): AZT, d4T, FTC, TDF | Children without documented maternal or neonatal ARV exposure and those with unknown exposure histories                                                     | Overall HIV-1 pretreatment drug resistance, different regimens resistance prevalence, specific mutation resistance prevalence |
| M. R. Jordan, 2017          | Children under 18 months old in Sub-Saharan African countries Zimbabwe diagnosed with HIV through early infant diagnosis between 2011 and 2014                                                    | Maternal and neonatal ARV drug exposure as part of PMTCT programs. Non-nucleoside reverse transcriptase inhibitors (NNRTIs): NVP, EFV, ETR, RPV<br>Nucleoside/nucleotide reverse transcriptase inhibitors (NRTIs/TIs): AZT, d4T, FTC, TDF | Children without documented maternal or neonatal ARV exposure and those with unknown exposure histories                                                     | Overall HIV-1 pretreatment drug resistance, different regimens resistance prevalence, specific mutation resistance prevalence |
| N. Yeganeh, 2018            | Pregnant women and their newborns in South Africa, Brazil, and Argentina between April 2004 and January 2011                                                                                      | group A: AZT 6 weeks<br>group B: AZT 6 weeks + NVP 1 week<br>group C: AZT 6 weeks+NVP+3TC 6 weeks                                                                                                                                         | Untreated mother-infant pairs and those treated with different ART regimens                                                                                 | Overall HIV-1 pretreatment drug resistance, different regimens resistance prevalence, specific mutation resistance prevalence |

|                                 |                                                                                                                                                                                   |                                                                                                                                                                                                  |                                                                                                                                                      |                                                                                                                               |
|---------------------------------|-----------------------------------------------------------------------------------------------------------------------------------------------------------------------------------|--------------------------------------------------------------------------------------------------------------------------------------------------------------------------------------------------|------------------------------------------------------------------------------------------------------------------------------------------------------|-------------------------------------------------------------------------------------------------------------------------------|
|                                 |                                                                                                                                                                                   | Infant prophylaxis medications:<br>ZDV, ZDV+NVP, ZDV+NFV+3TC                                                                                                                                     |                                                                                                                                                      |                                                                                                                               |
| U. Neogi, 2012                  | Children and adolescents aged 2 to 16 years old, perinatally infected with HIV-1 subtype C, and antiretroviral therapy-naïve, from Bangalore, India, between 2007 and 2011        | Participants were antiretroviral therapy-naïve, with some potentially exposed to nevirapine as part of PMTCT strategies                                                                          | There was no specific control group in this study                                                                                                    | Overall HIV-1 pretreatment drug resistance, specific mutation resistance prevalence                                           |
| S. S. D. d. Azevedo, 2022       | Treatment-naïve children and adolescents (neonates to 19 years old) infected with HIV-1 through vertical transmission in the Rio de Janeiro State, Brazil, between 2001 and 2007. | Maternal antiretroviral therapy for PMTCT, starting with zidovudine monotherapy and later transitioning to combination ART including NRTIs and NNRTIs                                            | Comparative analysis of TDRM prevalence between the time periods 2008 and 2012                                                                       | Overall HIV-1 pretreatment drug resistance, different regimens resistance prevalence, specific mutation resistance prevalence |
| S. S. D. d. Azevedo, 2022       | Treatment-naïve children and adolescents (neonates to 19 years old) infected with HIV-1 through vertical transmission in the Rio de Janeiro State, Brazil, between 2008 and 2012. | Maternal antiretroviral therapy for PMTCT, starting with zidovudine monotherapy and later transitioning to combination ART including NRTIs and NNRTIs                                            | Comparative analysis of TDRM prevalence between the time periods 2001 and 2007                                                                       | Overall HIV-1 pretreatment drug resistance, different regimens resistance prevalence, specific mutation resistance prevalence |
| T. Rogo, 2015                   | HIV-infected children attending the only pediatric HIV clinic in Rhode Island between 1991 and 2012, ranging in age from neonates to adolescents                                  | Antiretroviral therapy (ART), including NNRTIs, NRTIs, and PIs                                                                                                                                   | ART-naïve children serving as a comparison group to ART-experienced children                                                                         | Overall HIV-1 pretreatment drug resistance, specific mutation resistance prevalence                                           |
| A. Chalermchokcharoen kit, 2009 | HIV-positive pregnant women and their infants in Thailand                                                                                                                         | Mother: AZT+NVP<br>Infant: sdNVP at birth                                                                                                                                                        | No specific control group mentioned, but the study likely compares the outcomes to historical data or theoretical scenarios without the intervention | Overall HIV-1 pretreatment drug resistance, different regimens resistance prevalence, specific mutation resistance prevalence |
| T. T. B. Phung, 2015            | HIV-1 infected children aged 1 month to 12 years (mean age of 50 months) from 21 provinces in Northern Vietnam, recruited between December 2009 and December 2011                 | Genotyping of antiretroviral-naïve children to detect drug resistance mutations without specifying any intervention or drug regimen                                                              | Historical data on drug resistance rates in other populations in Vietnam                                                                             | Overall HIV-1 pretreatment drug resistance, specific mutation resistance prevalence                                           |
| F. Antunes, 2015                | 6 to 48-week-old children in Maputo, Mozambique, enrolled between July 2011 and March 2012                                                                                        | Infant:<br>ARV prophylaxis: AZT, sd-NVP + daily NVP<br>Mothers: antepartum daily AZT as early as 14 weeks of gestation, sd-NVP at onset of labor and twice daily AZT + 3TC for 7 days postpartum | The study did not include an explicit control group but analyzed various factors related to the development of NVP resistance                        | Overall HIV-1 pretreatment drug resistance, specific mutation resistance prevalence                                           |
| F. J. Almeida, 2009             | HIV-1-infected children in São Paulo, Brazil, who were born to mothers who were not treated with antiretroviral therapy during pregnancy                                          | Children receiving or not receiving HAART                                                                                                                                                        | Comparison: ARV-naïve children versus children failing HAART.<br>Control Group: ARV-naïve children (without prior antiretroviral exposure)           | Overall HIV-1 pretreatment drug resistance, different regimens resistance prevalence, specific mutation resistance prevalence |

|                    |                                                                                                                                                                                |                                                                                                                                                                                                            |                                                                                                                                                                         |                                                                                                                               |
|--------------------|--------------------------------------------------------------------------------------------------------------------------------------------------------------------------------|------------------------------------------------------------------------------------------------------------------------------------------------------------------------------------------------------------|-------------------------------------------------------------------------------------------------------------------------------------------------------------------------|-------------------------------------------------------------------------------------------------------------------------------|
| J. M. Fogel, 2013  | Infants aged 0 to 6 months from South Africa, Tanzania, Uganda, and Zimbabwe who were enrolled in the study between 2010 and 2013.                                             | Mothers received sdNVP and infants received sdNVP+ZDV/3TC for PMTCT<br>Infants received extended nevirapine prophylaxis (daily NVP until 6 weeks of age) followed by NVP or placebo until 6 months of age. | Infants received no additional extended NVP prophylaxis                                                                                                                 | Overall HIV-1 pretreatment drug resistance, different regimens resistance prevalence                                          |
| M. Chaix, 2007     | Pregnant women aged 15-49 years old, residing in Abidjan, Côte d'Ivoire, who are HIV positive and participated in the ANRS 1201/1202 Ditrane Plus study between 2006 and 2007. | mother: AZT+NVP at $\geq 36$ weeks<br>infant: AZT+sdNVP 7days                                                                                                                                              | Comparison between women who received sdNVP alone and those who received sdNVP + ZDV, as well as infants who received sdNVP alone versus those who received sdNVP + ZDV | Overall HIV-1 pretreatment drug resistance, specific mutation resistance prevalence                                           |
| M. Jarchi, 2019    | Children under 12 years old in Iran, diagnosed between June 2014 and January 2019.                                                                                             | Genotypic testing for transmitted drug resistance (TDR) mutations in the pol gene of HIV-1 in treatment-naïve children                                                                                     | Not applicable, as there is no direct comparison group                                                                                                                  | Overall HIV-1 pretreatment drug resistance, specific mutation resistance prevalence                                           |
| H. H. K. Thu, 2024 | HIV-1 infected children under 18 months old from the Central Highlands and Southern regions of Vietnam during the period 2017–2021                                             | mother: two nucleoside reverse transcriptase inhibitors (NRTIs) plus one non-nucleoside reverse transcriptase<br>infant: sdNVP                                                                             | Infants born to mothers who did not receive any PMTCT intervention or different ART Regimen                                                                             | Specific mutation resistance prevalence                                                                                       |
| D. A. Lehman, 2012 | Infants exposed to sdNVP                                                                                                                                                       | Infants subsequently treated with NVP-HAART                                                                                                                                                                | Infants without detectable nevirapine resistance mutations serve as the reference group                                                                                 | Overall HIV-1 pretreatment drug resistance, specific mutation resistance prevalence                                           |
| R. G. FISHER, 2015 | Infants less than 3 years old in South Africa                                                                                                                                  | Dual AZT and NVP prophylaxis regimen for prevention of HIV mother-to-child transmission (PMTCT)                                                                                                            | Conventional bulk sequencing versus next-generation sequencing (NGS) using Ion PGM and MiSeq platforms                                                                  | different regimens resistance prevalence, specific mutation resistance prevalence                                             |
| K. Ronen, 2017     | Neonates to 6-week-old infants in Ethiopia who participated in the study aimed at preventing mother-to-child transmission of HIV between February 2001 and March 2007          | Infants received nevirapine prophylaxis (either sdNVP or ED-NVP) starting from Day 8 of life for up to 6 weeks                                                                                             | Infants receiving single-dose nevirapine (SD-NVP) served as the comparator group                                                                                        | Overall HIV-1 pretreatment drug resistance, different regimens resistance prevalence, specific mutation resistance prevalence |
| J. Fokam, 2018     | Eighteen HIV-1 vertically infected children, seven of whom were born to mothers who received PMTCT interventions, and eleven born to mothers without PMTCT exposure            | Next-generation sequencing (NGS) for determining HIV-1 drug resistance and viral tropism, AZT+3TC+NVP were used in PMTCT-exposed infants                                                                   | Comparative analysis of drug resistance mutations and viral tropism between Sanger sequencing and NGS                                                                   | Overall HIV-1 pretreatment drug resistance, different regimens resistance prevalence, specific mutation resistance prevalence |

Abbreviations, DRMs = drug resistance mutations; ART antiretroviral therapy; cART = combination antiretroviral therapy; NRTIs = nucleoside reverse transcriptase inhibitors; NNRTIs = non-nucleoside reverse transcriptase inhibitors; NVP = nevirapine; PI = protease inhibitor; LPV/r = lopinavir/ritonavir; INSTIs = integrase strand transfer inhibitors; d4T = stavudine; 3TC = lamivudine ; DBS = dried blood spots; VF = virological failure; PDR = pretreatment HIV drug resistance; VL = viral load; PMTCT = mother-to-child transmission; RAMs = resistance-associated mutations; ZDV = Zidovudine; NFV = nelfinavir; RTIs = reverse transcriptase inhibitors; TAMs = thymidine analogue mutations; HAART = Highly Active Antiretroviral Therapy.

**Table S3B: PICO Summary of included studies for treatment-experienced children prevalence analysis**

| Study                   | Patient/Population                                                                                                                                                                                                                                                                                       | Intervention                                                                                                                                                                                                                                                                                                             | Comparison                                                                                                                                                                            | Outcome                                                                                                                                                                            |
|-------------------------|----------------------------------------------------------------------------------------------------------------------------------------------------------------------------------------------------------------------------------------------------------------------------------------------------------|--------------------------------------------------------------------------------------------------------------------------------------------------------------------------------------------------------------------------------------------------------------------------------------------------------------------------|---------------------------------------------------------------------------------------------------------------------------------------------------------------------------------------|------------------------------------------------------------------------------------------------------------------------------------------------------------------------------------|
| Hannah Green, 2006      | HIV-1-infected children aged 3 months to 18 years from six countries (Italy, Brazil, UK, Spain, Germany, Portugal) enrolled between June 2000 and July 2003. The majority (97%) acquired HIV through PMTCT. All children had VF with HIV-1 RNA >2,000 copies/ml.                                         | Children were randomized to receive genotypic resistance testing at the time of switching ART due to VF. Resistance testing was performed using the Virtual Phenotype TM, and results were used to guide subsequent ART regimens.<br>NRTIs:15(17%); NRTIs+NNRTIs:10(11%);<br>NRTIs+Pis:17(20%); NRTIs+NNRTIs+Pis:17(20%) | The control group did not receive resistance testing. Instead, their ART regimens were switched based on clinical judgment without the guidance of genotypic resistance testing.      | Primary outcomes included the change in HIV-1 RNA viral load at 48 and 96 weeks, the proportion of patients with undetectable viral loads, and changes in CD4+ T-cell percentages. |
| T. Sonia Boender, 2016  | HIV-1-positive adults and children in Uganda who were on NNRTI-based first-line ART and experienced virological failure between 2010 and 2011.                                                                                                                                                           | Continuation of first-line NNRTI-based ART with the following regimens: Nevirapine-based ART: d4T + 3TC + NVP or AZT + 3TC + NVP; Efavirenz-based ART: AZT + 3TC + EFV or TDF + FTC + EFV<br>Participants with VL ≥1000 copies/mL underwent genotypic resistance testing to monitor the accumulation of DRMs.            | Comparison of DRM accumulation rates and predicted drug susceptibility between adults and children, as well as between those on nevirapine-based versus efavirenz-based ART regimens. | Rate of DRM accumulation per year and the decline in susceptibility to NNRTIs and NRTIs following continued virological failure.                                                   |
| W. I. Towler, 2010      | HIV-1-infected children in Uganda who received ART as part of a prospective observational study between 2004 and 2006. The study included children with and without prior single-dose nevirapine exposure.                                                                                               | The children received a cART regimen consisting of d4T, 3TC, and NVP. Children weighing <9 kg received syrup formulations, while those >9 kg received a fixed-dose combination tablet (Triomune).                                                                                                                        | Comparison between children with prior sdNVP exposure and those without it in terms of the presence and development of DRMs before and after ART initiation.                          | DRM accumulation, virological suppression, NRTI/NNRTI resistance emergence                                                                                                         |
| Doreen Kamori, 2023     | HIV-1-positive children (≤15 years old) and adults in Tanzania, who were not part of PMTCT programs and were enrolled after confirmed virological failure in 2020.                                                                                                                                       | Participants were on ART regimens, including:<br>- Dolutegravir-based regimen: TDF + 3TC + DTG<br>- PI-based regimen: Various combinations including LPV/r, ATV/r with NRTIs like TDF and 3TC.                                                                                                                           | Comparison of DRM accumulation and resistance profiles between participants on dolutegravir-based regimens and those on PI-based regimens.                                            | Prevalence of HIV DRMs and the patterns of resistance among participants, including the emergence of resistance to dolutegravir and PIs.                                           |
| Mia Coetzer, 2013       | HIV-infected Cambodian children under 15 years of age who have been on first-line ART for at least 6 months, monitored at the Angkor Hospital for Children in 2011.                                                                                                                                      | Continuation of first-line ART, primarily consisting of stavudine, lamivudine, and nevirapine, with routine monitoring of viral load and CD4 counts. DRMs were determined using the IAS-USA 2011 list.                                                                                                                   | Children with extensive drug resistance mutations (≥ 4 mutations) versus those with fewer mutations.                                                                                  | Prevalence and patterns of DRMs, resistance levels, number of mutations, and predicted susceptibility to second-line ART                                                           |
| Theresa M Rossouw, 2015 | HIV-1 infected children in South Africa, primarily under 3 years of age, who initiated PI-based ART and subsequently experienced virological failure between 2008 and 2012. The cohort included children with advanced clinical disease, severe malnutrition, and a high tuberculosis co-infection rate. | PI-based ART, primarily using regimens including LPV/r, with a focus on children who received ritonavir as a single protease inhibitor (RTV-sPI) during co-treatment for TB. Genotypic drug resistance testing was performed after virological failure.                                                                  | Children with major PI mutations versus those without, and comparisons of different ART dosing strategies (RTV-sPI, double-dose LPV/r, super-boosted LPV/r).                          | Prevalence of major PI mutations, associated factors such as duration of ART and TB co-treatment, and the projected susceptibility of the virus to various ART drugs.              |



|                                        |                                                                                                                                                                                                                                                     |                                                                                                                                                                                                                                                                                                                              |                                                                                                                                                                                                      |                                                                                                                                                                                                        |
|----------------------------------------|-----------------------------------------------------------------------------------------------------------------------------------------------------------------------------------------------------------------------------------------------------|------------------------------------------------------------------------------------------------------------------------------------------------------------------------------------------------------------------------------------------------------------------------------------------------------------------------------|------------------------------------------------------------------------------------------------------------------------------------------------------------------------------------------------------|--------------------------------------------------------------------------------------------------------------------------------------------------------------------------------------------------------|
| Marie-Laure Chaix, 2005                | HIV-1-infected children in Côte d'Ivoire, enrolled in the ANRS 1278 cohort between October 2000 and September 2003. The study involved 115 children with a median age of 6.35 years (range: 1.2–15 years) who received HAART for at least 6 months. | Administration of HAART, consisting of 2 NRTIs combined with either nelfinavir (70.5%) or efavirenz (29.5%). NRTIs used included ZDV, 3TC, d4T, and ddI. Genotypic resistance tests were performed in cases of virologic failure (defined as viral load $\geq 3 \log_{10}$ copies/mL) after at least 6 months of HAART.      | Nelfinavir-based versus efavirenz-based regimens, and virologic success versus failure.                                                                                                              | Frequency of DRMs, resistance to 3TC, NNRTIs, PIs, and overall prevalence of drug-resistant viruses.                                                                                                   |
| Elizabeth S Machado, 2004              | HIV-1-infected children in Brazil, receiving antiretroviral therapy according to Brazilian Ministry of Health guidelines between November 1999 and January 2002. The study included 75 children up to 14 years of age.                              | Two groups based on treatment history: 1) Dual therapy group, receiving two NRTIs; 2) Triple therapy group, receiving two NRTIs combined with a PI or a NNRTI. Genotypic resistance tests were performed on plasma samples, targeting reverse transcriptase and protease genes.                                              | Dual therapy versus triple therapy, with further subdivision by prior ARV exposure, and B versus non-B subtypes in terms of DRMs and treatment response.                                             | Frequency of DRMs, impact on virologic/immunologic responses, cross-resistance, subtype influence on CD4+ recovery, and prior NRTI exposure effects.                                                   |
| Ana Rodríguez-Galet, 2023              | HIV-infected children ( $\leq 12$ years old) and adults in Equatorial Guinea, including 57 children/adolescents and 187 adults in 2019-2020.                                                                                                        | ART regimens used in the study population, primarily focusing on NRTIs (AZT, 3TC, TDF, FTC, D4T, ABC), NNRTIs (EFV, NVP), PIs (LPV/r), and INSTIs (DTG). Monitoring included DRMs and virological failure.                                                                                                                   | ART-naïve versus ART-treated children, and effectiveness of different ART regimens, including resistance to various drug classes.                                                                    | Prevalence of DRMs in both ART-naïve and ART-treated populations, virological failure rates (defined as viral load $>1000$ copies/mL), and the impact on predicted antiretroviral drug susceptibility. |
| M. Rubio-Garrido, 2021                 | HIV-infected children and adolescents in Democratic Republic of Congo, who were receiving ART in 2016. The study included 71 participants with a median age of 14 years.                                                                            | Continuation of ART with the following regimens:<br>NRTI-based ART: AZT + 3TC + NVP or TDF + FTC + EFV<br>NNRTI-based ART: EFV + 3TC + AZT or ABC + 3TC + LPV/r<br>Participants with viral load (VL) $\geq 1000$ copies/mL underwent genotypic resistance testing to monitor the accumulation of DRMs.                       | Comparison of DRMs between different drug classes and across different ART regimens. The study also examined the impact of ART exposure time on the development of DRMs.                             | Prevalence of major DRMs to NRTIs, NNRTIs, PIs, and INSTIs. The study found high levels of resistance, particularly to NNRTIs and NRTIs.                                                               |
| Birkneh Tilahun Tadesse, 2018          | HIV-infected children under 18 years of age in Southern Ethiopia, enrolled in the Ethiopia Pediatric HIV Cohort (EPHC) between 2015 and 2017, who were experiencing virologic treatment failure after being on cART for more than 5 months.         | Continuation of first-line NNRTI-based ART with the following regimens:<br>- Nevirapine-based ART: d4T + 3TC + NVP or AZT + 3TC + NVP<br>- Efavirenz-based ART: AZT + 3TC + EFV or TDF + FTC + EFV<br>Participants with VL $\geq 1000$ copies/mL underwent genotypic resistance testing to monitor the accumulation of DRMs. | Comparison of DRMs between different drug classes (NRTIs, NNRTIs) among children failing first-line ART. The study also compared the prevalence and impact of DRMs on second-line treatment options. | Prevalence of DRMs, particularly dual-class resistance (NRTIs and NNRTIs), and the impact on the effectiveness of recommended second-line ART regimens.                                                |
| Christian Diamant Mossoro-Kpinde, 2017 | HIV-1-infected children in the Central African Republic, aged 4–17 years, who had been on ART for at least 6 months in 2013. The study included 220 children, with a median age of 12 years.                                                        | Continuation of WHO-recommended first-line and second-line ART regimens:<br>- First-line ART: AZT + 3TC + NVP, AZT + 3TC + EFV, d4T + 3TC + EFV, d4T + 3TC + LPV/r                                                                                                                                                           | Comparison of DRMs between children on first-line ART versus second-line ART. The study also compared the resistance profiles of viruses to NRTIs, NNRTIs, and                                       | Prevalence of DRMs, particularly resistance to NRTIs, NNRTIs, and PIs. The study observed high levels of virological failure and drug resistance among the children, leading to the                    |

|                          |                                                                                                                                                                                                                                                                                                            |                                                                                                                                                                                                                                                                                                                                                                                                                            |                                                                                                                                                                                                      |                                                                                                                                                         |
|--------------------------|------------------------------------------------------------------------------------------------------------------------------------------------------------------------------------------------------------------------------------------------------------------------------------------------------------|----------------------------------------------------------------------------------------------------------------------------------------------------------------------------------------------------------------------------------------------------------------------------------------------------------------------------------------------------------------------------------------------------------------------------|------------------------------------------------------------------------------------------------------------------------------------------------------------------------------------------------------|---------------------------------------------------------------------------------------------------------------------------------------------------------|
|                          |                                                                                                                                                                                                                                                                                                            | <p>- Second-line ART: AZT + 3TC + LPV/r, d4T + 3TC + LPV/r</p> <p>Participants with VL <math>\geq</math>1000 copies/mL underwent genotypic resistance testing to monitor DRMs.</p>                                                                                                                                                                                                                                         | PIs among the children.                                                                                                                                                                              | need for potential third-line regimens.                                                                                                                 |
| Khady Kebe, 2013         | HIV-1-infected children in Senegalese, aged less than 15 years, treated with NRTI and NNRTI based first-line ART for at least 6 months according to WHO recommendations. 125 children were included, with a median age of 7 years.                                                                         | <p>Continuation of WHO-recommended first-line ART regimens, including:</p> <ul style="list-style-type: none"> <li>- AZT + 3TC + NVP</li> <li>- AZT + 3TC + EFV</li> <li>- d4T + 3TC + NVP</li> <li>- d4T + 3TC + EFV</li> </ul> <p>Participants with a viral load <math>\geq</math>3.0 log<sub>10</sub> copies/mL underwent genotypic resistance testing to monitor DRMs.</p>                                              | No direct comparison group mentioned in the provided text, but the study evaluates VF based on the 2010 revised WHO criteria (HIV-1 RNA $\geq$ 3.7 log <sub>10</sub> copies/ml).                     | Virological failure rates, prevalence of drug-resistant mutations, resistance patterns to NRTIs, NNRTIs, and PIs, multi-class resistance occurrences    |
| Claudia S. Crowell, 2017 | HIV-infected children under 10 years of age in Mali in 2010. The study included 120 children, with a median age of 2.6 years.                                                                                                                                                                              | <p>Initiation of ART, with regimens including:</p> <ul style="list-style-type: none"> <li>- NNRTI-based ART: Mainly EFV or NVP combined with NRTIs such as AZT, 3TC, and ABC.</li> <li>- PI-based ART: Mainly LPV/r combined with NRTIs.</li> </ul> <p>Baseline resistance testing was performed, and participants with VL <math>\geq</math>1000 copies/mL at 6 months underwent further genotypic resistance testing.</p> | Comparison of virological failure rates and DRMs among children initiated on NNRTI-based versus PI-based ART. The study also analyzed the impact of baseline NNRTI resistance on treatment outcomes. | Prevalence of baseline NNRTI resistance, virological failure rates at 6 months, and the association between baseline resistance and treatment outcomes. |
| Cheryl A. Stoddart, 2014 | South African children < 15 years old with known treatment history, who were exposed to a d4T+3TC (n = 279) or a ABC+3TC-based regimen (n = 91) in 2012                                                                                                                                                    | <p>Continuation of first-line ART regimens:</p> <ul style="list-style-type: none"> <li>- ABC + 3TC + EFV/NVP/LPV/r</li> <li>- d4T + 3TC + EFV/NVP/LPV/r</li> </ul> <p>Second-line ART: Didanosine-based regimen upon virological failure.</p>                                                                                                                                                                              | Comparison between children failing ABC-based regimens and those failing d4T-based regimens.                                                                                                         | Cross-resistance to didanosine, effectiveness of didanosine in second-line regimens, recommendation for zidovudine-based second-line regimens           |
| J-P Aboulker, 2004       | HIV-1-positive children under 12 weeks were eligible if they had evidence of definitive HIV-1 infection, they were a part of PMTCT programs and initiated HAART (stavudine, didanosine, nelfinavir) at a median age of 2.5 months in a multicenter study across France, Spain, Germany, Italy, UK in 1999. | Continuation of HAART with stavudine (d4T) + didanosine (ddl) + nelfinavir (NFV). Participants were followed up for 72 weeks with monitoring for CD4 counts, viral load, and emergence of drug resistance mutations.                                                                                                                                                                                                       | Not applicable (non-randomized, open-label study).                                                                                                                                                   | Safety, efficacy (CD4 count, viral load), drug resistance, virological failure, acquisition of resistance mutations, regimen tolerability.              |
| T Puthanakit, 2010       | HIV-infected children in Thailand, enrolled in 2002, under 18 years old, who failed first-line NNRTI-based ART (nevirapine or efavirenz) and underwent genotypic resistance testing within 12 months before switching to second-line therapy.                                                              | <p>Continuation of NNRTI-based ART with the following regimens:</p> <ul style="list-style-type: none"> <li>- Nevirapine-based ART: d4T + 3TC + NVP or AZT + 3TC + NVP</li> <li>- Efavirenz-based ART: AZT + 3TC + EFV</li> </ul> <p>Participants with VL <math>\geq</math>1000 copies/mL underwent genotypic resistance testing to monitor DRMs.</p>                                                                       | Different NNRTI-based regimens (NVP vs. EFV), and their association with virological failure.                                                                                                        | Prevalence of DRMs, resistance to NRTIs, resistance to NNRTIs, effectiveness of second-line regimens                                                    |

|                           |                                                                                                                                                                                                                                                                                       |                                                                                                                                                                                                                                                                                                                                                                                                                                                                                                                             |                                                                                                                                                                  |                                                                                                              |
|---------------------------|---------------------------------------------------------------------------------------------------------------------------------------------------------------------------------------------------------------------------------------------------------------------------------------|-----------------------------------------------------------------------------------------------------------------------------------------------------------------------------------------------------------------------------------------------------------------------------------------------------------------------------------------------------------------------------------------------------------------------------------------------------------------------------------------------------------------------------|------------------------------------------------------------------------------------------------------------------------------------------------------------------|--------------------------------------------------------------------------------------------------------------|
| Winstone Nyandiko, 2022   | HIV-1-infected children and adolescents in Western Kenya who were perinatally infected, under 14 years of age or beginning NNRTI-based 1st-line ART in 2010. The study included 480 participants, with a median age of 8 years.                                                       | Continuation of first-line NNRTI-based ART with the following regimens:<br>- ABC + 3TC + EFV/NVP<br>- AZT + 3TC + EFV/NVP<br>- D4T + 3TC + EFV/NVP<br>Participants with VL >1000 copies/mL underwent genotypic resistance testing to monitor DRMs.                                                                                                                                                                                                                                                                          | Different ART regimens and their association with virological failure and clinical outcomes, including the impact of DRMs on second-line ART effectiveness.      | Prevalence of DRMs, particularly resistance to NRTIs and NNRTIs, and the impact on second-line ART outcomes. |
| Barbara S. Taylor, 2011   | HIV-1-infected children (< 24 months of age) and adolescents in Johannesburg and South Africa, either prior to ART start or after ART start if they had recently initiated ART, were receiving a first-line PI-based regimen, and had not had any changes to this first-line regimen. | Initiation of PI-based ART, primarily with the following regimens:<br>- LPV/r-based ART: Used for children over 6 months of age and those not receiving TB treatment.<br>- RTV-based ART: Used for children under 6 months of age or those receiving TB treatment.<br>Genotypic resistance testing was conducted for children who did not achieve HIV-1 plasma RNA <400 copies/ml by 52 weeks.                                                                                                                              | LPV/r-based ART versus RTV-based ART, including virological outcomes and resistance profiles.                                                                    | Prevalence of DRMs, particularly PI-related mutations, and the impact on virological suppression.            |
| Djeneba B. Fofana, 2023   | HIV-1-infected children aged less than 15 years in West African, Mali and Benin. The study involved 107 children, with a median age of 10 years for ART-treated children.                                                                                                             | The ART regimens included:<br>- NNRTI-based: 3TC + (ZDV or ABC) + NVP or EFV<br>- NRTI+PI-based: TDF + (3TC or FTC or ABC) + LPV/r<br>Genotypic sequencing was conducted on DBS collected from ART-treated children with virological failure.                                                                                                                                                                                                                                                                               | Comparison of integrase RAMs between ART-naïve and ART-treated children. The study also compared the prevalence of integrase polymorphisms between these groups. | Prevalence of natural polymorphisms and RAMs associated with integrase inhibitors.                           |
| German A. Contreras, 2013 | Perinatally HIV-infected children and adolescents who received routine care at UTHouston in the United States in 2009. The study involved 66 patients with a history of ART and resistance testing.                                                                                   | Analysis of the prevalence of resistance-associated mutations to etravirine (RAM) among children and adolescents. The ART regimens included:<br>- NRTI-based regimens: with history of exposure to NRTIs.<br>- Protease inhibitor-based regimens: with history of exposure to PIs.<br>- NNRTI-based regimens: specifically including nevirapine or efavirenz, with some patients exposed to both drugs.<br>The study also evaluated the factors associated with the presence of RAM, such as CD4% and history of NNRTI use. | Children with versus without RAM, association with previous NNRTI use (especially nevirapine), and prevalence across different birth cohorts and ethnic groups.  | Prevalence of etravirine among the cohort and the identification of risk factors associated with RAM.        |

|                             |                                                                                                                                                                                                                                                                                                                                        |                                                                                                                                                                                                                                                                                                                             |                                                                                                                                                                                                                   |                                                                                                                                                                                                                   |
|-----------------------------|----------------------------------------------------------------------------------------------------------------------------------------------------------------------------------------------------------------------------------------------------------------------------------------------------------------------------------------|-----------------------------------------------------------------------------------------------------------------------------------------------------------------------------------------------------------------------------------------------------------------------------------------------------------------------------|-------------------------------------------------------------------------------------------------------------------------------------------------------------------------------------------------------------------|-------------------------------------------------------------------------------------------------------------------------------------------------------------------------------------------------------------------|
| Constance Delaugerre, 2007  | HIV-1-infected children treated with ART who experienced virological failure (defined as HIV-1 RNA > 500 copies/mL) at Necker Hospital, Paris, France in 2007. The population included children born between 1983 and 2003, with a median age of 12 years.                                                                             | Analysis of genotypic resistance profiles following virological failure. This included the detection of resistance mutations to NRTIs, NNRTIs, and PIs. The study focused on identifying risk factors associated with resistance, including the number of prior ART drugs, viral load, and demographic factors like gender. | Children with versus without resistance to ART drugs, and resistance to different ART classes (NRTIs, NNRTIs, PIs), including factors like age, gender, and ART history.                                          | Prevalence of drug resistance, resistance to NRTIs, resistance to NNRTIs, resistance to PIs, association with viral load, association with the number of PIs, gender differences, triple-class resistance.        |
| Allison L. Agwu, 2014       | HIV-1-infected children and youth enrolled in the LEGACY cohort across the United States and Puerto Rico in 2005, with documented NNRTI resistance (NNRTI-R). The study included 133 participants with a median age of 10.1 years, predominantly Black, non-Hispanic, and infected perinatally.                                        | Recycling of NNRTI-based regimens despite documented NNRTI-R. This involved restarting NNRTI therapy after a median of 402 days from the first detection of NNRTI-R, with a median duration of 370 days on the recycled regimen.                                                                                            | Participants who recycled NNRTIs versus those who did not, focusing on adherence, CD4 count, specific NNRTI mutations (e.g., K103N), and virologic suppression outcomes.                                          | Virologic suppression (VL < 400 copies/mL) at 24 weeks post-recycling, CD4 count changes, and the development of additional NNRTI-R mutations.                                                                    |
| Seth C. Inzaule, 2016       | HIV-1-infected infants in the Kisumu Breastfeeding Study (KiBS) in Kenya in 2003, whose mothers were on a triple-antiretroviral regimen of zidovudine (AZT), lamivudine (3TC), and either nevirapine (NVP) or nelfinavir (NFV) during breastfeeding. The study involved 24 infants who acquired HIV-1 during the study period.         | Mother: NFV/ZDV/3TC from 34 weeks of gestation to 6 months post-partum<br>children: sdNVP within 72h of birth, then breastfeeding                                                                                                                                                                                           | Infants with versus without the K65R mutation, focusing on CD4 cell counts, timing of DRM emergence, and presence of multiclass resistance.                                                                       | Development of K65R mutation, association with lower baseline CD4 counts, early emergence of DRMs, multiclass drug resistance, disappearance of K65R by 6 to 9 months, impact on future NRTI-based ART responses. |
| Cissy Kityo, 2017           | HIV-1-infected children aged ≤12 years in Uganda in 2010, initiating first-line ART between January 2010 and August 2011. The study enrolled 317 children from three Joint Clinical Research Center (JCRC) Regional Centers of Excellence (RCEs) in Kampala, Mbale, and Fort Portal, Uganda.                                           | The study evaluated the impact of PDR on virological outcomes. Children initiated on first-line ART, primarily NNRTI-based regimens, with follow-up for 24 months, including viral load (VL) monitoring and genotypic resistance testing.                                                                                   | Children with and without PDR were compared in terms of VF and the accumulation of additional resistance mutations (ADR).                                                                                         | Association between PDR and increased likelihood of VF and ADR, prevalence of VF within 24 months, PDR as a strong predictor of VF and ADR.                                                                       |
| Sandra Soeria-Atmadja, 2020 | ART-naïve Ugandan children aged 3-12 years, initiating efavirenz-based ART between February 2015 and February 2016. The study included 99 children from an urban cohort, primarily from families living within a 50 km radius of Kampala, Uganda.                                                                                      | The study assessed the prevalence of PDR and its association with virological outcomes after 24 weeks of efavirenz-based ART. Baseline and 24-week assessments included VL and genotypic drug resistance testing for NRTI and NNRTI.                                                                                        | Children with and without PDR were compared regarding virological suppression, the development of acquired drug resistance, and accumulation of new drug resistance mutations (DRMs) after 24 weeks of treatment. | Baseline PDR prevalence, association with odds of viremia, accumulation of new DRMs, viral suppression rates by week 24.                                                                                          |
| Podjane Jittamala, 2009     | HIV-1-infected children aged less than 18 years who were antiretroviral drug-naïve before initiation of NNRTI-based ART in 2017, except for exposure to antiretroviral prophylaxis for mother-to-child transmission. The study involved 202 children from Thailand, enrolled from four hospitals between August 2002 and October 2006. | NNRTI-based antiretroviral therapy, primarily using nevirapine (NVP)-based regimens, with some children receiving efavirenz (EFV)-based regimens. Clinical, immunologic, and virologic outcomes were assessed, with HIV RNA and CD4 monitored every 6 months.                                                               | NVP-based regimens (d4T+3TC+NVP) versus EFV-based regimens (3TC+d4T+AZT).                                                                                                                                         | Virologic failure rates, comparison of failure risk between NVP-based and EFV-based regimens, common resistance mutations identified.                                                                             |

|                        |                                                                                                                                                                                                                                                               |                                                                                                                                                                                                                                                                                                                                      |                                                                                                                                                                                                                          |                                                                                                                                                                                                                            |
|------------------------|---------------------------------------------------------------------------------------------------------------------------------------------------------------------------------------------------------------------------------------------------------------|--------------------------------------------------------------------------------------------------------------------------------------------------------------------------------------------------------------------------------------------------------------------------------------------------------------------------------------|--------------------------------------------------------------------------------------------------------------------------------------------------------------------------------------------------------------------------|----------------------------------------------------------------------------------------------------------------------------------------------------------------------------------------------------------------------------|
| Syed Hani Abidi, 2021  | Children aged 0-15 years who were part of an extensive HIV-1 outbreak in Pakistan, between April and June 2019. A total of 401 blood samples were collected, with 344 samples successfully sequenced for HIV-1 subtype and drug resistance mutation analysis. | Phylogenetic and drug-resistance analysis of HIV-1 sequences, specifically focusing on subtype distribution, transmission clusters, and DRM. Bayesian and maximum-likelihood phylogenetic methods were used to determine subtype distribution, identify clusters, and estimate the time to the most recent common ancestor (tMRCA).  | HIV-1 sequences from the outbreak versus sequences from high-risk groups in Pakistan (PWID and MSM), focusing on phylogenetic relationships and DRMs.                                                                    | Clusters of HIV-1 transmission, presence of drug resistance mutations, common HIV-1 strains (CRF02_AG, subtype A1), resistance in RT genes, potential challenges for treatment due to resistant strains                    |
| Bhavna H. Chohan, 2015 | HIV-1-infected Kenyan infants less than 5 months old who were not previously exposed to NVP for PMTCT in 2007. A total of 22 infants initiated on NVP-based ART were followed for 12 months.                                                                  | Nevirapine-based antiretroviral therapy (NVP-ART) was administered to the infants in a dose-escalation strategy, combined with two NRTIs, either lamivudine and zidovudine (NVP/3TC/AZT) or lamivudine and abacavir (NVP/3TC/ABC).                                                                                                   | Development of NVP resistance in NVP-unexposed infants over 12 months, focusing on resistance association with virologic failure, viral load, HIV-1 subtype, and adherence.                                              | NVP resistance development, detection timeline (3 to 6 months), association with higher viral loads, virologic failure, comparison of viral loads in infants with and without NVP resistance.                              |
| Anita Shet, 2013       | HIV-1-infected children in India less than 16 years old on first-line ART in 2007. A total of 80 children were included, with 68 achieving virologic suppression and 12 experiencing virologic failure.                                                       | First-line ART including pediatric fixed-dose combination pills. The ART regimens were based on NRTIs and NNRTIs. 2 NRTI (zidovudine/stavudine + lamivudine) + 1 NNRTI (nevirapine or efavirenz)                                                                                                                                     | Children on first-line ART with virologic suppression versus those with virologic failure, focusing on associated drug resistance mutations.                                                                             | Virologic suppression rate, presence of resistance-associated mutations, M184V mutation, thymidine analogue mutations (M41L, T215Y/F/I), NNRTI mutations (K103N/R, Y181C, G190A).                                          |
| Theodore D, 2011       | HIV-1-infected Ugandan children (n=120) starting ART in 2010.                                                                                                                                                                                                 | First-line ART, including regimens based on NVP or EFV combined with 3TC and either ZDV) or D4T.NVP/3TC/ZDV 19 (16%), NVP/3TC/D4T 17 (14%), EFV/3TC/ZDV 73 (61%), EFV/3TC/ZDV 7(6%), 4 (3%) children ABC/ZDV/3TC for concurrent anti-tuberculosis therapy, then changed to NVP/ZDV/3TC after 154-237 days of ARV therapy             | Comparison of virologic outcomes in children with early virological failure (EVF) versus those without EVF, and the evolution of ARV resistance mutations over time.                                                     | Extended virologic failure (EVF), persistent viremia, reverse transcriptase mutations (M184V, NNRTI-associated mutations), thymidine analog mutations (TAMs) after 12 months of virologic failure.                         |
| Liting Yan, 2022       | HIV-1-infected children and adolescents less than 15 years old in China in 2019, receiving long-term antiretroviral therapy (ART) from five different centers, with a median ART duration of 10 years.                                                        | Genotypic resistance testing for those identified with virological failure (VF) (viral load (VL) $\geq$ 400 copies/mL) after long-term ART.ZDV + 3TC + NVP/EFV 17 (18.3)<br>TDF + 3TC + EFV 13 (14.0)<br>ZDV + 3TC +LPV/r 21 (22.6)<br>ABC + 3TC + LPV/r 26 (27.9)<br>TDF + 3TC + LPV/r 13 (14.0)<br>ABC + ZDV + 3TC + LPV/r 3 (3.2) | Comparison between participants with DRMs and those without, based on various factors such as age at ART initiation, ART regimen, and HIV subtype.                                                                       | Major DRM presence, NNRTI resistance, NRTI resistance, PI resistance, younger age at ART initiation, subtype B association, NNRTI-based regimen association, continued virologic failure, accumulation of major mutations. |
| Yan Zhao, 2011         | HIV-1-infected children from rural China experiencing virologic failure to first-line antiretroviral therapy regimens and who were part of a national pediatric antiretroviral therapy program in 2005.                                                       | Switching to a second-line antiretroviral therapy regimen after experiencing virologic failure on the first-line regimen.Regimen at enrollment of resistance test, AZT/D4T + 3TC + NVP, AZT/D4T + 3TC + EFV, AZT/D4T + ddi + NVP. Second-line regimen, ABC + 3TC + LPV/r, AZT + 3TC + LPV/r, ABC + 3TC + AZT +                       | Comparison between the effectiveness of second-line regimens (including boosted protease inhibitors) after switching from failing first-line regimens, focusing on drug resistance profiles before and after the switch. | Resistance to nevirapine, resistance to efavirenz, undetectable viral loads after switching to second-line therapy, increases in CD4 counts.                                                                               |

|                              |                                                                                                                                                                                                                                                                                                                   |                                                                                                                                                                                                                                                                                                                                                                                                                                                                                                                        |                                                                                                                                                                                                                                                                                                                                                                              |                                                                                                                                                                                         |
|------------------------------|-------------------------------------------------------------------------------------------------------------------------------------------------------------------------------------------------------------------------------------------------------------------------------------------------------------------|------------------------------------------------------------------------------------------------------------------------------------------------------------------------------------------------------------------------------------------------------------------------------------------------------------------------------------------------------------------------------------------------------------------------------------------------------------------------------------------------------------------------|------------------------------------------------------------------------------------------------------------------------------------------------------------------------------------------------------------------------------------------------------------------------------------------------------------------------------------------------------------------------------|-----------------------------------------------------------------------------------------------------------------------------------------------------------------------------------------|
|                              |                                                                                                                                                                                                                                                                                                                   | LPV/r                                                                                                                                                                                                                                                                                                                                                                                                                                                                                                                  |                                                                                                                                                                                                                                                                                                                                                                              |                                                                                                                                                                                         |
| Clara Bratholm, 2010         | HIV-1-infected children under 15 years who received long-term antiretroviral treatment at Haydom Lutheran Hospital in rural Tanzania in 2009.                                                                                                                                                                     | First-line NNRTI-based ART regimen with regular monitoring of virological response and genotypic resistance testing for those with viral load >200 copies/mL. zidovudine/lamivudine/nevirapine 7(36%), stavudine/lamivudine/nevirapine 7(36%), zidovudine/lamivudine/efavirenz 4 (21%), stavudine/lamivudine/efavirenz 1(5%).                                                                                                                                                                                          | Comparison between virologically suppressed children and those with clinically relevant drug resistance mutations after long-term ART.                                                                                                                                                                                                                                       | Virological suppression, drug resistance mutations, resistance to NRTIs and NNRTIs                                                                                                      |
| Ravindra K. Gupta, 2010      | HIV-1-infected Zambian children on adult fixed-dose combination cART (stavudine, lamivudine, nevirapine) in 2003 with a median age of 8 years.                                                                                                                                                                    | Administration of adult fixed-dose combination antiretroviral therapy (cART) consisting of D4T+3TC+NVP (Triomune30), dosed according to WHO guidelines.                                                                                                                                                                                                                                                                                                                                                                | Children with previous ART exposure versus those without, and children with different levels of drug resistance.                                                                                                                                                                                                                                                             | Viral suppression, virologic failure, NNRTI resistance, M184V mutations, thymidine analogue mutations (TAM), resistance to NNRTI and lamivudine.                                        |
| Jean-Christophe Beghin, 2020 | HIV-1-infected South African children under 2 years old in 2014. This group includes infants and toddlers who were diagnosed with HIV and initiated on combination antiretroviral therapy (cART) shortly after diagnosis.                                                                                         | Treatment with NRTI + 1 PI regimen.<br>- Initial cART Regimens: Lopinavir/ritonavir + Stavudine + Lamivudine, Lopinavir/ritonavir + Zidovudine + Lamivudine.<br>- Updated Regimens in 2014: Lopinavir/ritonavir + Abacavir + Lamivudine, Lopinavir/ritonavir + Zidovudine + Lamivudine, Lopinavir/ritonavir + Tenofovir + Lamivudine, Efavirenz + Abacavir + Zidovudine, Efavirenz + Abacavir + Lamivudine, Efavirenz + Lopinavir/ritonavir + Abacavir + Zidovudine.                                                   | NRTI + 1 PI regimens at initiation of cART versus subsequent treatments, including the impact of switching from Stavudine or Zidovudine to Abacavir or Tenofovir on virologic suppression, CD4% recovery, and drug resistance development.                                                                                                                                   | Virologic suppression rates, CD4% increases, and development of drug resistance mutations, focusing on the effectiveness and resistance profiles associated with NRTI + 1 PI regimens.  |
| Jean-Christophe Beghin, 2020 | HIV-1-infected South African children under 2 years old in 2014. This population consists of very young children, including those diagnosed at birth or within the first few months of life. The children are from diverse backgrounds, receiving treatment in various healthcare facilities across South Africa. | Treatment with NRTI + NNRTI regimen.<br>- Initial cART Regimens: Lopinavir/ritonavir + Stavudine + Lamivudine, Efavirenz + Stavudine + Lamivudine, Efavirenz + Abacavir + Lamivudine.<br>- Updated Regimens in 2014: Lopinavir/ritonavir + Abacavir + Lamivudine, Lopinavir/ritonavir + Zidovudine + Lamivudine, Lopinavir/ritonavir + Tenofovir + Lamivudine, Lopinavir/ritonavir + Abacavir + Zidovudine, Efavirenz + Abacavir + Lamivudine, Efavirenz + Tenofovir + Lamivudine, Efavirenz + Stavudine + Lamivudine. | Different NRTI + NNRTI regimens at cART initiation, including switches between Stavudine and Tenofovir or Zidovudine and Abacavir, focusing on virologic response and immune recovery. It also compares NNRTI-based regimens (especially Efavirenz) versus PI-based regimens for maintaining viral suppression, improving CD4 counts, and minimizing resistance development. | Virologic suppression rates, CD4% increases, and development of drug resistance mutations, focusing on the effectiveness and resistance profiles associated with NRTI + NNRTI regimens. |

|                             |                                                                                                                                                                                                                                                                                                                                                                                                                                              |                                                                                                                                                                                                                                                                                                                                                                                                                                        |                                                                                                                                                                                                                                       |                                                                                                                               |
|-----------------------------|----------------------------------------------------------------------------------------------------------------------------------------------------------------------------------------------------------------------------------------------------------------------------------------------------------------------------------------------------------------------------------------------------------------------------------------------|----------------------------------------------------------------------------------------------------------------------------------------------------------------------------------------------------------------------------------------------------------------------------------------------------------------------------------------------------------------------------------------------------------------------------------------|---------------------------------------------------------------------------------------------------------------------------------------------------------------------------------------------------------------------------------------|-------------------------------------------------------------------------------------------------------------------------------|
| Judit Ventosa-Cubillo, 2023 | HIV-1-infected children aged less than 18 years in Panama, who were part of a the mother-to-child transmission of HIV program. The study involved 107 children, with a median age of 10 years for ART-treated children.                                                                                                                                                                                                                      | The ART regimens included: - NNRTI-based: 3TC + (ZDV or ABC) + NVP or EFV - NRTI+PI-based: TDF + (3TC or FTC or ABC) + LPV/r. Genotypic sequencing was conducted on DBS collected from ART-treated children with virological failure.                                                                                                                                                                                                  | Integrase RAMs and polymorphisms between ART-naïve and ART-treated children.                                                                                                                                                          | Prevalence of natural polymorphisms and RAMs associated with integrase inhibitors.                                            |
| Lukas Muri, 2017            | HIV-1-infected children and adolescents aged 18 years or less, from rural Tanzania, attending the paediatric HIV Clinic of Ifakara in 2016. The study involved 213 children on ART for at least 12 months. The median age was 11 years, and the median time on ART was 4.45 years. Some children had prior ART exposure, excluding PMTCT.                                                                                                    | The ART regimens included NNRTI-based and PI-based treatments. Initial regimens consisted mostly of ZDV/3TC with NNRTI (54.9%) or d4T/3TC with NVP (39%). 15% of the children were on a PI-based regimen at the time of investigation.                                                                                                                                                                                                 | Comparison of virologic failure and acquisition of DRMs between children on NNRTI-based and PI-based ART regimens.                                                                                                                    | Virologic failure, prevalence of HIV-DRM, multiclass resistances.                                                             |
| Paula Vaz, 2018             | HIV-1-infected children aged 1 to 14 years on ART for $\geq 12$ months from Mozambique in 2013. The study involved 715 children, with a mean age of 103 months and a mean time on ART of 60 months. Approximately 20.1% had a history of exposure to the PMTCT of HIV. Children were included if they had been on ART for at least 12 months.                                                                                                | Children were treated with first-line ART regimens, primarily using fixed-dose combinations containing d4T, 3TC, and NVP. Viral load testing was performed, and for those with $\geq 1000$ copies/mL, genotyping was conducted to assess drug resistance mutations.                                                                                                                                                                    | Children with virologic failure (VL $\geq 1000$ copies/mL) versus those with suppressed viral loads, including prevalence of drug resistance mutations and effectiveness of standard second-line ART regimens.                        | Virologic failure, drug resistance mutations, compromised efficacy of second-line ART, effectiveness of drugs in the regimen. |
| A.T. Makadzange, 2015       | HIV-1-infected children and adolescents aged 0-19 years in Zimbabwe in 2012, enrolled between 2004 and 2011. The participants were part of a public ART program at Parirenyatwa Hospital Family Care Center (PHFCC), Harare. The median age at ART initiation was 8 years. The study included children with a history of advanced clinical disease (WHO stages 3 and 4), with many participants having experienced severe immunosuppression. | The intervention primarily involved first-line ART regimens, with a significant proportion of the participants on a Nevirapine-based regimen (82.6%). Zidovudine and Stavudine were also commonly used in the NRTI backbone. Protease inhibitors were used for infants and in cases of treatment failure, with all children and adolescents on a PI-based regimen receiving Lopinavir/ritonavir. The median time on ART was 2.9 years. | Different age groups (children vs. adolescents) in terms of virologic and immunologic outcomes, impact of age at ART initiation and duration of ART on virologic failure, and outcomes based on Nevirapine versus other ART regimens. | Virologic failure, drug resistance mutations, compromised efficacy of second-line ART, effectiveness of drugs in the regimen. |
| George A. Yendewa, 2021     | HIV-1-infected children, adolescents, and pregnant women in Sierra Leone in 2019. This study involved 96 children (age 2–9 years, median age 5), 47 adolescents (age 10–18 years, median age 13), and 54 pregnant women (age $>18$ years, median age 26). All children and adolescents acquired HIV through mother-to-child transmission, and 72.2% of the pregnant women were ART-experienced.                                              | ART regimens included: NRTI + NNRTI-based (TDF + 3TC + EFV, AZT+ 3TC+ EFV, AZT+ 3TC+ NVP, AZT+ 3TC+ LPV/r ) and NRTI + PI-based (ABC+ 3TC+ EFV, ABC+ 3TC+ NVP, ABC+ 3TC+ LPV/r). Genotypic sequencing was conducted on plasma samples collected from ART-experienced patients.                                                                                                                                                         | Drug resistance mutations across different age groups and ART regimens, and prevalence of RAMs between ART-naïve and ART-experienced patients.                                                                                        | Prevalence of drug resistance mutations to NRTIs, NNRTIs, and PIs.                                                            |
| Josephine Brice, 2020       | HIV-1-infected children in Mali, with ages ranging from infancy to under 20 years old, involved in a cross-sectional study conducted from August 2013 to April 2014. The children were part of the Prevention of Mother-to-Child Transmission (PMTCT) program and had been on ART for more than 6 months with                                                                                                                                | The ART regimens included: 2 NRTIs + 1 NNRTI (most commonly, combinations such as Zidovudine + Lamivudine + Nevirapine, or Abacavir + Lamivudine + Efavirenz) and 2 NRTIs + 1 PI (commonly Abacavir + Lamivudine + Lopinavir). Genotypic resistance testing was                                                                                                                                                                        | Presence of RAMs and defective viral populations between children with different ART regimens, including the genotypic susceptibility score (GSS) for each regimen.                                                                   | HIV-1 resistance in DNA, resistance to NRTIs and NNRTIs.                                                                      |

|                             |                                                                                                                                                                                                                                                                                                                                                                                                                                                                                 |                                                                                                                                                                                                                                                                                                                                                                                        |                                                                                                                                                                                                                                                                                           |                                                                                                                                                                                   |
|-----------------------------|---------------------------------------------------------------------------------------------------------------------------------------------------------------------------------------------------------------------------------------------------------------------------------------------------------------------------------------------------------------------------------------------------------------------------------------------------------------------------------|----------------------------------------------------------------------------------------------------------------------------------------------------------------------------------------------------------------------------------------------------------------------------------------------------------------------------------------------------------------------------------------|-------------------------------------------------------------------------------------------------------------------------------------------------------------------------------------------------------------------------------------------------------------------------------------------|-----------------------------------------------------------------------------------------------------------------------------------------------------------------------------------|
|                             | <p>virological suppression (HIV-1 RNA <math>\leq</math> 50 copies/mL). The median age at the time of inclusion was 9.9 years, and the median duration of ART was 5.5 years.</p>                                                                                                                                                                                                                                                                                                 | <p>performed on DNA from dried blood spots (DBS).</p>                                                                                                                                                                                                                                                                                                                                  |                                                                                                                                                                                                                                                                                           |                                                                                                                                                                                   |
| Vaz, Paula, 2009            | <p>HIV-1-infected children under 15 years old in Mozambique, treated between December 2003 and September 2007. The study involved 512 children who received first-line ART for at least 6 months, with a median age of 49 months at treatment initiation. Among them, some had a history of perinatal prophylaxis (PMTCT), and 135 children experienced virological failure (VF), defined as HIV-1 RNA <math>&gt;</math>50 copies/mL.</p>                                       | <p>The ART regimen included NNRTI-based therapy: Nevirapine combined with 2 NRTIs (Stavudine or Zidovudine and Lamivudine). Genotypic resistance testing was performed on available samples from children with virological failure.</p>                                                                                                                                                | <p>Presence and pattern of resistance mutations between children with virologic failure (VF) treated for different durations, including extended resistance to drugs not previously administered, and resistance patterns in children with shorter versus longer treatment durations.</p> | <p>Resistance to Lamivudine and Nevirapine, extended spectrum of resistance, resistance to Abacavir, Tenofovir, and Etravirine.</p>                                               |
| M. Sylla, 2019              | <p>The study involved HIV-1-infected children less than 18 years of age who were infected with HIV-1 and receiving second-line ART for at least 6 months in Mali, receiving second-line ART. These children were enrolled from November 2013 to August 2014 at Gabriel Touré Hospital in Bamako. All children included in the study were experiencing virological failure (VF), defined as a viral load <math>\geq</math> 1000 copies/mL after 6 months on second-line ART.</p> | <p>The intervention involved sequencing the protease and reverse transcriptase genes from children experiencing VF on second-line ART. The first-line regimens: d4T + 3TC + NVP, AZT + 3TC + NVP. second-line regimens: ABC + 3TC + LPV/r, ddI + ABC + LPV/r</p>                                                                                                                       | <p>The study compared the prevalence and patterns of drug resistance mutations in the children, focusing on mutations associated with NRTIs, NNRTIs, and PIs.</p>                                                                                                                         | <p>Resistance to NRTIs, NNRTIs, and PIs, common presence of the M184V mutation, continued activity of LPV/r despite second-line ART failure.</p>                                  |
| P. Vaz, 2012                | <p>HIV-1-infected children aged <math>\leq</math>13 years in Mozambique, enrolled between 2007 and 2008 at the Pediatric Day Hospital (HDP) in Maputo. This study involved 119 children, with a median age of 25.2 months. 50% were aged <math>&lt;</math>18 months, and 13 children had maternal or child PMTCT exposure. All children were in WHO clinical stages III or IV at the time of ART initiation, and 48% were severely immunocompromised.</p>                       | <p>First-line ART regimens included: ZDV or d4T in combination with 3TC and either NVP or EFV. A small number of children (2 of 119) received a boosted PI regimen (Lopinavir/ritonavir + ZDV + 3TC).</p>                                                                                                                                                                              | <p>Virological outcomes at 12 months after ART initiation, comparing children with HIV drug resistance mutations and viral load suppression (<math>&lt;</math>1000 copies/mL) versus those with virologic failure (VF).</p>                                                               | <p>Viral suppression at 12 months, presence of HIVDR mutations, dual class resistance (NRTI and NNRTI), predictors including maternal ARV exposure for PMTCT, baseline HIVDR.</p> |
| Patricia A. Brindeiro, 2002 | <p>HIV-1-infected children aged 2 to 14 years in Brazil (specifically in Rio de Janeiro and São Paulo), from April 1999. All children were vertically infected with HIV. Most children were undergoing highly active antiretroviral treatment with some on dual-nucleoside reverse transcriptase inhibitor therapy. A significant number of children had virological failure. No specific information is provided on whether the children were exposed to PMTCT.</p>            | <p>The study involved testing genotypic and phenotypic resistance to ARV therapy in children who were failing their treatment. Plasma samples were collected for HIV-1 pol gene sequencing and phenotyping. The children were receiving various ARV regimens, including dual-NRTI therapy and HAART, with specific drugs like AZT, 3TC, and various PIs such as ritonavir and NFV.</p> | <p>Genotypic resistance patterns and phenotypic resistance profiles in children infected with different HIV-1 clades (B versus non-B), focusing on resistance mutations and their impact on treatment outcomes.</p>                                                                       | <p>Primary mutations conferring resistance to ARV drugs, differences in secondary resistance mutations between B and non-B subtypes.</p>                                          |



|                                    |                                                                                                                                                                                                                                                                                                                                                                                                                                    |                                                                                                                                                                                                                                                                                                                                                                                                              |                                                                                                                                                                                                                                                   |                                                                                                                                                                    |
|------------------------------------|------------------------------------------------------------------------------------------------------------------------------------------------------------------------------------------------------------------------------------------------------------------------------------------------------------------------------------------------------------------------------------------------------------------------------------|--------------------------------------------------------------------------------------------------------------------------------------------------------------------------------------------------------------------------------------------------------------------------------------------------------------------------------------------------------------------------------------------------------------|---------------------------------------------------------------------------------------------------------------------------------------------------------------------------------------------------------------------------------------------------|--------------------------------------------------------------------------------------------------------------------------------------------------------------------|
| Christiane Adjé-Touré, 2008        | HIV-1-infected children aged 0–15 years in Côte d'Ivoire, between 1998 and 2003. A total of 134 children were included in the study who had initiated ART and remained on treatment for approximately 1 year. The median age was 7 years, and 25% were less than 4 years old at treatment initiation. PMTCT was not explicitly mentioned.                                                                                          | The study involved ART regimens primarily consisting of two reverse transcriptase inhibitors (ZDV, ddI, d4T, 3TC) combined with either one protease inhibitor (nelfinavir) or one NNRTI (efavirenz).                                                                                                                                                                                                         | The study compared the virologic and immunologic responses to ART, as well as the development of drug resistance among children receiving these regimens.                                                                                         | Changes in viral load, CD4 T cell percentage, incidence of drug resistance.                                                                                        |
| Paul Alain Tagnouokam -Ngoup, 2021 | HIV-1-infected children under 15 years old in Cameroon, enrolled in the ANRS 12225-PEDIACAM cohort study between November 2007 and October 2011. The cohort included 210 children born to HIV-infected mothers, with 155 included in the final analysis. The median age at cART initiation was 4.2 months. Approximately 61.3% received PMTCT prophylaxis at birth, and 47.1% were born to mothers who received PMTCT prophylaxis. | The study primarily focused on the administration of cART with regimens including AZT/3TC/LVP/r, 3TC/D4T/LVP/r, AZT/3TC/NVP, and 3TC/D4T/NVP. Follow-up included regular viral load measurements and drug resistance testing for five years.                                                                                                                                                                 | Comparison was made between different ART regimens (e.g., LPV/r-containing regimens vs. NVP-containing regimens) and their effectiveness in preventing VF and drug resistance.                                                                    | Occurrence of virological failure, presence of drug resistance mutations, duration between cART initiation and VF.                                                 |
| Clarisse Amani-Bosse, 2017         | HIV-1-infected children under the age of 2 years, residing in Côte d'Ivoire and Burkina Faso in 2010. These children were ART-naïve except for PMTCT exposure. The study cohort consisted of 156 children, with a median age of 13.9 months at ART initiation, and included children who had experienced virological failure.                                                                                                      | History of antiretroviral drug exposure, n (%) : Prenatal maternal ART 19 (12.2)<br>PMTCT and postnatal maternal ART 11 (7.1) .<br>PMTCT only 50 (32.1)<br>Postnatal maternal ART only 18 (11.5)<br>No previous exposure to any PMTCT or maternal ART 58 (37.2).<br>First-line NRTI backbone, n (%)<br>ZDV-3TC 142 (91.0)<br>ABC-3TC 14 (9.0).                                                               | Outcomes based on variables such as access to tap water, main caregiver (mother vs. father), and socio-economic factors, and the difference in virological suppression rates between children with versus without prior PMTCT exposure.           | Development of antiretroviral resistance mutations among those with virological failure, identification of risk factors for virological failure.                   |
| Laurence Ahoua, 2011               | The study involved HIV-1-infected children aged less than 15 years from rural Uganda. The children were part of a cohort initiated on ART between 2005 and 2006. The majority of the children were 5 years old at the start of the therapy, and most had advanced stages of the disease (clinical stage 3 or 4). Some children had previously been exposed to PMTCT interventions, including single-dose nevirapine.               | The intervention included initiating cART regimens. The majority of children were on a regimen that included NNRTI-based therapy, primarily using NVP with a combination of 3TC and either AZT or d4T. Adjustments were made based on clinical responses, and some children switched to PI-based regimens due to drug resistance or toxicity. ART regimen (%): AZT 3TC NVP 54 (77.1), d4T 3TC NVP 16 (22.9). | Virological and immunological responses between children who maintained viral suppression versus those with virological failure, including a comparison of drug resistance patterns and mutations associated with resistance to NNRTIs and NRTIs. | Virological suppression (HIV RNA < 400 copies/mL), immunological response (CD4 count and percentage), prevalence of drug resistance mutations.                     |
| Laurence Ahoua, 2011               | The study involved HIV-1-infected children aged less than 15 years from rural Uganda. The children were part of a cohort initiated on ART between 2005 and 2006. Most of the children were 5 years old at the start of the therapy, and most had advanced stages of the disease (clinical stage 3 or 4). Some children had previously been exposed to PMTCT interventions,                                                         | The intervention included initiating cART regimens. The majority of children were on a regimen that included NNRTI-based therapy, primarily using NVP with a combination of 3TC and either AZT or d4T. Adjustments were made based on clinical responses, and some children switched to PI-based regimens due to drug resistance or                                                                          | Differences in virological and immunological responses between children who maintained viral suppression versus those with virological failure, and drug resistance patterns, including mutations associated with NNRTI and                       | Virological suppression (HIV RNA < 400 copies/mL), immunological response (CD4 count and percentage), prevalence of drug resistance mutations at 12 and 24 months. |

|                            |                                                                                                                                                                                                                                                                                                                                                                                                                                                                                                                                                                                                            |                                                                                                                                                                                                                                                                                                                                                |                                                                                                                                                                                                                                                                                                                              |                                                                                                                                                                 |
|----------------------------|------------------------------------------------------------------------------------------------------------------------------------------------------------------------------------------------------------------------------------------------------------------------------------------------------------------------------------------------------------------------------------------------------------------------------------------------------------------------------------------------------------------------------------------------------------------------------------------------------------|------------------------------------------------------------------------------------------------------------------------------------------------------------------------------------------------------------------------------------------------------------------------------------------------------------------------------------------------|------------------------------------------------------------------------------------------------------------------------------------------------------------------------------------------------------------------------------------------------------------------------------------------------------------------------------|-----------------------------------------------------------------------------------------------------------------------------------------------------------------|
|                            | including single-dose nevirapine.                                                                                                                                                                                                                                                                                                                                                                                                                                                                                                                                                                          | toxicity. ART regimen (%): AZT 3TC NVP 25 (78.1), d4T 3TC NVP 7 (21.9).                                                                                                                                                                                                                                                                        | NRTI resistance.                                                                                                                                                                                                                                                                                                             |                                                                                                                                                                 |
| Philippe R. Mutwa, 2014    | HIV-1-infected children and adolescents aged 1 to 18 years in Rwanda in 2009. The study was conducted between September 2009 and October 2010. Participants were perinatally infected and were on combination antiretroviral therapy (cART) for a median of 3.4 years. Some had prior exposure to PMTCT, including single-dose nevirapine.                                                                                                                                                                                                                                                                 | cART which included either NNRTI-based regimens (AZT/3TC/NVP, d4t/3TC/NVP) or PI-based regimens (AZT/3TC/EFV, d4T/3TC/EFV) based on Rwandan national guidelines.                                                                                                                                                                               | No direct comparison group. However, the study evaluated outcomes based on different cART regimens and factors such as CD4 count at cART initiation, regimen changes, and exposure to PMTCT.                                                                                                                                 | Long-term effectiveness of cART, virologic failure, genotypic drug resistance mutations, clinical condition, immunologic criteria.                              |
| Tanya Rogo, 2015           | The study involved HIV-1-infected children attending the only pediatric HIV clinic in USA between 1991 and 2012. The cohort consisted of 56 children, including ART-naive and ART-experienced individuals. 64% of the children were perinatally infected, with ages at diagnosis ranging from less than 1 year to over 5 years. A significant proportion (20%) were refugees, and 73% were Black or Hispanic. The study also included children who experienced virologic failure (57% of ART-experienced children).                                                                                        | The study focused on ART regimens given to these children, which included various combinations of NRTIs, NNRTIs, and PIs. ART regimens were individualized, and the study investigated the development of DRMs over time.                                                                                                                      | The study compared virologic outcomes and the development of drug resistance between different ART regimens, as well as between children with different adherence levels, caregiver support, and disclosure of HIV status. It also compared ART-naive children to ART-experienced children regarding the prevalence of DRMs. | Drug resistance, virologic failure, missed appointments and doses.                                                                                              |
| Miguel de Mulder, 2011     | HIV-1-infected children under 18 months, primarily from Spain, with data collected between 1993 and 2009. The majority were perinatally infected, with a high percentage presenting moderate to severe AIDS symptoms. Of these, 85% were receiving ART at the time of sample collection. A subset was infected through PMTCT, with about 96% being perinatally infected. Among the 198 children in the cohort, 67% were infected during the 1990s. The cohort included both ART-naive and ART-experienced children, with 61.6% having received four or more different ART regimens during their follow-up. | The study involved the administration of ART, including regimens based on NNRTIs, NRTIs, and PIs. The resistance analysis was conducted on specimens collected from plasma, PBMCs, and DNA, with sequences analyzed for drug resistance mutations. Treatment regimens varied, and some children were treated with multiple regimens over time. | Comparison of drug resistance mutations between ART-naive and ART-experienced children, as well as between children infected with different HIV-1 subtypes (B and non-B variants). The study also compared the prevalence of drug resistance in children on various ART regimens.                                            | Drug resistance mutations, transmitted DRMs in ART-naive children, resistance mutations in ART-experienced children                                             |
| Joseph E. Fitzgibbon, 2001 | HIV-1-infected children, primarily from the Pediatric AIDS Program at Robert Wood Johnson Medical School, New Brunswick, NJ, USA. The study included 17 children with a mean age of 7.9 years (ranging from 1 to 17 years). All children were experienced with reverse transcriptase inhibitors (RTIs) prior to the study, and two had previous exposure to PIs. There is no mention of whether the children were involved in a PMTCT                                                                                                                                                                      | Nelfinavir-containing regimens combined with various RTIs, including AZT, 3TC, d4T, ddI, and NNRTIs like NVP and DLV. The specific drugs used in combination with nelfinavir varied among the participants. Current therapy: Nelfinavir.                                                                                                       | No direct comparison group was indicated in this study; however, the study did assess the emergence of drug resistance mutations following the initiation of nelfinavir therapy.                                                                                                                                             | Virological response, emergence of drug resistance mutations in protease and reverse transcriptase genes, resistance mutations including D30N, L90M, and M184V. |

|                          |                                                                                                                                                                                                                                                                                                                                                                                                                                                           |                                                                                                                                                                                                                                                                                                                                                           |                                                                                                                                                                                                                                                           |                                                                                                                                                                                                                                                                               |
|--------------------------|-----------------------------------------------------------------------------------------------------------------------------------------------------------------------------------------------------------------------------------------------------------------------------------------------------------------------------------------------------------------------------------------------------------------------------------------------------------|-----------------------------------------------------------------------------------------------------------------------------------------------------------------------------------------------------------------------------------------------------------------------------------------------------------------------------------------------------------|-----------------------------------------------------------------------------------------------------------------------------------------------------------------------------------------------------------------------------------------------------------|-------------------------------------------------------------------------------------------------------------------------------------------------------------------------------------------------------------------------------------------------------------------------------|
|                          | program or had experienced VF prior to the study.                                                                                                                                                                                                                                                                                                                                                                                                         |                                                                                                                                                                                                                                                                                                                                                           |                                                                                                                                                                                                                                                           |                                                                                                                                                                                                                                                                               |
| Compagno Francesca, 2019 | HIV-1-infected children aged under 15 years in Switzerland, part of the Swiss Mother and Child HIV Cohort Study (MoCHIV), born between 1989 and 2009. The study included 22 mother-child pairs, where 95% of mothers were treatment-naïve before pregnancy. The study also accounted for whether ART was administered during pregnancy, with a focus on the rate of VF and DRMs.                                                                          | cART, including various ART regimens provided to the mothers during pregnancy or at delivery, with a focus on assessing the impact of maternal ART on the emergence of drug-resistant mutations in the children. The intervention also included the monitoring and analysis of HIV-1 genotypes and drug resistance profiles in both mothers and children. | The study compared the rate of transmitted drug resistance mutations (HIV-DRM) versus selected drug resistance mutations (HIV-DRM) in the children. It also looked at the effects of ART administration versus no ART during pregnancy on these outcomes. | Prevalence of HIV-DRM and HIV-DRM in the children, with an emphasis on understanding the timing of these mutations' emergence and their impact on virological failure and treatment efficacy.                                                                                 |
| Lisa L. Ross, 2015       | HIV-infected children from North America, Europe, and South Africa, enrolled in 2004, aged 2 to 18 years. Majority of children were ART-experienced before the study, with some having prior exposure to PIs.                                                                                                                                                                                                                                             | ART experience: 3 NRTIs. Children received either unboosted fosamprenavir (FPV) or FPV/ritonavir (FPV/RTV) regimens, with 13 children on FPV and 65 on FPV/RTV.                                                                                                                                                                                           | Not specifically defined; indirect comparison with standard ART regimens in similar populations.                                                                                                                                                          | The incidence of virologic failure (VF) and treatment-emergent mutations in HIV-1 were observed over 48 weeks.                                                                                                                                                                |
| Lisa L. Ross, 2015       | HIV-infected children from South Africa, Mexico, Argentina, and Portugal, enrolled in 2003, aged 4 weeks to <2 years. 30% were ART-naïve at study start, and the rest were ART-experienced, but most were PI-naïve.                                                                                                                                                                                                                                       | All children received FPV/RTV with 2 NRTIs.                                                                                                                                                                                                                                                                                                               | Not specifically defined; indirect comparison with standard ART regimens in similar populations.                                                                                                                                                          | Treatment-emergent mutations.                                                                                                                                                                                                                                                 |
| R. Lwembe, 2007          | HIV-1-infected children in Kenya and Nairobi, aged 1-7 years, born to HIV-1-infected mothers unable to care for them, studied between 2001 and 2004. All were vertically infected with non-subtype B HIV-1 (subtypes A1, C, D, CRF02_AG) and had no prior ART or blood transfusion exposure. PMTCT history is unclear, but nevirapine for PMTCT was not yet in use in Kenya by 2002. These children experienced virological failure after initiating ART. | Various ART regimens including zidovudine/lamivudine/nevirapine, zidovudine/didanosine/efavirenz, and didanosine/lamivudine/abacavir. Some children also received multiple ART regimens over the study period.                                                                                                                                            | Comparison of ART-naïve children with those who received different ART regimens in terms of the emergence and patterns of RAMs, particularly RTI and NNRTI resistance.                                                                                    | Persistence of vertically transmitted NNRTI-resistance mutations in the absence of drug pressure, the emergence of RTI-resistance mutations during treatment, and differences in the patterns of drug resistance between non-subtype B and subtype B HIV-1-infected children. |
| S. H. Al Hajar, 2012     | HIV-infected children aged under 15 years, living in Saudi Arabia and Riyadh, enrolled between July 2006 and January 2009. The study focused on those experiencing VF following first-line highly active antiretroviral therapy. The study included children with a median age of 7 years. There was no specific mention of PMTCT. Among the children, 48% experienced persistent viral load >1000 copies/mL.                                             | The study population received first-line HAART as per the recommended guidelines. The therapy involved various antiretroviral drugs including PIs and RTIs. Genotypic resistance tests were performed on children with virologic failure to optimize subsequent treatment regimens.                                                                       | Not explicitly provided in the study, as it was a retrospective analysis focusing on the prevalence and patterns of antiretroviral resistance in the study population.                                                                                    | Drug resistance prevalence, adherence issues, common mutations in protease and reverse transcriptase regions, cross-resistance to NRTIs.                                                                                                                                      |

|                       |                                                                                                                                                                                                                                                                                                                                                                                                                                                                                                                                                                                                                                                                      |                                                                                                                                                                                                                                                                                                                                                                                                                                              |                                                                                                                                                                                                                                                           |                                                                                                                                             |
|-----------------------|----------------------------------------------------------------------------------------------------------------------------------------------------------------------------------------------------------------------------------------------------------------------------------------------------------------------------------------------------------------------------------------------------------------------------------------------------------------------------------------------------------------------------------------------------------------------------------------------------------------------------------------------------------------------|----------------------------------------------------------------------------------------------------------------------------------------------------------------------------------------------------------------------------------------------------------------------------------------------------------------------------------------------------------------------------------------------------------------------------------------------|-----------------------------------------------------------------------------------------------------------------------------------------------------------------------------------------------------------------------------------------------------------|---------------------------------------------------------------------------------------------------------------------------------------------|
| Z. Makatini, 2019     | Children perinatally infected with HIV in South Africa, attending Dr George Mukhari Academic Hospital (DGMAH) from 2011 to 2017. The cohort included 22 children with a median age of 3 years at cART initiation (IQR 1.25-8.6 years), and all were below 16 years of age at the time of study. Most children were on a failing regimen for a median of 22 months (IQR 6-66 months) and had VF. The study included children exposed to PMTCT regimens, specifically single-dose RTV and 3TC monotherapy.                                                                                                                                                             | Children were managed with a PI-based cART regimen. The most common PI regimen was LPV/r with various NRTI backbones, including ABC + 3TC, AZT + 3TC, AZT + ABC, and d4T + 3TC. All children had evidence of major PI resistance mutations after virological failure on first- or second-line regimens.                                                                                                                                      | Emergence of drug resistance mutations in children exposed to PI-based regimens versus resistance profiles against other antiretroviral options (e.g., atazanavir, darunavir), with a focus on resistance patterns and their impact on treatment options. | Major PI resistance mutations observed, frequent mutations included V82A, M46I/L, and I54V, loss of PI activity.                            |
| M. Camara-Cisse, 2021 | HIV-1-infected children in Côte d'Ivoire, studied between 2012-2013. The study included 61 children, all under 18 years of age, with a median age of 11 years at virological failure. The children were from a national cohort at the Abidjan Integrated Bioclinical Research Centre. The majority of children had been on ART for a median duration of 6 years, with the treatment ongoing for at least 6 months. No specific information was provided regarding exposure to PMTCT interventions. However, the study cohort included children from the first MTCT prevention program. All children had experienced VF with viral loads greater than 1000 copies/mL. | The study focused on evaluating resistance to RTIs in children undergoing ART. Genotypic resistance tests were performed using the ANRS algorithm to assess resistance mutations in the reverse transcriptase gene. The most common treatment regimens included RTIs, with a specific focus on NRTIs and NNRTIs. Children were treated with combinations of NRTIs and NNRTIs, such as ZDV + 3TC + EFV, ABC + 3TC + EFV, and TDF + 3TC + EFV. | Prevalence of resistance mutations in the reverse transcriptase gene among children on ART, focusing on NRTIs and NNRTIs resistance profiles and specific mutations, with additional phylogenetic analysis of HIV-1 viral subtypes.                       | Resistance to RTIs among HIV-1-infected children, including NRTIs and NNRTIs, with common mutations M184V for NRTIs and K103N/S for NNRTIs. |
| A. T. Dumans, 2009    | HIV-1-infected children and adults in Brazil, with samples collected between 1998 and 2005. The study involved 24 children infected with subtype F1, 90 children with subtype B, 141 adults with subtype B, and 99 adults with subtype F1. Patients were on ART and experienced VF after at least 3 months of PI treatment. Data includes demographic details, CD4 counts, viral load, and PI exposure times.                                                                                                                                                                                                                                                        | PI treatment effectiveness in two different HIV-1 subtypes (B and F1). The treatment regimens included various PIs such as RTV, IDV, SQV, and LPV, with differences in exposure times and resistance mutation acquisition.                                                                                                                                                                                                                   | Rate of acquisition of major and minor PI-associated resistance mutations and polymorphisms in HIV-1 subtypes B and F1, analyzing the emergence of specific mutations in treated versus untreated patients.                                               | Differences in the acquisition of resistance mutations between subtypes.                                                                    |
| J. Fokam, 2011        | The study focused on 164 infants (mean age was 72 months in both groups (drug-naïve and those failing first-line treatment, with a range difference (min-max: 3-144 months and 12-144 months, respectively) from the Cameroon between 1991 and 2005. These infants were confirmed or suspected of having congenital toxoplasmosis. None of the mothers received treatment for <i>Toxoplasma gondii</i> during pregnancy (PMTCT not applied). Most infants did not receive postnatal treatment when their serum was obtained.                                                                                                                                         | Diagnostic evaluation of congenital toxoplasmosis using serological tests (IgM, IgA, IgG), PCR, and attempts to isolate the parasite from various samples (CSF, blood, urine). 3TC AZT NVP 51 (26), 3TC D4T NVP 29 (15), 3TC AZT EFV 8 (4), 3TC D4T EFV 4 (2), 3TC AZT ABC 2 (1), 3TC D4T NVP 2 (1), NVP AZT (3TC or D4T) 2 (1), 3TC (D4T NVP) or (ABC AZT) 2 (1)                                                                            | Not explicitly stated as a comparison group, but findings were compared to Africa cohorts where systematic prenatal screening and treatment during pregnancy were implemented. Differences in clinical severity were analyzed.                            | Prevalence of drug resistance                                                                                                               |

|                    |                                                                                                                                                                                                                                                                                                                                                                                                                                                                                                                                                                                        |                                                                                                                                                                                                                                                                                                    |                                                                                                                                                                                                                                                                          |                                                                                                                                                                  |
|--------------------|----------------------------------------------------------------------------------------------------------------------------------------------------------------------------------------------------------------------------------------------------------------------------------------------------------------------------------------------------------------------------------------------------------------------------------------------------------------------------------------------------------------------------------------------------------------------------------------|----------------------------------------------------------------------------------------------------------------------------------------------------------------------------------------------------------------------------------------------------------------------------------------------------|--------------------------------------------------------------------------------------------------------------------------------------------------------------------------------------------------------------------------------------------------------------------------|------------------------------------------------------------------------------------------------------------------------------------------------------------------|
| T. N. Green, 2012  | HIV-1-infected children aged less than 15 years in South Africa, recruited from King Edward VIII hospital in Durban, KwaZulu-Natal. The study was conducted between August 2008 and January 2010. The study included both HAART-failing children (n=51) and HAART-naive children (n=43). Some HAART-naive children had been exposed to antiretroviral therapy for the PMTCT. The median age of HAART-failing children was 7.9 years, while HAART-naive children had a median age of 0.9 years.                                                                                         | The intervention primarily involved HAART regimens, including two NRTIs plus one NNRTI for most children (80.5% of HAART-failing children). Some children (19.5%) were receiving two NRTIs plus one PI. The median duration of HAART prior to study recruitment was 28.6 months.                   | The study compared drug resistance mutations and coreceptor usage between HAART-failing and HAART-naive children. It assessed the prevalence of drug resistance mutations and the usage of CXCR4 (X4) or dual (R5X4)/mixed (R5, X4) (D/M)-tropic viruses in both groups. | Prevalence of drug resistance mutations, presence of TAMs.                                                                                                       |
| S. Pillay, 2014    | The study was conducted on 101 children aged ≤15 years in rural KwaZulu-Natal, South Africa, who were experiencing VF after being on first-line ART. The study period was between August 2011 and December 2012. The children had been on ART for a median of 3.3 years (IQR 2.5-4.4), and the majority were on an NNRTI-based regimen (73 out of 89 successfully genotyped children). The median age at ART initiation was 7 years (IQR 3.7-9.6), and the median age at genotyping was 10.2 years (IQR 7.7-12.9). There was no specific mention of PMTCT drug exposure in the cohort. | The children were on either an NNRTI-based regimen (3TC + d4T/ABC + EFV/NVP) or a PI-based regimen (3TC + d4T/ABC + LPV/r) at the time of genotyping. The study focused on identifying DRMs associated with these regimens.                                                                        | The study compared the prevalence and patterns of DRMs in children failing NNRTI-based regimens versus those failing PI-based regimens. Additionally, it looked at the presence of TAMs and other DRMs, including the Q151M complex and major PI mutations.              | Prevalence of NRTI and NNRTI resistance mutations, and presence of major PI resistance mutations.                                                                |
| G. M. Hunt, 2023   | HIV-positive children aged ≤19 years in South Africa, receiving ART from public health facilities, between March 2017 and March 2019. The study included 899 participants from 40 facilities across eight provinces. The median age was 12.9 years, and participants had been on ART for a median of 1.0 years. About 37.6% had documented exposure to PMTCT, and all participants had VF with at least one viral load ≥1000 copies/mL.                                                                                                                                                | Participants were treated with PI-based regimens (ritonavir-boosted lopinavir or atazanavir), NNRTI-based regimens (primarily efavirenz), or NRTI-based regimens. The intervention included genotypic resistance testing using next-generation sequencing technologies.                            | The study compared the prevalence of drug resistance among children on different ART regimens (PI-based, NNRTI-based, NRTI-based) with virological failure.                                                                                                              | Prevalence of HIV drug resistance, resistance to NNRTIs, NRTIs, and PIs, dual-class resistance, efficacy of PI-based regimens in NNRTI-failing patients.         |
| D. B. Fofana, 2018 | HIV-infected children in Benin, Cotonou, during 2015-2016, with a median age of 10 years (IQR 6–13). 53% were male. These children were on ART for a median of 5 years (IQR 3–7). All participants were experiencing VF defined as two consecutive VL of >1000 copies/mL. No specific mention of PMTCT exposure.                                                                                                                                                                                                                                                                       | Participants were on NNRTI-based or boosted PI-based ART regimens. Resistance testing was conducted on dried blood spots using genotypic methods. NNRTI-based regimens, first-line: 3TC ZDV NVP, 3TC ZDV EFV, 3TC ABC NVP, 3TC ABC EFV, 3TC TDF EFV. PI-based regimens, first-line: 3TC ZDV LPV/r. | Not applicable (the study focused on identifying resistance profiles and treatment outcomes in the population without a direct comparative intervention).                                                                                                                | Prevalence of DRMs for NRTIs, NNRTIs, and dual-class resistance, resistance to PIs and integrase inhibitors, undetectable ARV concentrations associated with VF. |
| J. Servais, 2002   | HIV-1-infected children aged 3 to 16 years in Belgium, enrolled in a multicenter observational study from 1997 to 2000. All children had acquired HIV through PMTCT, with a majority having advanced disease. The study included 21 children, 18 of whom were of African origin. Virological failure was defined as a                                                                                                                                                                                                                                                                  | Switching children from a failing PI-based HAART regimen to a second-line regimen. First-line treatments predominantly involved ritonavir (RTV) with two NRTIs. The second-line regimen involved single or dual PI-based therapy, mainly with NFV or ritonavir-saquinavir (RTV-                    | The study compared the effectiveness of the second-line PI-based therapy after virological failure of the first PI-based regimen. Genotypic and phenotypic resistance testing was used to predict the                                                                    | Virologic response, change in viral load after switching to second-line therapy, presence of resistance mutations, cross-resistance between protease inhibitors. |

|                           |                                                                                                                                                                                                                                                                                                                                                                                                                                                                                                                                                                                                 |                                                                                                                                                                                                                                                                                                                                                                                                                                                                         |                                                                                                                                                                                                                                                                           |                                                                                                                                                                                                                     |
|---------------------------|-------------------------------------------------------------------------------------------------------------------------------------------------------------------------------------------------------------------------------------------------------------------------------------------------------------------------------------------------------------------------------------------------------------------------------------------------------------------------------------------------------------------------------------------------------------------------------------------------|-------------------------------------------------------------------------------------------------------------------------------------------------------------------------------------------------------------------------------------------------------------------------------------------------------------------------------------------------------------------------------------------------------------------------------------------------------------------------|---------------------------------------------------------------------------------------------------------------------------------------------------------------------------------------------------------------------------------------------------------------------------|---------------------------------------------------------------------------------------------------------------------------------------------------------------------------------------------------------------------|
|                           | <1 log <sub>10</sub> decrease in viral load compared with pretreatment values. Most children had prior exposure to NRTIs before starting their first PI-based therapy.                                                                                                                                                                                                                                                                                                                                                                                                                          | SQV), and in some cases, the addition of NVP.                                                                                                                                                                                                                                                                                                                                                                                                                           | response to the second-line therapy.                                                                                                                                                                                                                                      |                                                                                                                                                                                                                     |
| A. P. Ramkissoon, 2015    | HIV-1-infected pediatric patients in Jamaica, with a median age of 10 years, attending the Kingston Pediatric and Perinatal HIV/AIDS Programme. The study includes 55 children, with 75% on first-line ART (NRTI/NNRTI-based regimen) and 25% on second-line ART (PI-based regimen). All participants have been on ART for at least 24 months, and nearly all (98%) experienced virological failure. PMTCT programs were implemented, with 98% of HIV-exposed infants receiving ART.                                                                                                            | First-line ART: NRTI/NNRTI-based regimen (AZT+3TC+NVP, LPV/r+NRTI). Second-line ART: PI-based regimen (ritonavir-boosted lopinavir). The study investigates drug resistance mutations in these pediatric patients.                                                                                                                                                                                                                                                      | Between the frequency and type of resistance mutations in pediatric patients on first-line vs. second-line ART. The study also compares the mutation patterns in Jamaican pediatric patients with those in the adult population.                                          | Frequency of drug resistance mutations, virological failure, common mutations affecting NRTIs and NNRTIs (M184V, T215Y, K103N, Y181C, G190A), resistance to protease inhibitors in patients on second-line therapy. |
| Shanmugam Saravanan, 2017 | HIV-1-infected children aged less than 15 years in India, who have been exposed to ART for at least 24 months. The study involved 55 children, with a median age of 10 years. Most children (75%) were on first-line ART with an NRTI/NNRTI-based regimen (Zidovudine + Lamivudine + Nevirapine). The remaining 25% were on second-line ART with a PI-based regimen (Lopinavir/ritonavir + NRTI backbone). The cohort likely included children who had undergone PMTCT, as indicated by the high prevalence of ART exposure. All but one of the children experienced virological failure (98%). | The primary intervention was ART with either first-line NNRTI-based regimens or second-line PI-based regimens. For the first-line regimen, the most common combination was Zidovudine + Lamivudine + Nevirapine. The second-line regimen typically included Lopinavir/ritonavir with an NRTI backbone. Treatment history: d4T + 3TC + NVP, d4T + 3TC + EFV, AZT + 3TC + NVP, AZT + 3TC + EFV, IDV + 3TC + NVP, ABC + 3TC + NVP, TDF + 3TC + EFV/NVP, TDF/3TC/RTV + ATV. | RAMs in reverse transcriptase and protease genes among children on first-line NNRTI-based regimens versus second-line PI-based regimens, focusing on the prevalence and specific mutations conferring drug resistance.                                                    | Prevalence of DRMs associated with ART regimens, frequency of RAMs in reverse transcriptase and protease genes, significant resistance to NRTIs and NNRTIs, compromised efficacy of ART regimens.                   |
| Bismara BA, 2012          | The study involved 61 vertically HIV-1-infected children from Brazil, specifically followed at the Immunodeficiency Clinic at the State University of Campinas, São Paulo, Brazil. The children had a median age of 7.5 years, with 60.6% being male. The study was conducted in 2012, and all children had been on HAART for at least 6 months. Most had already experienced VF, with a viral load higher than 10,000 copies/ml.                                                                                                                                                               | The intervention included ART regimens using a combination of drugs such as zidovudine, lamivudine, and nelfinavir. The study specifically focused on identifying drug-resistance mutations in the HIV-1 polymerase gene, particularly in the protease and reverse transcriptase regions. ZDV, 3TC, DDC, NEF.                                                                                                                                                           | Prevalence of drug-resistance mutations in the studied HIV-1-infected children and established resistance profiles from other studies. The study also compared the mutation frequencies between different subtypes (B, F, and recombinant forms).                         | Resistance to at least one antiretroviral drug, common mutations in reverse transcriptase gene (M184V, M41L, D67N, T215Y, L210W), common mutations in protease gene (L63P, M36I, L90M).                             |
| Abuogi L, 2023            | HIV-1-infected children aged 1–14 years in Kisumu County, Kenya, enrolled from March 2019 to December 2020. The study included a total of 704 children, with a median age of 9 years (IQR 7, 12). Among the participants, 344 (49%) were female. Some children had exposure to antiretrovirals as part of PMTCT.                                                                                                                                                                                                                                                                                | Point-of-care viral load testing every three months combined with targeted genotypic drug resistance testing for children with VF (HIV RNA ≥ 1000 copies/mL). The intervention included a multidisciplinary committee review of DRT results to offer tailored treatment recommendations.                                                                                                                                                                                | Standard-of-care management following national guidelines for children with VF. This typically included enhanced adherence counseling and repeat VL testing after three months of confirmed adherence. DRT was less commonly used and required approval by a regional HIV | Detection of major HIV drug resistance mutations, viral suppression, loss to follow-up, mortality, association with history of VF, and duration on ART.                                                             |

|                          |                                                                                                                                                                                                                                                                                                                                                                                                                                                                                                         |                                                                                                                                                                                                                                                                                                |                                                                                                                                                                                                                                                                                                                                 |                                                                                                                                                                            |
|--------------------------|---------------------------------------------------------------------------------------------------------------------------------------------------------------------------------------------------------------------------------------------------------------------------------------------------------------------------------------------------------------------------------------------------------------------------------------------------------------------------------------------------------|------------------------------------------------------------------------------------------------------------------------------------------------------------------------------------------------------------------------------------------------------------------------------------------------|---------------------------------------------------------------------------------------------------------------------------------------------------------------------------------------------------------------------------------------------------------------------------------------------------------------------------------|----------------------------------------------------------------------------------------------------------------------------------------------------------------------------|
|                          |                                                                                                                                                                                                                                                                                                                                                                                                                                                                                                         |                                                                                                                                                                                                                                                                                                | Technical Working Group, primarily for those failing a PI-containing regimen or with persistent VF.                                                                                                                                                                                                                             |                                                                                                                                                                            |
| Djiyou ABD, 2023         | HIV-1-infected adolescents aged 10-19 years in Cameroon, 2021, receiving ART for at least 6 months. The majority of participants (89.7%) were infected perinatally, and they were followed up in an urban hospital setting. Participants were categorized based on their viral load: those with low-level viraemia (VL 200-999 copies/mL) and those with virological failure (VL $\geq$ 1000 copies/mL).                                                                                                | ART regimens included TDF-3TC-EFV, ABC-3TC-EFV, TDF-3TC-DTG, TDF-3TC-LPV/r, ABC-3TC-LPV/r, and TDF-3TC-ATV/r.                                                                                                                                                                                  | Comparison of HIV drug resistance between adolescents with low-level viraemia and those with confirmed VF.                                                                                                                                                                                                                      | Presence of HIV drug resistance mutations, resistance to specific drug classes, risk associated with functional monotherapy.                                               |
| Khamadi SA, 2023         | HIV-infected children and adolescents aged 1-19 years, living in the Southern Highland zone of Tanzania. The study includes participants on ART for more than 6 months between 2019 and 2021. The median age is 12 years, with 54% female. The study also notes participants receiving ART through PMTCT programs and those experiencing VF.                                                                                                                                                            | The intervention includes 290 (41.0%) participants were on an ART regimen with an abacavir ABC/3TC backbone, 54 (7.6%) were on an AZT/3TC backbone, and 363 (51.3%) were on a TDF/3TC backbone regimen, including 339 (93.4%) who were on TDF/3TC/DTG.                                         | Different ART regimens (NNRTI-based, PI-based, and INSTI-based) to evaluate their effectiveness in achieving viral suppression and in managing drug resistance mutations.                                                                                                                                                       | Prevalence of viral suppression (VS) (<1000 copies/mL) and the occurrence of HIV drug resistance mutations (HIVDRMs).                                                      |
| C. Charpentier, 2012     | HIV-1-infected children from the Central African Republic, studied between April and June 2009. The study involved 242 children, with a median age of 8 years (range: 4 months to 18 years). Among these children, 165 were receiving ART, including first-line, second-line, and third-line regimens. Most children were infected through PMTCT. The study assessed virological failure and resistance profiles after a median of 18 months on first-line ART and 30 months on second-/third-line ART. | Children were receiving ART regimens based on WHO recommendations. The majority of children were on a first-line regimen, primarily consisting of a combination of d4T, 3TC, and NVP. A smaller group of children was on second-line or third-line regimens, including PIs such as LPV or IDV. | Virological failure and the prevalence of drug resistance mutations between children on first-line ART regimens and those on second-/third-line regimens. The study also assessed the difference in resistance patterns to NRTIs and NNRTIs between these groups.                                                               | Detection of HIV-1 RNA, virological failure, presence of drug-resistance mutations, major resistance mutations (excluding M184V), resistance mutations to NRTIs or NNRTIs. |
| Mboumba Bouassa RS, 2019 | HIV-1-infected children aged 5-19 years (median age 11 years), in Central African Republic (Bangui). Most were born to HIV-infected mothers who failed PMTCT. All participants were in virological failure, defined as viral load > 1000 copies/mL, and were cART-experienced but INSTI-naïve (no prior exposure to integrase strand transfer inhibitors).                                                                                                                                              | Fourteen of them received a combination of ZDV + d4T + NVP, two children received ZDV + 3TC + EFV and one child received a PI-based combination composed of d4T + 3TC + lopinavir boosted by LPV/r.                                                                                            | The study compared the prevalence of DRMs in the integrase gene among children failing first- and second-line WHO-recommended ART regimens, evaluating the susceptibility of their HIV-1 strains to INSTIs. This was contrasted against the effectiveness of other antiretrovirals in use, particularly NRTIs, NNRTIs, and PIs. | Susceptibility to INSTIs, presence of major resistance mutations (E138K and E138T), potential effectiveness of INSTIs (particularly dolutegravir) in optimized regimens.   |

|                   |                                                                                                                                                                                                                                                                                                                                                                                                                                                                                                                                                                                                                                                                   |                                                                                                                                                                                                                                                                                                                                                                                                                                             |                                                                                                                                                                                                                                                                                             |                                                                                                                                                                                                                                                                                                                                                                                                                                                 |
|-------------------|-------------------------------------------------------------------------------------------------------------------------------------------------------------------------------------------------------------------------------------------------------------------------------------------------------------------------------------------------------------------------------------------------------------------------------------------------------------------------------------------------------------------------------------------------------------------------------------------------------------------------------------------------------------------|---------------------------------------------------------------------------------------------------------------------------------------------------------------------------------------------------------------------------------------------------------------------------------------------------------------------------------------------------------------------------------------------------------------------------------------------|---------------------------------------------------------------------------------------------------------------------------------------------------------------------------------------------------------------------------------------------------------------------------------------------|-------------------------------------------------------------------------------------------------------------------------------------------------------------------------------------------------------------------------------------------------------------------------------------------------------------------------------------------------------------------------------------------------------------------------------------------------|
| Pang X, 2024      | The study involved 491 HIV-1-infected children and adolescents from Guangxi, China, under the age of 18. These individuals were undergoing prolonged ART and experiencing virologic failure. The median treatment duration was 7.4 years, and the study population predominantly contracted HIV through mother-to-child transmission (86.62%). Most participants were on ART regimens containing NNRTIs and NRTIs, with some having pretreatment CD4+ T cell counts below 200 cells/mm <sup>3</sup> and high viral loads (>1000 copies/mL).                                                                                                                       | The intervention examined was the continued administration of various ART regimens, primarily involving NNRTIs (Nevirapine) and NRTIs (Lamivudine, Zidovudine). The study focused on understanding the prevalence and patterns of DRMs among this population.                                                                                                                                                                               | The study compared the emergence of drug resistance mutations between different ART regimens and their effectiveness. It also examined the differences in DRMs based on various factors like gender, HIV subtype (CRF01_AE, CRF08_BC), pretreatment CD4 counts, and viral load levels.      | Prevalence of HIV drug resistance mutations (DRMs), resistance to NNRTIs and NRTIs, key mutations (M184V/I, K103N), associated risk factors (male sex, CRF01_AE subtype, low pretreatment CD4+ T cells, high viral load).                                                                                                                                                                                                                       |
| Sivay MV, 2024    | This study was conducted in four Siberian regions of Russia (Altai, Krasnoyarsk, Novosibirsk, Omsk) from 2019 to 2021. It involved 815 HIV-infected individuals, including 96 children (0-14 years old) and 719 adults (≥15 years old). The median age of the patients was 37 years. The study population included individuals who had been diagnosed with HIV for a median of 5 years. Some of the participants were infected through perinatal transmission (11.9%) while others were through heterosexual contact or persons who inject drugs. All children in the study received ART to PMTCT.                                                                | The intervention involved ART regimens. For children, INSTI-based therapy was the most common (51.1%), followed by PI-based (24.9%) and NNRTI-based (20.5%). For adults, NNRTI-based ART was the most common (51.4%), followed by INSTI-based (18.1%) and PI-based (17.5%). ART adherence was assessed using self-reported data. The most common ART regimens included ABC + 3TC + RAL for children and TDF + 3TC + NVP/EFV/ETR for adults. | The study compared DRMs between different ART regimens and among patients with varying epidemiological characteristics. Factors such as viral load levels, CD4 cell counts, and region of residence were analyzed to determine their association with the presence of DRMs.                 | Prevalence of HIV drug resistance mutations (DRMs), resistance to NNRTIs and NRTIs, key mutations (M184V/I, K103N), associated factors (male sex, CRF01_AE subtype, low pretreatment CD4+ T cells, high viral load).                                                                                                                                                                                                                            |
| Tambuyzer L, 2016 | The study involved HIV-1-infected children and adolescents aged 6 to <18 years who were treatment-experienced. The participants were from multiple countries, including Thailand, Argentina, the USA, and South Africa in 2008. A total of 101 patients (41 children and 60 adolescents) were enrolled, with a median baseline viral load of 3.6 log <sub>10</sub> copies/ml for children and 4.0 log <sub>10</sub> copies/ml for adolescents. Patients had previously used at least two ARVs, including NRTIs, NNRTIs, and PIs. The study assessed those currently failing virologically (confirmed plasma viral load >500 copies/ml) at the start of the study. | The intervention included the administration of etravirine (5.2 mg/kg twice daily) along with an optimized background regimen consisting of a boosted PI, NRTIs, and optional enfuvirtide and/or raltegravir. Etravirine was chosen based on its resistance profile and previous usage of NNRTIs in the population.                                                                                                                         | The study compared the presence and emergence of resistance-associated mutations between VFs and responders, focusing on mutations related to etravirine and other NNRTIs. Both population sequencing and deep sequencing were utilized to detect minority variants and emerging mutations. | The study found that 40.6% of the patients experienced virological failure by week 48. The emergence of resistance to etravirine was observed, with specific RAMs, such as Y181C, L100I, and E138A, being detected. The study concluded that etravirine resistance patterns in children and adolescents were similar to those observed in adults, and the presence of minority variants was not consistently associated with treatment failure. |
| Lange CM, 2015    | HIV-1-infected children in South Africa, involved in the CHER trial. The study includes children who were infected despite receiving nevirapine prophylaxis for the PMTCT. The children were aged less than 12 weeks at ART initiation. Baseline drug resistance was analyzed, and the children had virological failure while on PI-based ART.                                                                                                                                                                                                                                                                                                                    | Early ART with a regimen including AZT, 3TC, and LPV/r. ART was initiated within the first 12 weeks of life, and the treatment continued for various periods. Some children also received ritonavir to achieve VL with LPV due to tuberculosis treatment.                                                                                                                                                                                   | Presence of DRMs detected by single genome sequencing and bulk sequencing. The focus was on identifying multiclass drug resistance, particularly in children with early virological failure after PI-based ART.                                                                             | Virological failure rate by week 48, emergence of resistance to etravirine, specific resistance-associated mutations (RAMs) (Y181C, L100I, E138A), comparison of etravirine resistance patterns in children/adolescents and adults, association of minority variants with treatment failure.                                                                                                                                                    |



|                     |                                                                                                                                                                                                                                                                                                                                                                                                                                                                                                                                                                                                                                                                                                                                      |                                                                                                                                                                                                                                                                                                                                                                                                                                                                                                  |                                                                                                                                                                                                                                                                                                                                         |                                                                                                                                                                                                                                                                                                                    |
|---------------------|--------------------------------------------------------------------------------------------------------------------------------------------------------------------------------------------------------------------------------------------------------------------------------------------------------------------------------------------------------------------------------------------------------------------------------------------------------------------------------------------------------------------------------------------------------------------------------------------------------------------------------------------------------------------------------------------------------------------------------------|--------------------------------------------------------------------------------------------------------------------------------------------------------------------------------------------------------------------------------------------------------------------------------------------------------------------------------------------------------------------------------------------------------------------------------------------------------------------------------------------------|-----------------------------------------------------------------------------------------------------------------------------------------------------------------------------------------------------------------------------------------------------------------------------------------------------------------------------------------|--------------------------------------------------------------------------------------------------------------------------------------------------------------------------------------------------------------------------------------------------------------------------------------------------------------------|
| B. P. Gopalan, 2019 | The study involved HIV-1-infected children aged $\leq 16$ years in Bangalore, India, between January 2012 and March 2016. All children were vertically infected and initiated on NNRTI-based ART. The study focused on those who had been on continuous ART for $\geq 2$ years and had available pre and post ART samples. The population included both virological nonresponders (children with VL $\geq 200$ copies/mL at two consecutive time points within 2 years of ART initiation) and responders (children who maintained VL $< 200$ copies/mL for two or more years after six months of ART initiation). The analysis also looked at the presence of PMTCT exposure, but specific details about PMTCT were not highlighted. | The intervention involved initiating NNRTI-based ART regimens. Specifically, the children received either Nevirapine or Efavirenz combined with NRTIs such as AZT+3TC, d4T+3TC, or TDF+3TC. The study also examined the presence of DRMs in cell-associated DNA and cell-free RNA at different time points (baseline, month six of ART, and at virological failure) using next-generation sequencing and Sanger sequencing.                                                                      | Virological nonresponders and responders. The study compared the presence and frequency of DRMs in cell-associated DNA and cell-free RNA between these groups. It also compared the predictive value of NGS analysis of cell-associated DNA at six months of ART with Sanger sequencing of cell-free RNA for early virological failure. | Prevalence of treatment-relevant DRMs.                                                                                                                                                                                                                                                                             |
| A. J. Szubert, 2017 | HIV-infected children from Uganda and Zimbabwe, aged 3 months to 17 years, recruited between March 2007 and November 2008. The study involved 1,206 children with a median age of 6 years at ART initiation. The majority had advanced HIV disease with a median CD4% of 12%. The study also included children born to mothers who may have received PMTCT interventions, though specific details about PMTCT exposure were not extensively discussed. Children were followed for a median of 4 years.                                                                                                                                                                                                                               | The intervention included ART regimens initiated based on WHO 2006 guidelines. Children were randomized to receive either 2NRTIs plus an NNRTI (mainly lamivudine and abacavir plus nevirapine or efavirenz) or a 3NRTI regimen as long-term ART. Viral load was not monitored in real-time, and CD4 counts were monitored in some children. The study focused on evaluating virological outcomes, drug resistance, and long-term virological suppression without regular viral load monitoring. | Comparison was between children monitored with CD4 counts versus those without CD4 counts, and between the different ART regimens. The study also compared the virological suppression rates, drug resistance patterns, and the development of resistance mutations over time among the different monitoring strategies.                | Long-term virological response, accumulation of resistance mutations, effectiveness of ART regimens without real-time viral load monitoring, viral load suppression below 1,000 copies/mL after 4 years, resistance to second-line drugs, importance of confirming virological failure before switching therapies. |

Abbreviations, DRMs = drug resistance mutations; ART antiretroviral therapy; cART = combination antiretroviral therapy; NRTIs = nucleoside reverse transcriptase inhibitors; NNRTIs = non-nucleoside reverse transcriptase inhibitors; NVP = nevirapine; PI = protease inhibitor; LPV/r = lopinavir/ritonavir; INSTIs = integrase strand transfer inhibitors; d4T = stavudine; 3TC = lamivudine ; DBS = dried blood spots; VF = virological failure; PDR = pretreatment HIV drug resistance; VL = viral load; PMTCT = mother-to-child transmission; RAMs = resistance-associated mutations; ZDV = Zidovudine; NFV = nelfinavir; RTIs = reverse transcriptase inhibitors; TAMs = thymidine analogue mutations; HAART = Highly Active Antiretroviral Therapy.

**Table S4A: Quality assessment of included DR studies for treatment-naive children prevalence analysis**

- Q1. Was the study's target population a close representation of the national population in relation to relevant variables?  
 Q2. Was some form of random selection used to select the sample, OR was a census undertaken?  
 Q3. Was the likelihood of nonresponse bias minimal?  
 Q4. Were data collected directly from the subjects (as opposed to a proxy)?  
 Q5. Was an acceptable case definition used in the study?  
 Q6. Was the study instrument that measured the parameter of interest shown to have validity and reliability?  
 Q7. Was the same mode of data collection used for all subjects?  
 Q8. Was the length of the shortest prevalence period for the parameter of interest appropriate?  
 Q9. Were the numerator(s) and denominator(s) for the parameter of interest appropriate

TOTAL SCORE: Poor (0-3), Fair (4-6), Good (7-9).

Quality assessment of naive children studies

| Study                         | Overall Quality Rating | Q1 | Q2 | Q3 | Q4 | Q5 | Q6 | Q7 | Q8 | Q9 |
|-------------------------------|------------------------|----|----|----|----|----|----|----|----|----|
| J. Lidstrom, 2010             | Fair                   | N  | N  | Y  | Y  | Y  | Y  | N  | Y  | Y  |
| W. I. Towler, 2010            | Good                   | N  | N  | Y  | Y  | Y  | Y  | Y  | Y  | Y  |
| Jessica D. Church, 2008       | Good                   | NR | Y  | Y  | Y  | Y  | Y  | N  | Y  | Y  |
| Jessica Fogel, 2011           | Fair                   | NR | N  | Y  | Y  | Y  | Y  | N  | Y  | Y  |
| Russell B. Van Dyke, 2016     | Good                   | Y  | Y  | Y  | Y  | Y  | Y  | Y  | Y  | Y  |
| SwaraliN Kurle, 2007          | Fair                   | N  | N  | Y  | Y  | Y  | Y  | N  | Y  | N  |
| Moira Vignoles, 2009          | Fair                   | N  | N  | Y  | Y  | Y  | Y  | Y  | Y  | N  |
| Diana M Gibb, 2003            | Fair                   | NR | N  | N  | Y  | Y  | NR | Y  | Y  | Y  |
| Julie A E Nelson, 2015        | Fair                   | NR | N  | Y  | Y  | Y  | Y  | N  | Y  | Y  |
| Frantz Jean Louis, 2019       | Good                   | N  | Y  | Y  | Y  | Y  | Y  | Y  | Y  | Y  |
| Ragna S Boerma, 2016          | Fair                   | N  | N  | Y  | Y  | Y  | Y  | Y  | Y  | N  |
| Sydney J. TOWNSEND, 2020      | Good                   | N  | Y  | Y  | Y  | Y  | Y  | Y  | Y  | Y  |
| Seth C. Inzaule, 2018         | Good                   | N  | Y  | Y  | Y  | Y  | Y  | Y  | Y  | Y  |
| Claudia S. Crowell, 2017      | Fair                   | N  | Y  | N  | Y  | Y  | Y  | N  | Y  | Y  |
| Mounerou Salou, 2016          | Good                   | Y  | Y  | N  | Y  | Y  | Y  | Y  | Y  | Y  |
| Cissy Kityo, 2016             | Good                   | N  | Y  | Y  | Y  | Y  | Y  | Y  | Y  | Y  |
| Dorothy E. Dow, 2017          | Fair                   | N  | N  | Y  | Y  | Y  | Y  | Y  | Y  | N  |
| Gillian M. Hunt, 2011         | Good                   | N  | Y  | Y  | Y  | Y  | Y  | Y  | Y  | Y  |
| Clement Zeh, 2011             | Fair                   | N  | N  | Y  | Y  | Y  | Y  | Y  | Y  | N  |
| Nicholas I. Nii-Trebi, 2013   | Good                   | N  | Y  | Y  | Y  | Y  | Y  | Y  | Y  | Y  |
| Jennifer Neubert, 2016        | Good                   | N  | Y  | Y  | Y  | Y  | Y  | N  | Y  | Y  |
| Barbara S. Taylor, 2011       | Fair                   | N  | Y  | N  | Y  | Y  | Y  | Y  | Y  | N  |
| Djeneba B. Fofana, 2023       | Good                   | N  | Y  | Y  | Y  | Y  | Y  | Y  | Y  | Y  |
| Gillian M. Hunt, 2019         | Good                   | Y  | Y  | Y  | Y  | Y  | Y  | Y  | Y  | Y  |
| Monica M Parker, 2003         | Fair                   | N  | N  | Y  | Y  | Y  | Y  | N  | Y  | Y  |
| Marine Karchava, 2006         | Fair                   | N  | N  | Y  | Y  | Y  | N  | Y  | Y  | N  |
| Pierre Frange, 2018           | Good                   | N  | N  | Y  | Y  | Y  | Y  | Y  | Y  | Y  |
| Nicole Ngo-Giang-Huong, 2016  | Fair                   | NR | N  | Y  | Y  | Y  | Y  | Y  | Y  | N  |
| Birkneh Tilahun Tadesse, 2019 | Good                   | N  | N  | Y  | Y  | Y  | Y  | Y  | Y  | Y  |

|                                         |                        |    |    |    |    |    |    |    |    |    |
|-----------------------------------------|------------------------|----|----|----|----|----|----|----|----|----|
| Michael R Jordan, 2022                  | Fair                   | N  | N  | Y  | Y  | Y  | Y  | N  | Y  | Y  |
| Sandra Soeria-Atmadja, 2020             | Fair                   | N  | N  | Y  | Y  | Y  | Y  | Y  | Y  | N  |
| Paula C. Aulicino, 2019                 | Good                   | N  | Y  | Y  | Y  | Y  | Y  | Y  | Y  | Y  |
| Syed Hani Abidi, 2021                   | Good                   | N  | Y  | Y  | Y  | Y  | Y  | Y  | Y  | Y  |
| Andrea Kovacs, 2005                     | Fair                   | N  | N  | Y  | Y  | Y  | N  | Y  | Y  | Y  |
| Study                                   | Overall Quality Rating | Q1 | Q2 | Q3 | Q4 | Q5 | Q6 | Q7 | Q8 | Q9 |
| Constance Delaugerre, 2009              | Fair                   | Y  | N  | Y  | Y  | Y  | Y  | N  | Y  | N  |
| George Mondinde Ikomey, 2017            | Good                   | N  | N  | Y  | Y  | Y  | Y  | Y  | Y  | Y  |
| Solange Dourado de Andrade, 2017        | Fair                   | N  | N  | Y  | Y  | Y  | Y  | Y  | Y  | NR |
| Louise Kuhn, 2015                       | Good                   | N  | Y  | Y  | Y  | Y  | Y  | Y  | Y  | N  |
| Joseph Fokam, 2011                      | Fair                   | N  | N  | Y  | Y  | Y  | Y  | Y  | Y  | N  |
| J Han, 2009                             | Good                   | N  | Y  | Y  | Y  | Y  | Y  | N  | Y  | Y  |
| Susan H. Eshleman, 2001                 | Fair                   | NR | N  | Y  | Y  | Y  | Y  | N  | Y  | N  |
| Neil A. Martinson, 2007                 | Good                   | N  | Y  | Y  | Y  | Y  | Y  | Y  | Y  | N  |
| P. Vaz, 2012                            | Fair                   | N  | N  | Y  | Y  | Y  | Y  | Y  | Y  | N  |
| Fiyinfoluwa I. Olusola, 2021            | Good                   | N  | Y  | N  | Y  | Y  | Y  | Y  | Y  | Y  |
| Paula Morena de Souza Guimaraes, 2015   | Good                   | N  | Y  | Y  | Y  | Y  | Y  | Y  | Y  | Y  |
| Bernard Masquelier, 2001                | Fair                   | N  | N  | Y  | Y  | Y  | N  | Y  | Y  | N  |
| Michael R Jordan, 2017                  | Good                   | N  | Y  | N  | Y  | Y  | Y  | Y  | Y  | Y  |
| Nava Yeganeh, 2018                      | Fair                   | N  | N  | Y  | Y  | Y  | Y  | N  | Y  | Y  |
| Ujjwal Neogi, 2012                      | Fair                   | N  | N  | Y  | Y  | Y  | Y  | Y  | N  | Y  |
| Suwellen Sardinha Dias de Azevedo, 2022 | Good                   | N  | Y  | N  | Y  | Y  | Y  | Y  | Y  | Y  |
| Tanya Rogo, 2015                        | Good                   | N  | Y  | N  | Y  | Y  | Y  | Y  | Y  | Y  |
| Amphan Chalermchockcharoenkit, 2009     | Fair                   | N  | N  | N  | Y  | Y  | Y  | Y  | Y  | Y  |
| Thuy Thi Bich Phung, 2015               | Fair                   | N  | N  | N  | Y  | Y  | Y  | Y  | Y  | Y  |
| Francisco Antunes, 2015                 | Fair                   | N  | Y  | N  | Y  | Y  | Y  | N  | Y  | Y  |
| Flávia J. Almeida, 2009                 | Good                   | N  | Y  | Y  | Y  | Y  | Y  | Y  | Y  | Y  |
| Jessica M. Fogel, 2013                  | Good                   | N  | N  | Y  | Y  | Y  | Y  | Y  | Y  | Y  |
| Marie-Laure Chaix, 2007                 | Fair                   | N  | Y  | N  | Y  | Y  | N  | N  | Y  | Y  |
| Maryam Jarchi, 2019                     | Good                   | N  | Y  | Y  | Y  | Y  | Y  | Y  | Y  | Y  |
| L. Tambuyzer, 2016                      | Fair                   | N  | N  | N  | Y  | Y  | Y  | N  | Y  | N  |
| D. A. Lehman, 2012                      | Fair                   | N  | NR | N  | Y  | Y  | N  | Y  | Y  | Y  |
| R. G. Fisher, 2015                      | Fair                   | N  | NR | Y  | Y  | Y  | N  | Y  | N  | Y  |
| J. Fokam, 2018                          | Fair                   | N  | N  | Y  | Y  | N  | N  | N  | Y  | Y  |
| C. M. Lange, 2015                       | Good                   | N  | Y  | Y  | Y  | Y  | Y  | Y  | N  | Y  |
| D. Persaud, 2011                        | Fair                   | Y  | Y  | N  | Y  | Y  | N  | Y  | Y  | N  |

**Table S4B: Quality assessment of included DR studies for treatment-experienced children prevalence analysis**

| Study                                  | Overall Quality Rating | Q1 | Q2 | Q3 | Q4 | Q5 | Q6 | Q7 | Q8 | Q9 |
|----------------------------------------|------------------------|----|----|----|----|----|----|----|----|----|
| Hannah Green, 2006                     | Good                   | Y  | Y  | Y  | Y  | Y  | N  | Y  | Y  | Y  |
| T. Sonia Boender, 2016                 | Good                   | N  | Y  | Y  | Y  | Y  | Y  | Y  | Y  | N  |
| W. I. Towler, 2010                     | Fair                   | N  | N  | Y  | Y  | Y  | Y  | Y  | Y  | N  |
| Doreen Kamori, 2023                    | Good                   | Y  | Y  | Y  | Y  | Y  | Y  | N  | Y  | Y  |
| Mia Coetzer, 2013                      | Fair                   | N  | N  | Y  | Y  | Y  | Y  | N  | Y  | N  |
| Theresa M Rossouw, 2015                | Good                   | N  | Y  | Y  | Y  | Y  | Y  | Y  | Y  | Y  |
| Marie-Laure Chaix, 2005                | Fair                   | N  | N  | N  | Y  | Y  | Y  | Y  | Y  | Y  |
| Elizabeth S Machado, 2004              | Fair                   | N  | N  | Y  | Y  | Y  | Y  | N  | Y  | Y  |
| Ana Rodríguez-Galet, 2023              | Good                   | N  | N  | Y  | Y  | Y  | Y  | Y  | Y  | Y  |
| M. Rubio-Garrido, 2021                 | Fair                   | N  | Y  | N  | Y  | Y  | Y  | N  | Y  | Y  |
| Birkneh Tilahun Tadesse, 2018          | Good                   | Y  | Y  | Y  | Y  | Y  | Y  | Y  | Y  | Y  |
| Christian Diamant Mossoro-Kpinde, 2017 | Fair                   | N  | Y  | N  | Y  | Y  | Y  | Y  | Y  | N  |
| Khady Kebe, 2013                       | Good                   | N  | Y  | N  | Y  | Y  | Y  | Y  | Y  | Y  |
| Claudia S. Crowell, 2017               | Good                   | N  | Y  | Y  | Y  | Y  | Y  | Y  | Y  | Y  |
| Cheryl A. Stoddart, 2014               | Fair                   | N  | N  | Y  | Y  | Y  | Y  | Y  | Y  | N  |
| J-P Aboulker, 2004                     | Fair                   | Y  | N  | Y  | Y  | Y  | N  | Y  | Y  | N  |
| T Puthanakit, 2010                     | Good                   | Y  | Y  | N  | Y  | Y  | N  | Y  | Y  | Y  |
| Winstone Nyandiko, 2022                | Fair                   | N  | Y  | N  | Y  | Y  | Y  | Y  | Y  | N  |
| Barbara S. Taylor, 2011                | Fair                   | N  | N  | N  | Y  | Y  | Y  | Y  | Y  | Y  |
| Djeneba B. Fofana, 2023                | Good                   | NR | N  | Y  | Y  | Y  | Y  | Y  | Y  | Y  |
| German A. Contreras, 2013              | Good                   | N  | Y  | Y  | Y  | Y  | Y  | Y  | Y  | Y  |
| Constance Delaugerre, 2007             | Fair                   | N  | Y  | Y  | Y  | Y  | N  | N  | Y  | N  |
| Allison L. Agwu, 2014                  | Good                   | Y  | N  | Y  | Y  | Y  | Y  | Y  | Y  | Y  |
| Seth C. Inzaule, 2016                  | Fair                   | NR | N  | Y  | Y  | Y  | Y  | Y  | Y  | N  |
| Cissy Kityo, 2017                      | Good                   | N  | Y  | Y  | Y  | Y  | Y  | Y  | Y  | Y  |
| Sandra Soeria-Atmadja, 2020            | Good                   | N  | N  | Y  | Y  | Y  | Y  | Y  | Y  | Y  |
| Podjane Jittamala, 2009                | Fair                   | N  | Y  | N  | Y  | Y  | N  | Y  | Y  | N  |
| Syed Hani Abidi, 2021                  | Good                   | N  | Y  | Y  | Y  | Y  | Y  | Y  | Y  | Y  |
| Bhavna H. Chohan, 2015                 | Fair                   | N  | N  | Y  | Y  | Y  | N  | Y  | Y  | Y  |
| Anita Shet, 2013                       | Good                   | N  | Y  | Y  | Y  | Y  | N  | Y  | Y  | Y  |
| Theodore D, 2011                       | Fair                   | N  | N  | N  | Y  | Y  | Y  | N  | Y  | Y  |
| Liting Yan, 2022                       | Good                   | N  | Y  | Y  | Y  | Y  | Y  | Y  | Y  | Y  |
| Yan Zhao, 2011                         | Fair                   | N  | N  | Y  | Y  | Y  | Y  | N  | Y  | Y  |
| Clara Bratholm, 2010                   | Fair                   | N  | N  | Y  | Y  | Y  | Y  | Y  | Y  | N  |
| Ravindra K. Gupta, 2010                | Fair                   | N  | Y  | N  | Y  | Y  | Y  | N  | Y  | Y  |
| Jean-Christophe Beghin, 2020           | Good                   | N  | Y  | N  | Y  | Y  | Y  | Y  | Y  | Y  |
| Judit Ventosa-Cubillo, 2023            | Fair                   | N  | N  | Y  | Y  | Y  | Y  | Y  | Y  | N  |
| Lukas Muri, 2017                       | Good                   | N  | Y  | N  | Y  | Y  | Y  | Y  | Y  | Y  |
| Paula Vaz, 2018                        | Good                   | Y  | Y  | N  | Y  | Y  | Y  | Y  | Y  | Y  |
| A.T. Makadzange, 2015                  | Fair                   | N  | Y  | N  | Y  | Y  | Y  | Y  | Y  | N  |
| George A. Yendewa, 2021                | Good                   | N  | Y  | N  | Y  | Y  | Y  | Y  | Y  | Y  |
| Josephine Brice, 2020                  | Good                   | N  | Y  | Y  | Y  | Y  | Y  | Y  | Y  | Y  |
| Vaz, Paula, 2009                       | Fair                   | N  | N  | N  | Y  | Y  | N  | Y  | Y  | Y  |
| M. Sylla, 2019                         | Fair                   | N  | Y  | N  | Y  | Y  | Y  | N  | Y  | Y  |
| P. Vaz, 2012                           | Good                   | N  | Y  | Y  | Y  | Y  | Y  | Y  | Y  | Y  |

|                                   |                        |    |    |    |    |    |    |    |    |    |
|-----------------------------------|------------------------|----|----|----|----|----|----|----|----|----|
| Patricia A. Brindeiro, 2002       | Fair                   | N  | Y  | Y  | Y  | Y  | Y  | N  | Y  | N  |
| Study                             | Overall Quality Rating | Q1 | Q2 | Q3 | Q4 | Q5 | Q6 | Q7 | Q8 | Q9 |
| Christiane Adjé-Touré, 2008       | Fair                   | NR | N  | N  | Y  | Y  | NR | Y  | Y  | Y  |
| Paul Alain Tagnouokam-Ngoup, 2021 | Good                   | N  | Y  | N  | Y  | Y  | Y  | Y  | Y  | Y  |
| Clarisse Amani-Bosse, 2017        | Good                   | N  | Y  | N  | Y  | Y  | Y  | Y  | Y  | Y  |
| Laurence Ahoua, 2011              | Fair                   | N  | Y  | N  | Y  | Y  | N  | Y  | Y  | Y  |
| Philippe R. Mutwa, 2014           | Fair                   | N  | N  | N  | Y  | Y  | Y  | Y  | Y  | Y  |
| Tanya Rogo, 2015                  | Good                   | N  | Y  | N  | Y  | Y  | Y  | Y  | Y  | Y  |
| Miguel de Mulder, 2011            | Fair                   | Y  | Y  | N  | Y  | Y  | Y  | N  | Y  | N  |
| Joseph E.Fitzgibbon, 2004         | Fair                   | N  | N  | Y  | Y  | Y  | N  | Y  | Y  | N  |
| Compagno Francesca, 2019          | Fair                   | NR | N  | Y  | Y  | Y  | Y  | N  | Y  | Y  |
| Lisa L. Ross, 2015                | Good                   | Y  | Y  | N  | Y  | Y  | N  | Y  | Y  | Y  |
| R. Lwembe, 2007                   | Fair                   | NR | N  | Y  | Y  | Y  | Y  | Y  | Y  | N  |
| S. H. Al Hajjar, 2012             | Good                   | N  | Y  | Y  | Y  | Y  | NR | Y  | Y  | Y  |
| Z. Makatini, 2019                 | Fair                   | N  | Y  | Y  | Y  | Y  | Y  | NR | Y  | N  |
| M. Camara-Cisse, 2021             | Good                   | N  | Y  | Y  | Y  | Y  | N  | Y  | Y  | Y  |
| A. T. Dumans, 2009                | Fair                   | NR | N  | Y  | Y  | Y  | N  | Y  | Y  | N  |
| J. Fokam, 2011                    | Good                   | N  | N  | Y  | Y  | Y  | Y  | Y  | Y  | Y  |
| T. N. Green, 2012                 | Fair                   | N  | N  | Y  | Y  | Y  | Y  | Y  | Y  | N  |
| S. Pillay, 2014                   | Fair                   | N  | N  | Y  | Y  | Y  | Y  | N  | Y  | Y  |
| G. M. Hunt, 2023                  | Good                   | Y  | Y  | Y  | Y  | Y  | Y  | Y  | Y  | Y  |
| D. B. Fofana, 2018                | Good                   | N  | Y  | Y  | Y  | Y  | N  | Y  | Y  | Y  |
| J. Servais, 2002                  | Fair                   | N  | N  | Y  | Y  | Y  | NR | Y  | Y  | N  |
| A. P. Ramkissoon, 2015            | Good                   | N  | Y  | N  | Y  | Y  | Y  | Y  | Y  | Y  |
| Shanmugam Saravanan, 2017         | Fair                   | NR | N  | Y  | Y  | Y  | Y  | Y  | Y  | N  |
| Bismara BA, 2012                  | Fair                   | N  | N  | Y  | Y  | Y  | N  | Y  | Y  | Y  |
| B. P. Gopalan, 2019               | Good                   | N  | Y  | Y  | Y  | Y  | Y  | Y  | Y  | N  |
| A. J. Szubert, 2017               | Good                   | Y  | N  | Y  | Y  | Y  | Y  | Y  | N  | Y  |
| C. Charpentier, 2012              | Fair                   | N  | Y  | N  | Y  | Y  | N  | Y  | Y  | N  |
| Abuogi L, 2023                    | Good                   | N  | Y  | Y  | Y  | Y  | Y  | Y  | N  | Y  |
| Djiyou ABD, 2023                  | Fair                   | N  | Y  | N  | Y  | Y  | Y  | Y  | N  | Y  |
| Khamadi SA, 2023                  | Good                   | N  | Y  | N  | Y  | Y  | Y  | Y  | Y  | Y  |
| Pang X, 2024                      | Fair                   | N  | N  | Y  | Y  | Y  | N  | Y  | Y  | Y  |
| Sivay MV, 2024                    | Good                   | Y  | N  | Y  | Y  | Y  | Y  | Y  | N  | Y  |
| Thu HHK, 2024                     | Good                   | Y  | N  | N  | Y  | Y  | Y  | Y  | Y  | N  |
| Mboumba Bouassa RS, 2019          | Fair                   | N  | Y  | N  | Y  | Y  | Y  | Y  | Y  | N  |

**Table S5A: Pooled prevalence of drug resistance among treatment-naive children after 2015**

|                            | Number of datasets | Number of HIV-infected individuals | Number of Individuals with DR | Prevalence of DR (95% Confidence Interval) | Heterogeneity      |         | p value for subgroup difference |
|----------------------------|--------------------|------------------------------------|-------------------------------|--------------------------------------------|--------------------|---------|---------------------------------|
|                            |                    |                                    |                               |                                            | I <sup>2</sup> (%) | p value |                                 |
| Overall                    | 11                 | 904                                | 361                           | 25.40 (11.80-41.79)                        | 94                 | <0.01   |                                 |
| Region*                    |                    |                                    |                               |                                            |                    |         | <0.01                           |
| Asia                       | 3                  | 170                                | 83                            | 36.20 (11.08-65.93)                        | 92                 | <0.01   |                                 |
| Eastern Africa             | 2                  | 147                                | 26                            | 17.58 (11.75-24.25)                        | 0                  | 0.37    |                                 |
| Southern Africa            | 1                  | 49                                 | 33                            | 67.35 (51.46-80.05)                        | -                  | -       |                                 |
| Western and Central Africa | 5                  | 538                                | 219                           | 15.67 (0.79-40.82)                         | 96                 | <0.01   |                                 |
| World Bank Income Level    |                    |                                    |                               |                                            |                    |         | 0.07                            |
| Low income                 | 2                  | 147                                | 26                            | 17.58 (11.75-24.25)                        | 0                  | 0.37    |                                 |
| Lower middle income        | 8                  | 713                                | 335                           | 33.86 (17.20-52.70)                        | 89                 | <0.01   |                                 |
| Age group (years)          |                    |                                    |                               |                                            |                    |         | <0.01                           |
| < 2                        | 3                  | 584                                | 304                           | 58.18 (45.81-70.00)                        | 84                 | <0.01   |                                 |
| ≥2                         | 11                 | 320                                | 57                            | 13.85 (5.17-25.29)                         | 81                 | <0.01   |                                 |
| PMTCT experience           |                    |                                    |                               |                                            |                    |         | <0.01                           |
| Yes                        | 6                  | 686                                | 330                           | 38.10 (17.37-61.27)                        | 91                 | <0.01   |                                 |
| no                         | 5                  | 218                                | 31                            | 11.37 (2.47-24.44)                         | 81                 | <0.01   |                                 |

PMTCT= the prevention of mother-to-child transmission

\*median (range).

Several datasets are generated from the same study.

**Table S5B: Pooled prevalence of drug resistance among treatment-experienced children after 2015**

|                               | Number of datasets | Number of HIV-infected individuals | Number of Individuals with DR | Prevalence of DR (95% Confidence Interval) | Heterogeneity  |         | p value for subgroup difference |
|-------------------------------|--------------------|------------------------------------|-------------------------------|--------------------------------------------|----------------|---------|---------------------------------|
|                               |                    |                                    |                               |                                            | I <sup>2</sup> | p value |                                 |
| Overall                       | 20                 | 2644                               | 1808                          | 67.93 (55.59-79.15)                        | 97%            | <0.01   |                                 |
| Region                        |                    |                                    |                               |                                            |                |         | <0.01                           |
| South America                 | 1                  | 62                                 | 36                            | 58.06 (44.85-70.49)                        | -              | -       |                                 |
| North America                 | 1                  | 41                                 | 39                            | 95.12 (83.47-99.40)                        | -              | -       |                                 |
| Europe                        | 1                  | 96                                 | 71                            | 73.96 (64.00-82.38)                        | -              | -       |                                 |
| Asia                          | 3                  | 760                                | 390                           | 55.72 (37.88-72.83)                        | 93             | <0.01   |                                 |
| Eastern Africa                | 6                  | 599                                | 368                           | 68.32 (46.63-86.56)                        | 96             | <0.01   |                                 |
| Southern Africa               | 2                  | 819                                | 716                           | 84.21 (64.78-97.34)                        | 58             | 0.12    |                                 |
| Western and Central Africa    | 6                  | 267                                | 206                           | 63.65 (30.02-91.35)                        | 96             | <0.01   |                                 |
| Income level                  |                    |                                    |                               |                                            |                |         | 0.17                            |
| Low income                    | 4                  | 273                                | 165                           | 63.68 (36.06-87.27)                        | 96             | <0.01   |                                 |
| Lower middle income           | 7                  | 795                                | 478                           | 74.10 (57.96-87.50)                        | 96             | <0.01   |                                 |
| Upper middle income           | 7                  | 1483                               | 1129                          | 76.25 (63.92-86.76)                        | 97             | <0.01   |                                 |
| High income                   | 1                  | 62                                 | 36                            | 58.06 (36.06-87.27)                        | -              | -       |                                 |
| Age group (Years)             |                    |                                    |                               |                                            |                |         | <0.01                           |
| < 7                           | 7                  | 733                                | 353                           | 55.06 (40.16-69.53)                        | 91             | <0.01   |                                 |
| ≥ 7                           | 12                 | 1515                               | 1247                          | 75.49 (58.55-89.21)                        | 94             | <0.01   |                                 |
| Antiretroviral treatment time |                    |                                    |                               |                                            |                |         | 0.77                            |
| < 3 years                     | 8                  | 1067                               | 583                           | 62.03 (46.63-76.32)                        | 94             | <0.01   |                                 |
| ≥ 3 years                     | 8                  | 519                                | 325                           | 66.61 (38.68-89.54)                        | 96             | <0.01   |                                 |
| Proportion of viral failure   |                    |                                    |                               |                                            |                |         | 0.36                            |
| 100%                          | 8                  | 861                                | 548                           | 64.41 (39.19-86.13)                        | 96             | <0.01   |                                 |
| 50%-99%                       | 6                  | 1031                               | 872                           | 78.24 (65.61-88.73)                        | 89             | <0.01   |                                 |
| < 50%                         | 3                  | 218                                | 130                           | 67.38 (24.93-97.53)                        | 98             | <0.01   |                                 |
| Unknown                       | 3                  | 534                                | 258                           | 56.20 (32.67-78.35)                        | 94             | <0.01   |                                 |
| ART regimen#                  |                    |                                    |                               |                                            |                |         | <0.01                           |
| NRTI+NNRTI                    | 4                  | 527                                | 270                           | 58.00 (29.29-84.08)                        | 97             | <0.01   |                                 |
| NRTI+NNRTI/PI                 | 10                 | 1681                               | 1304                          | 80.59 (71.86-88.08)                        | 95             | <0.01   |                                 |
| NNRTI+PI                      | 1                  | 199                                | 93                            | 46.73 (39.65-53.92)                        | -              | -       |                                 |
| NRTI+PI                       | 1                  | 10                                 | 7                             | 70.00 (34.75-93.33)                        | -              | -       |                                 |
| NRTI+NNRTI+PI                 | 3                  | 131                                | 63                            | 36.51 (0.15-88.10)                         | 97             | <0.01   |                                 |
| NRTI+NNRTI/PI/INSTI           | 1                  | 96                                 | 71                            | 73.96 (64.00-82.38)                        | -              | -       |                                 |

DR= drug resistance; WHO= World Health Organization; CDC= National Centers for Disease Control; PMTCT= the prevention of mother-to-child transmission

\*median (range).

#ART regimes are defined as the maximum proportion of all treatment among each dataset.

Several datasets are generated from the same study.

**Table S6A: Meta regression analysis for the variation of the prevalence of treatment-naive HIV infected children**

| Variables(reference)       | Univariate analysis |         |                                       |       | Multivariate analysis |                                                |  |
|----------------------------|---------------------|---------|---------------------------------------|-------|-----------------------|------------------------------------------------|--|
|                            | No. of datasets     | P value | Coefficient (95% confidence interval) | R2, % | P value               | Adjusted coefficient (95% confidence interval) |  |
| Region                     | 69                  | 0.0319  |                                       | 11.58 |                       |                                                |  |
| Asia                       | 10                  | Ref     |                                       |       | Ref                   |                                                |  |
| Eastern Africa             | 11                  | 0.1374  | 0.1659 (-0.0530-0.3849)               |       | 0.4092                | 0.0988 (-0.1358-0.3333)                        |  |
| Europe                     | 5                   | 0.8644  | -0.0238 (-0.2968-0.2493)              |       | 0.6303                | -0.0795 (-0.4030-0.2441)                       |  |
| North America              | 7                   | 0.2586  | 0.1421 (-0.1044-0.3886)               |       | 0.0252                | 0.3250 (0.0405-0.6096)                         |  |
| South America              | 8                   | 0.4367  | -0.1003 (-0.3373-0.1366)              |       | 0.3854                | -0.1089 (-0.3547-0.1370)                       |  |
| Southern Africa            | 18                  | 0.0282  | 0.2269 (0.0282-0.4256)                |       | 0.4261                | 0.0927 (-0.1356-0.3209)                        |  |
| Western and Central Africa | 10                  | 0.7423  | 0.0381 (-0.1888-0.2649)               |       | 0.7651                | 0.0526 (-0.1051-0.2104)                        |  |
| Sample Year                | 69                  | 0.1352  | 0.0088 (-0.0028-0.0204)               | 2.41  |                       |                                                |  |
| Age                        | 69                  | 0.0001  | -0.0031 (-0.0047-0.0015)              | 18.58 | 0.0005                | -0.0038 (-0.0060-0.0017)                       |  |
| Income Level               | 63                  | 0.4238  |                                       | 0.00  |                       |                                                |  |
| High income                | 11                  | Ref     |                                       |       | Ref                   |                                                |  |
| Low income                 | 15                  | 0.1765  | 0.1419 (-0.0638-0.3476)               |       |                       |                                                |  |
| Lower middle income        | 20                  | 0.2954  | 0.1044 (-0.0912-0.3001)               |       |                       |                                                |  |
| Upper middle income        | 17                  | 0.8412  | 0.0205 (-0.1802-0.2213)               |       |                       |                                                |  |
| CD4 count                  | 22                  | 0.6686  |                                       | 0.00  |                       |                                                |  |
| <500                       | 8                   | Ref     |                                       |       | Ref                   |                                                |  |
| ≥500                       | 14                  | 0.6686  | -0.0497 (-0.2774-0.1779)              |       |                       |                                                |  |
| HIV-RNA                    | 27                  | 0.1464  |                                       | 5.02  |                       |                                                |  |
| <5                         | 9                   | Ref     |                                       |       | Ref                   |                                                |  |
| ≥5                         | 18                  | 0.1464  | -0.1527 (-0.3589-0.0534)              |       |                       |                                                |  |
| PMTCT                      | 69                  | 0.0045  |                                       | 10.71 |                       |                                                |  |
| No                         | 23                  | Ref     |                                       |       | Ref                   |                                                |  |
| Yes                        | 46                  | 0.0045  | 0.1844 (0.0571-0.3116)                |       | 0.5133                | 0.0526 (-0.1051-0.2104)                        |  |
| WHO Stage                  | 10                  | 0.6442  |                                       | 0.00  |                       |                                                |  |
| ≥50%                       | 4                   | Ref     |                                       |       | Ref                   |                                                |  |
| >50%                       | 6                   | 0.6442  | -0.0385 (-0.2021-0.1250)              |       |                       |                                                |  |
| Male                       | 36                  | 0.1961  |                                       | 2.57  |                       |                                                |  |
| ≤50%                       | 23                  | 0.1961  | 0.1106 (-0.0571-0.2782)               |       | Ref                   |                                                |  |
| >50%                       | 14                  | Ref     |                                       |       |                       |                                                |  |



**Table S6B: Meta regression analysis for the variation of the prevalence of treatment-experienced HIV-infected children**

| Variables(reference)       | Univariate analysis |         |                                       | Multivariate analysis |         |                                                |
|----------------------------|---------------------|---------|---------------------------------------|-----------------------|---------|------------------------------------------------|
|                            | No. of datasets     | P value | Coefficient (95% confidence interval) | R2, %                 | P value | Adjusted coefficient (95% confidence interval) |
| Region                     | 79                  | 0.5774  |                                       | 0.00                  |         |                                                |
| Asia                       | 12                  | Ref     |                                       |                       | Ref     |                                                |
| Eastern Africa             | 17                  | 0.1818  | -0.1634 (-0.4032-0.0764)              |                       | 0.2411  | -0.1488 (-0.3975-0.1000)                       |
| Europe                     | 6                   | 0.2520  | -0.1861 (-0.5045-0.1323)              |                       | 0.1124  | -0.2540 (-0.5677-0.0596)                       |
| North America              | 7                   | 0.0816  | -0.2693 (-0.5724-0.0337)              |                       | 0.0966  | -0.2890 (-0.6299-0.0519)                       |
| South America              | 5                   | 0.8959  | -0.0225 (-0.3591-0.3142)              |                       | 0.3672  | -0.1702 (-0.5401-0.1997)                       |
| Southern Africa            | 15                  | 0.6532  | -0.0562 (-0.3015-0.1890)              |                       | 0.9033  | 0.0155 (-0.2340-0.2650)                        |
| Western and Central Africa | 17                  | 0.2535  | -0.1392 (-0.3780-0.0997)              |                       | 0.1886  | -0.1716 (-0.4274-0.0842)                       |
| Sample Year                | 81                  | 0.9517  | -0.0004 (-0.0118-0.0111)              | 0.00                  |         |                                                |
| Age                        | 78                  | 0.0198  | 0.0018 (0.0003-0.0033)                | 6.40                  | <0.0001 | 0.9477 (0.6830-1.2123)                         |
| Male                       | 72                  | 0.0866  |                                       | 3.03                  |         |                                                |
| ≤50%                       | 20                  | 0.0866  | -0.1380 (-0.2958-0.0198)              |                       | 0.5781  | -0.0535 (-0.2422-0.1351)                       |
| >50%                       | 52                  | Ref     |                                       |                       | Ref     |                                                |
| Income Level               | 75                  | 0.2395  |                                       | 1.81                  |         |                                                |
| High income                | 11                  | Ref     |                                       |                       |         |                                                |
| Low income                 | 18                  | 0.5939  | 0.0598 (-0.1600-0.2796)               |                       |         |                                                |
| Lower middle income        | 24                  | 0.8263  | 0.0234 (-0.1855-0.2323)               |                       |         |                                                |
| Upper middle income        | 22                  | 0.1025  | 0.1763 (-0.0353-0.3880)               |                       |         |                                                |
| CD4 count                  | 36                  | 0.6618  |                                       | 0.00                  |         |                                                |
| <500                       | 18                  | Ref     |                                       |                       |         |                                                |
| ≥500                       | 18                  | 0.6618  | 0.0525 (-0.1826-0.2785)               |                       |         |                                                |
| HIV-RNA                    | 41                  | 0.3510  |                                       | 0.00                  |         |                                                |
| <5                         | 24                  | Ref     |                                       |                       |         |                                                |
| ≥5                         | 17                  | 0.3510  | -0.1032 (-0.3201-0.1137)              |                       |         |                                                |
| WHO Stage                  | 35                  | 0.5425  |                                       | 0.00                  |         |                                                |
| ≤50%                       | 18                  | Ref     |                                       |                       |         |                                                |
| >50%                       | 17                  | 0.5425  | -0.0664 (-0.2799-0.1472)              | 7.40                  |         |                                                |
| Viral failure              | 81                  | 0.0307  |                                       |                       |         |                                                |
| <50%                       | 28                  | Ref     |                                       |                       | Ref     |                                                |
| 50-99%                     | 15                  | 0.2246  | 0.1209 (-0.0742-0.3159)               |                       | 0.1873  | 0.1513 (-0.0736-0.3761)                        |
| 100%                       | 28                  | 0.0094  | 0.2152 (0.0528-0.3776)                |                       | 0.1070  | 0.1505 (-0.0325-0.3336)                        |
| Unkown                     | 10                  | 0.0213  | 0.2615 (0.0390-0.4841)                |                       | 0.0607  | 0.2433 (-0.0109-0.4976)                        |
| ART duration               | 72                  | 0.6533  | 0.0006 (-0.0020-0.0032)               | 0.00                  |         |                                                |

**Figure S1: Demonstration of countries and regions included in the study**

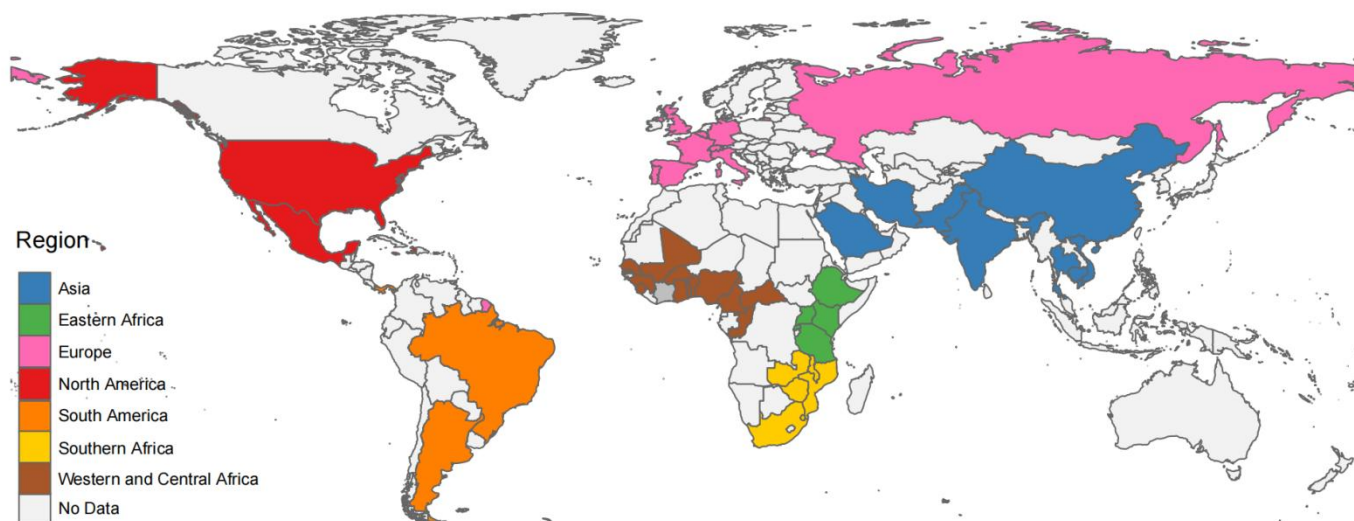

**Figure S2A: Forest plot of the drug resistance prevalence among treatment-naïve groups**

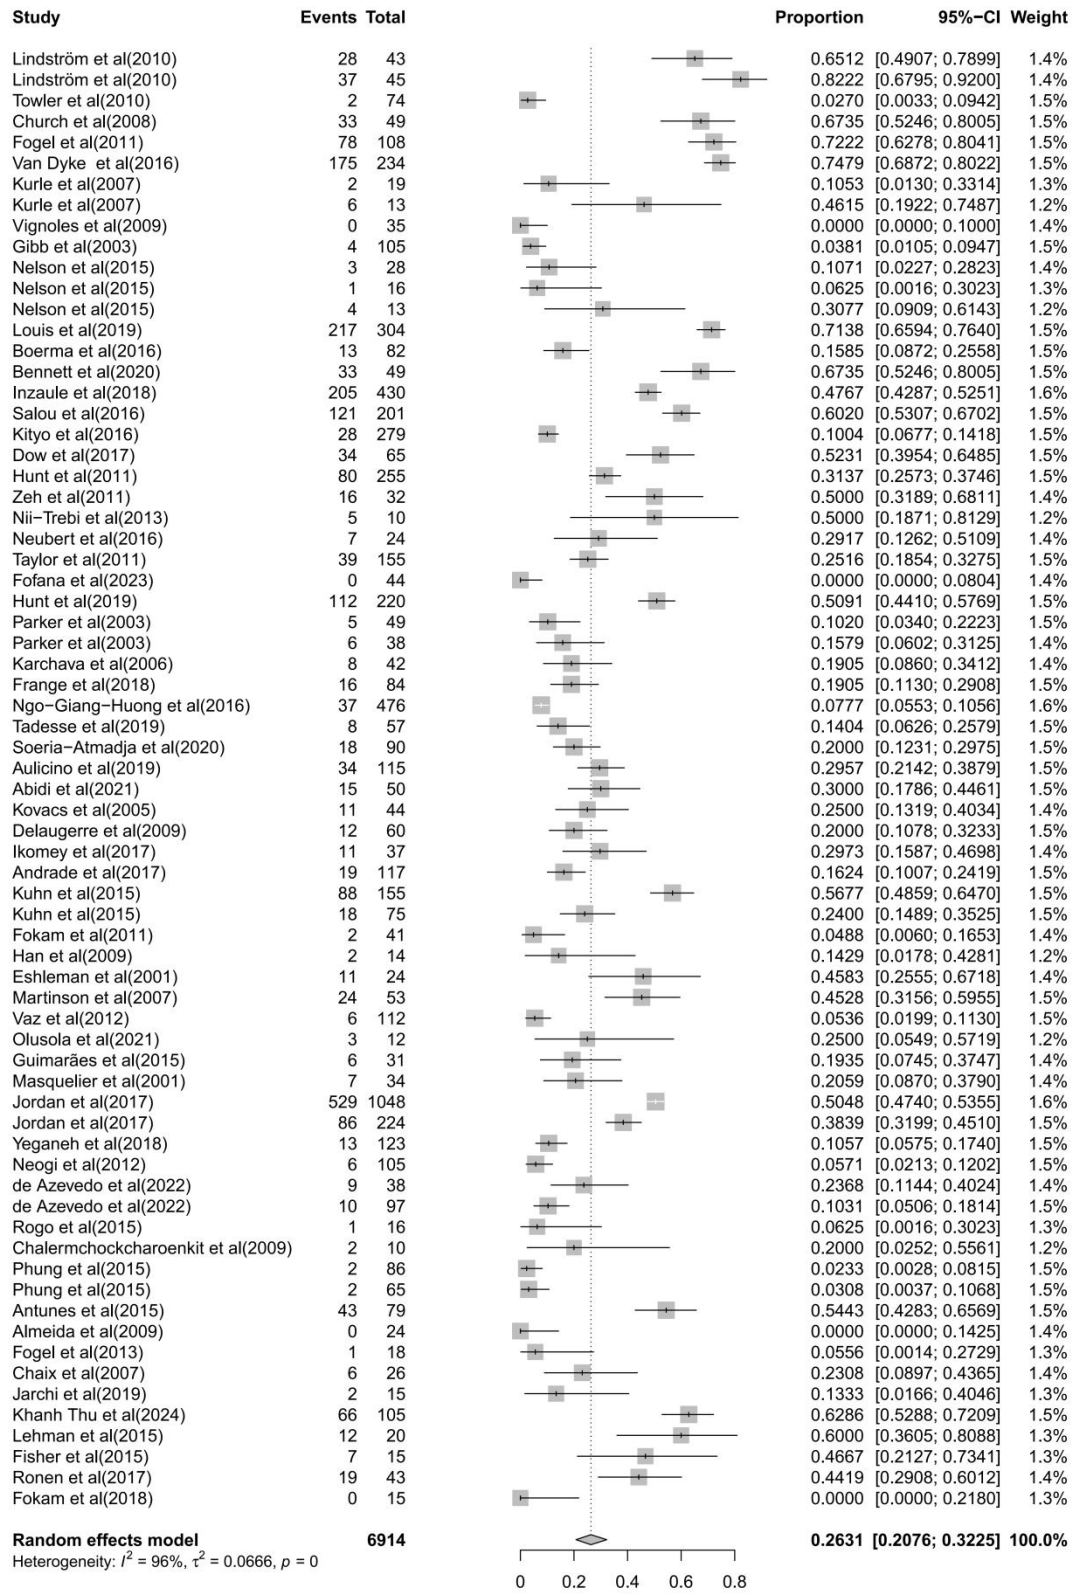

**Figure S2B: Forest plot of the drug resistance prevalence among treatment-experienced groups**

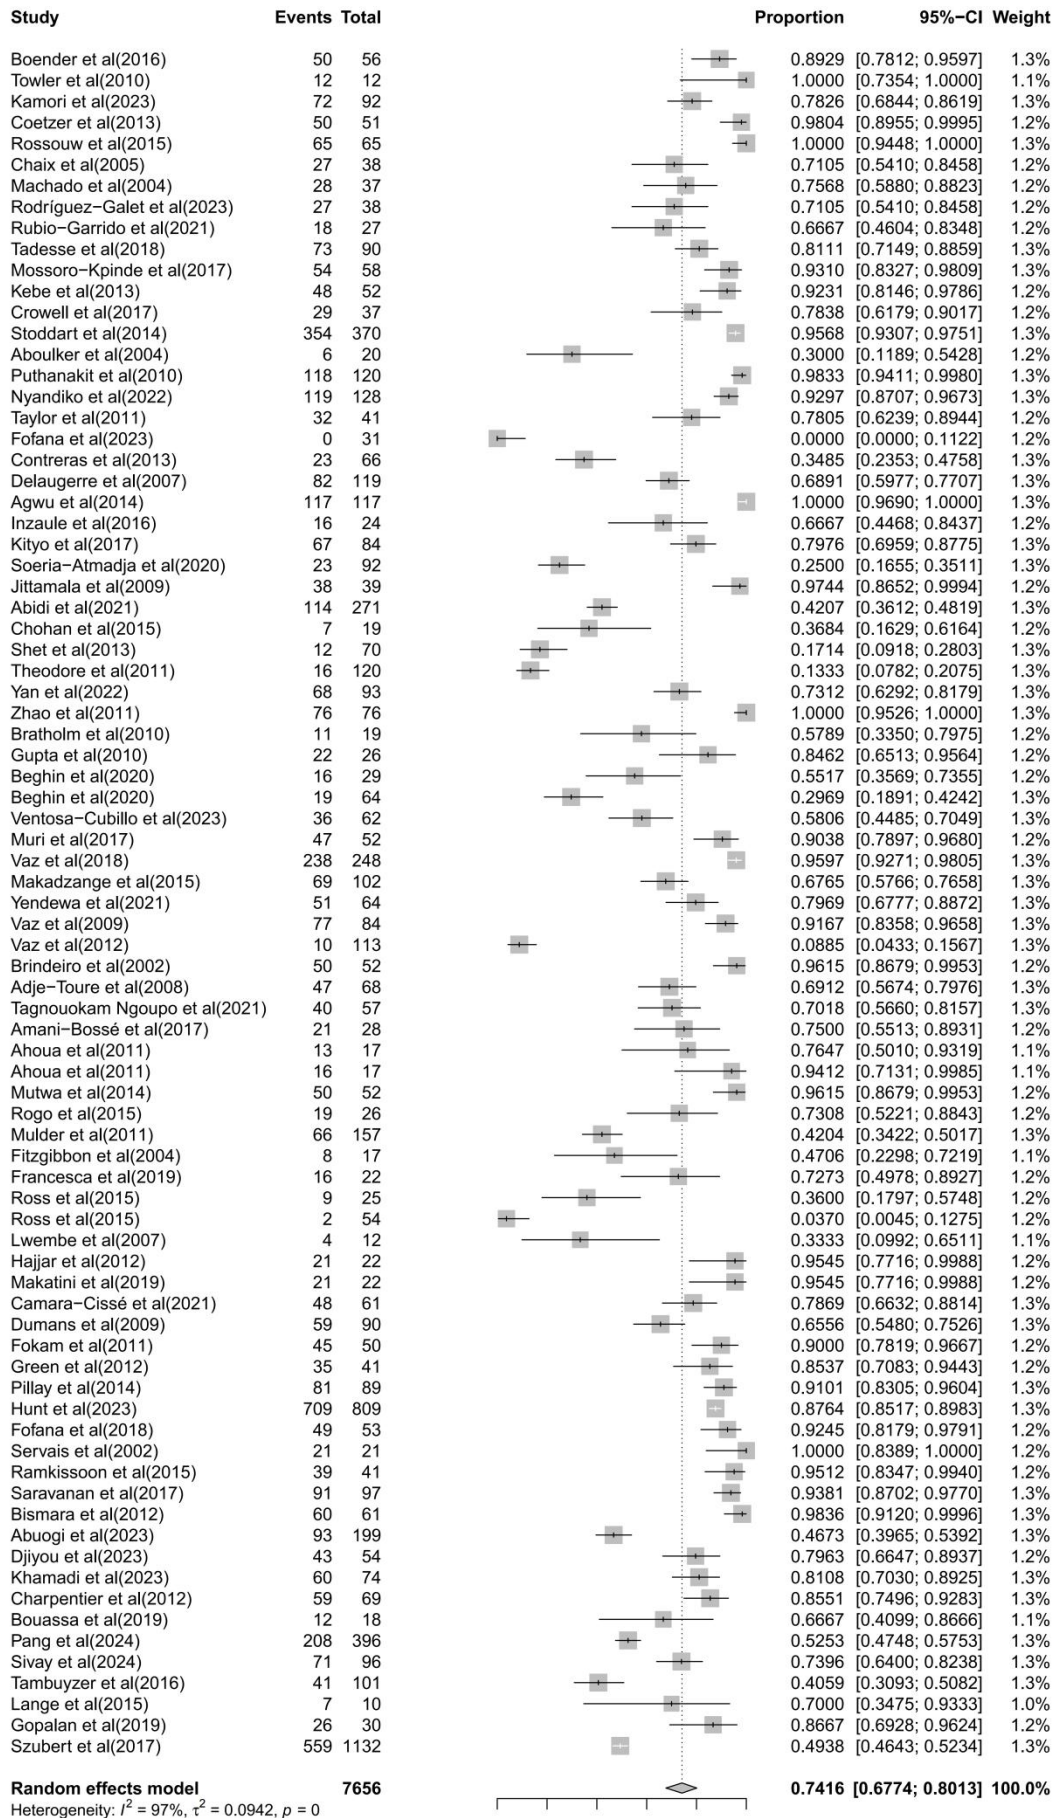

Figure S3A: Sensitivity analysis for the variation of the prevalence of treatment-naïve groups

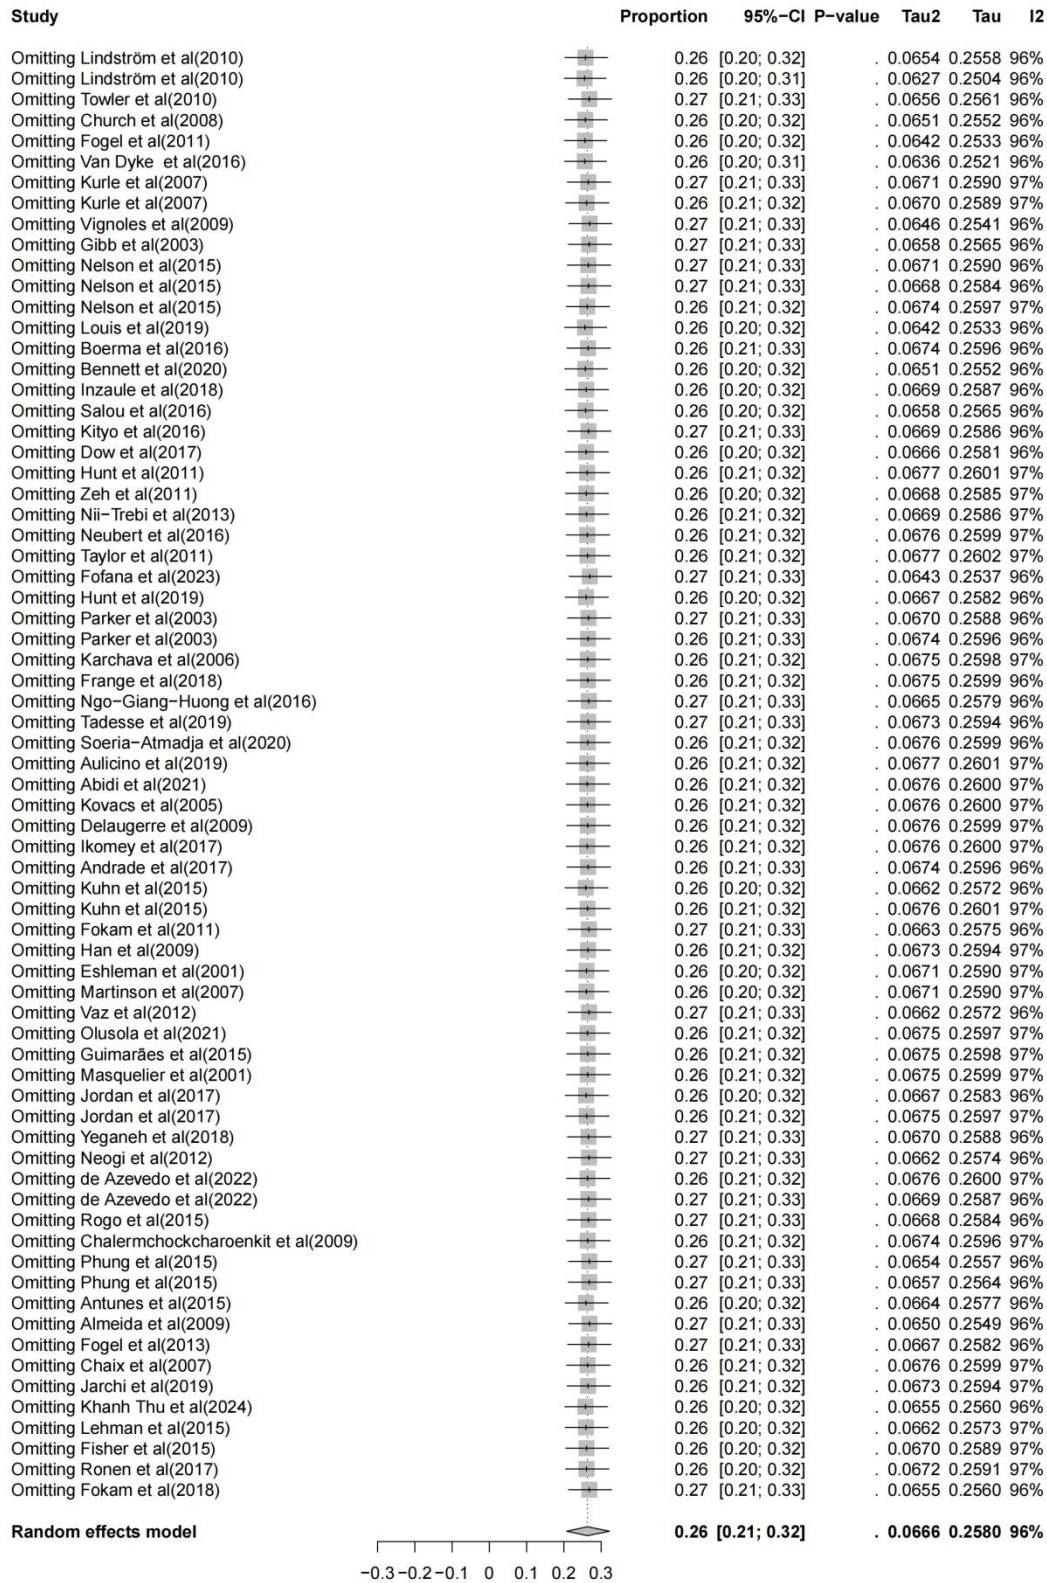

**Figure S3B: Sensitivity analysis for the variation of the prevalence of treatment-experienced groups**

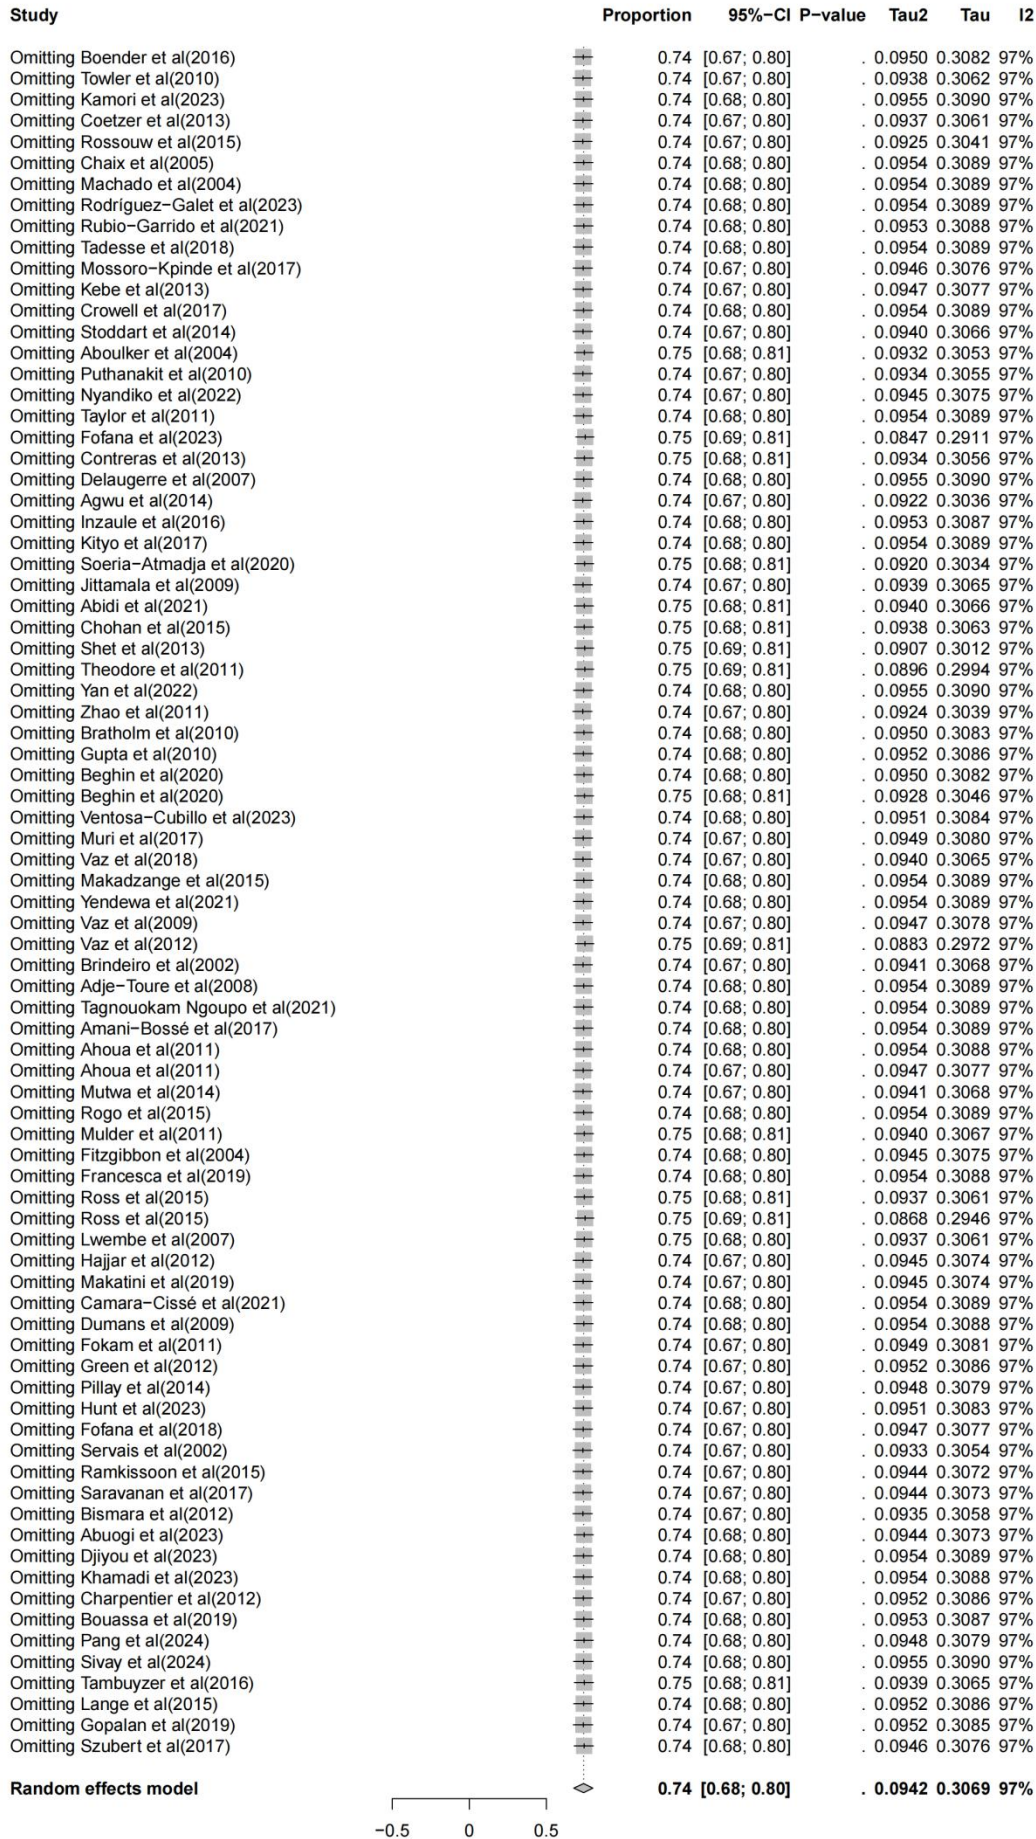

**Figure S4A: Forest plot of the NNRTI mutation prevalence among treatment-naïve groups**

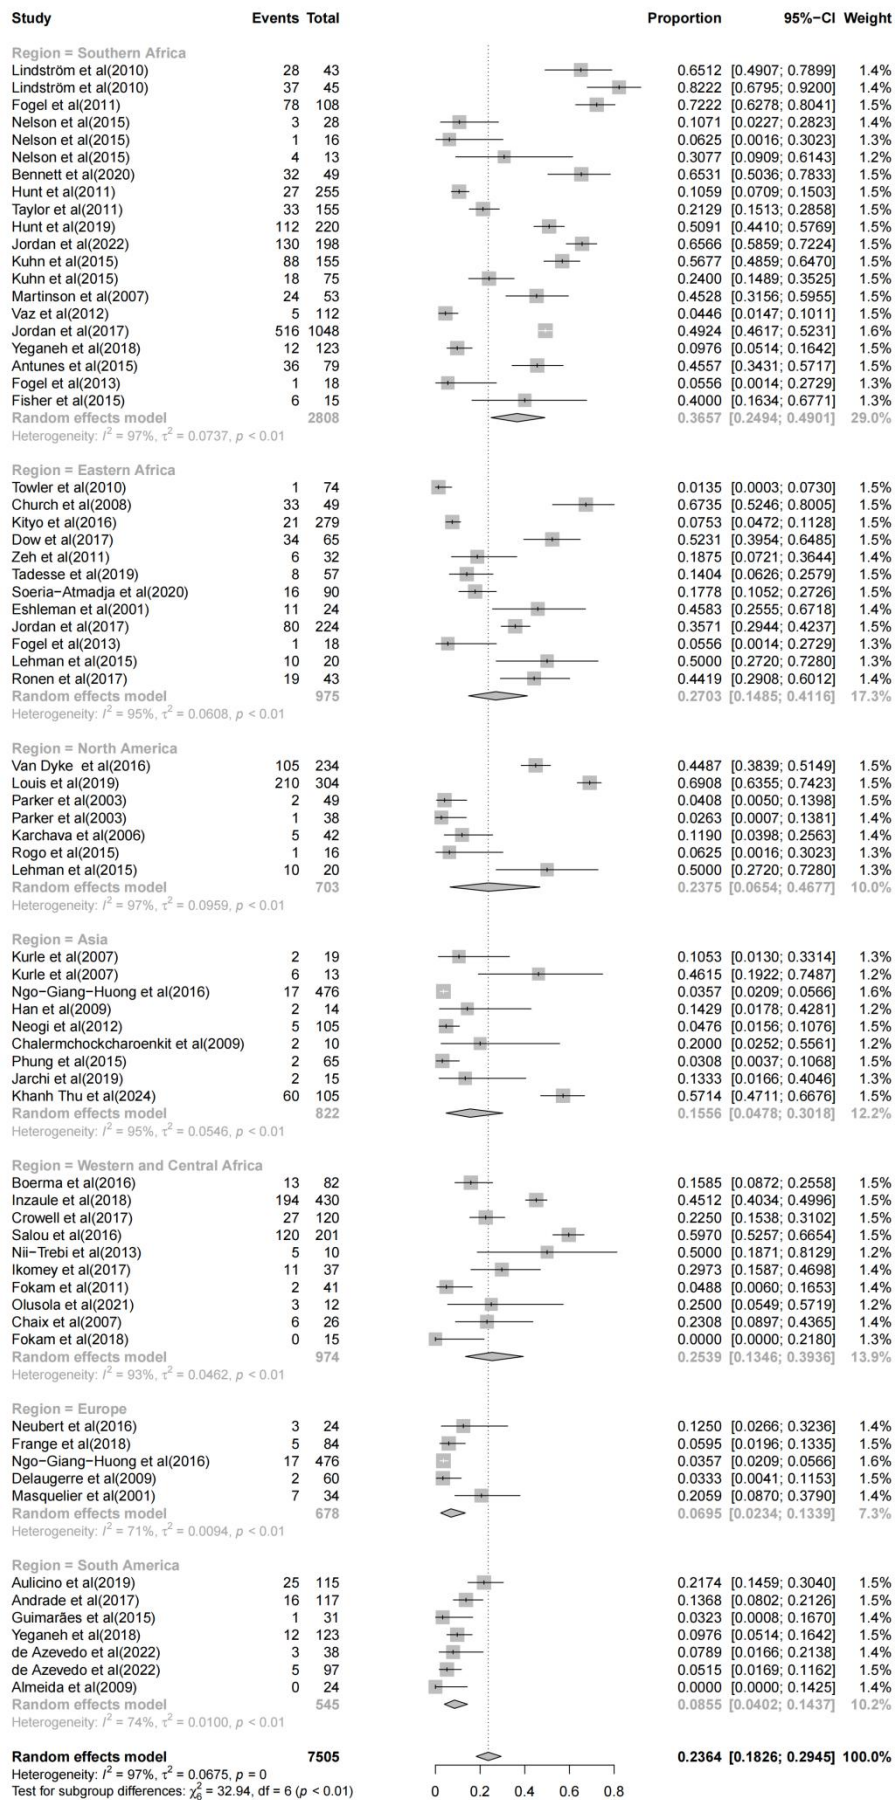

Figure S4B: Forest plot of the NNRTI mutation prevalence among treatment-experienced groups

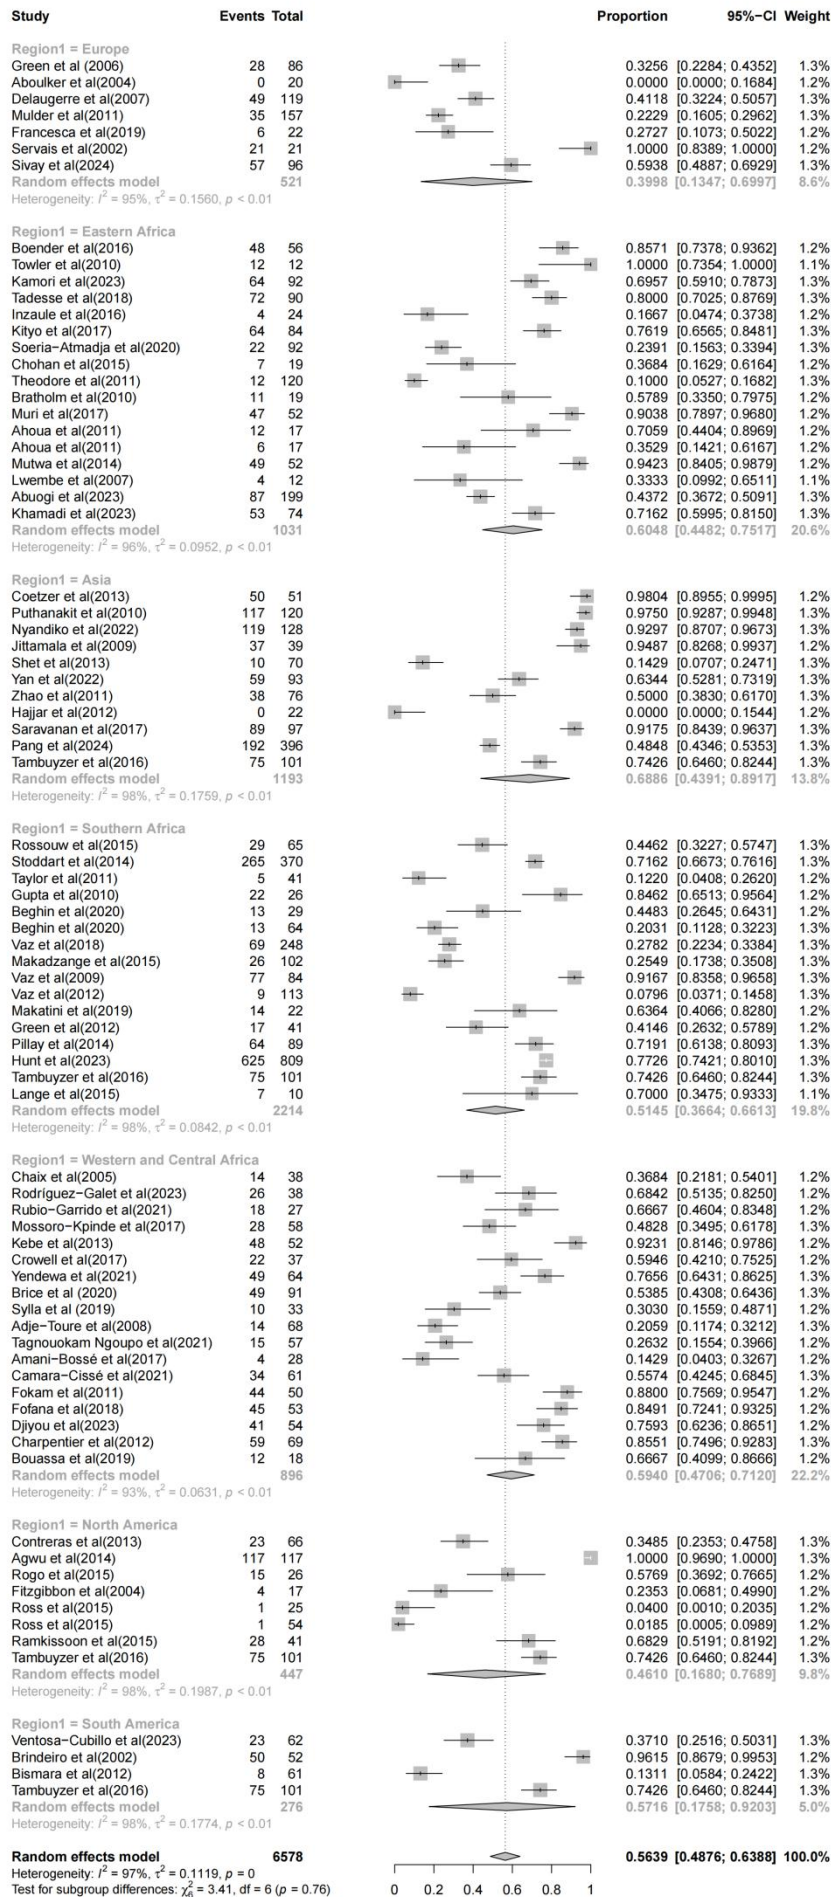



**Figure S5A: Forest plot of the NRTI mutation prevalence among treatment-naïve groups**

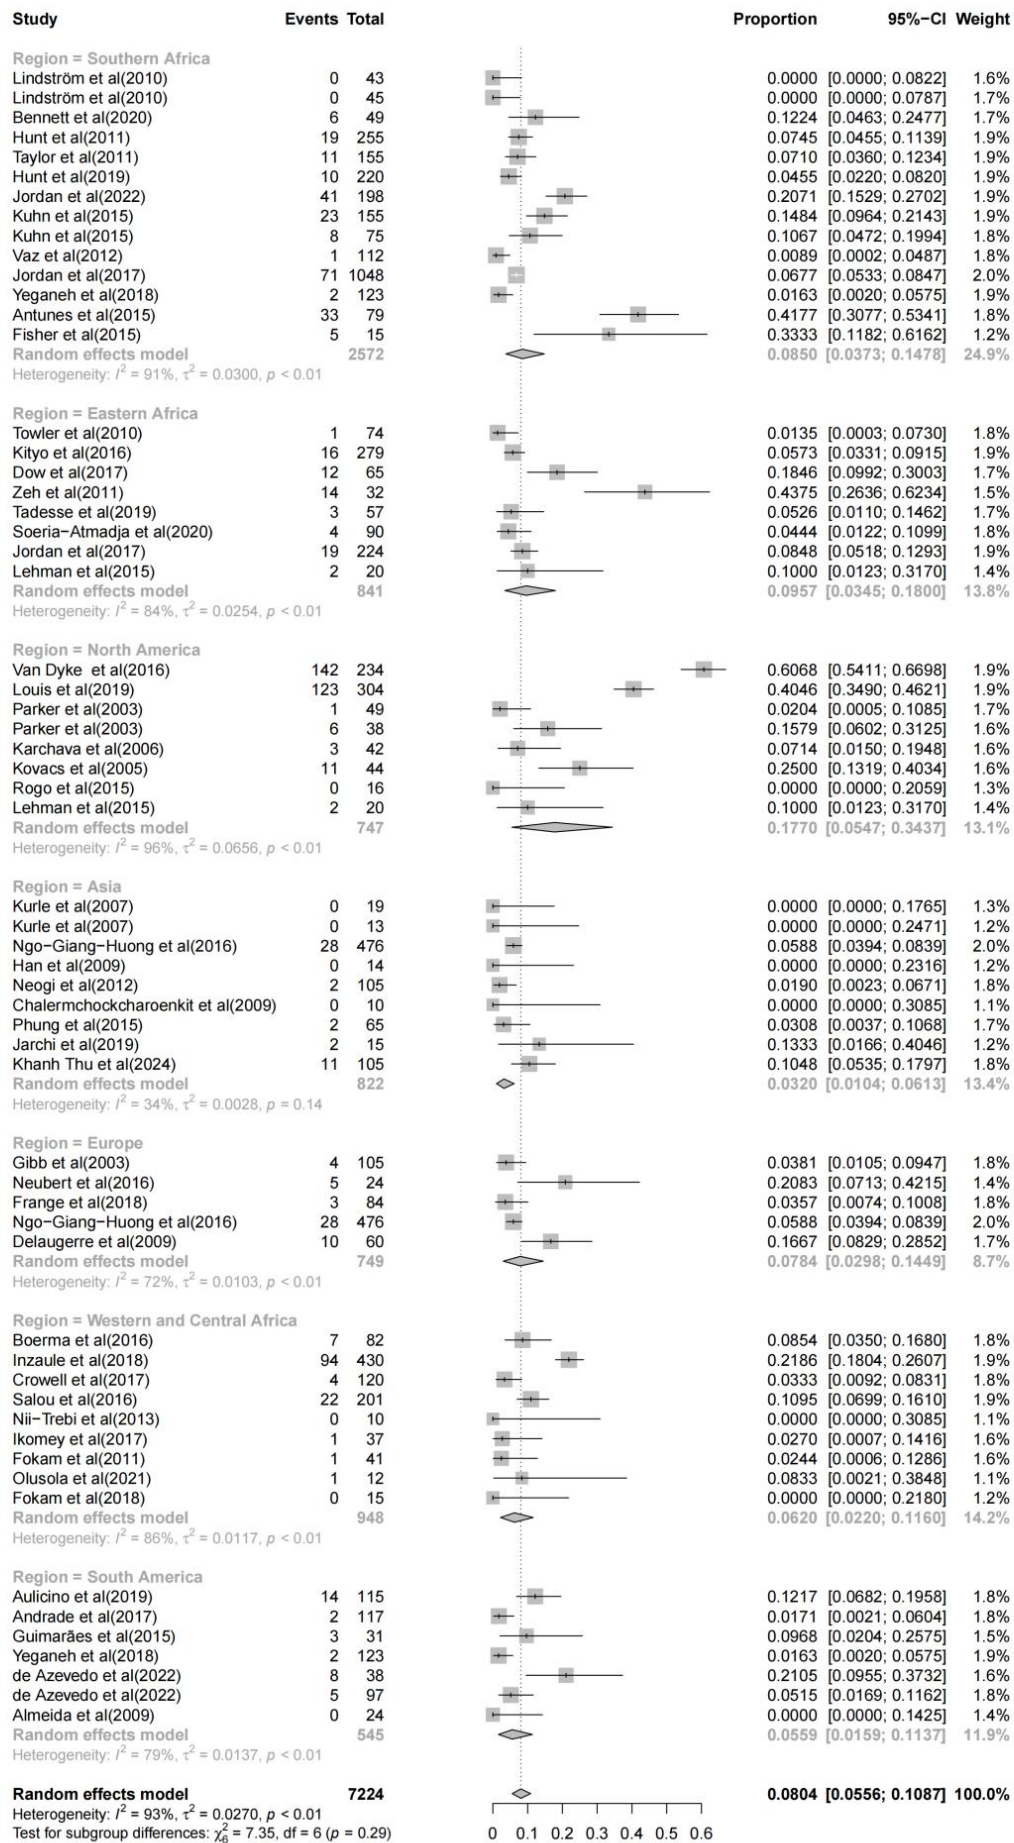

**Figure S5B: Forest plot of the NRTI mutation prevalence among treatment-experienced groups**

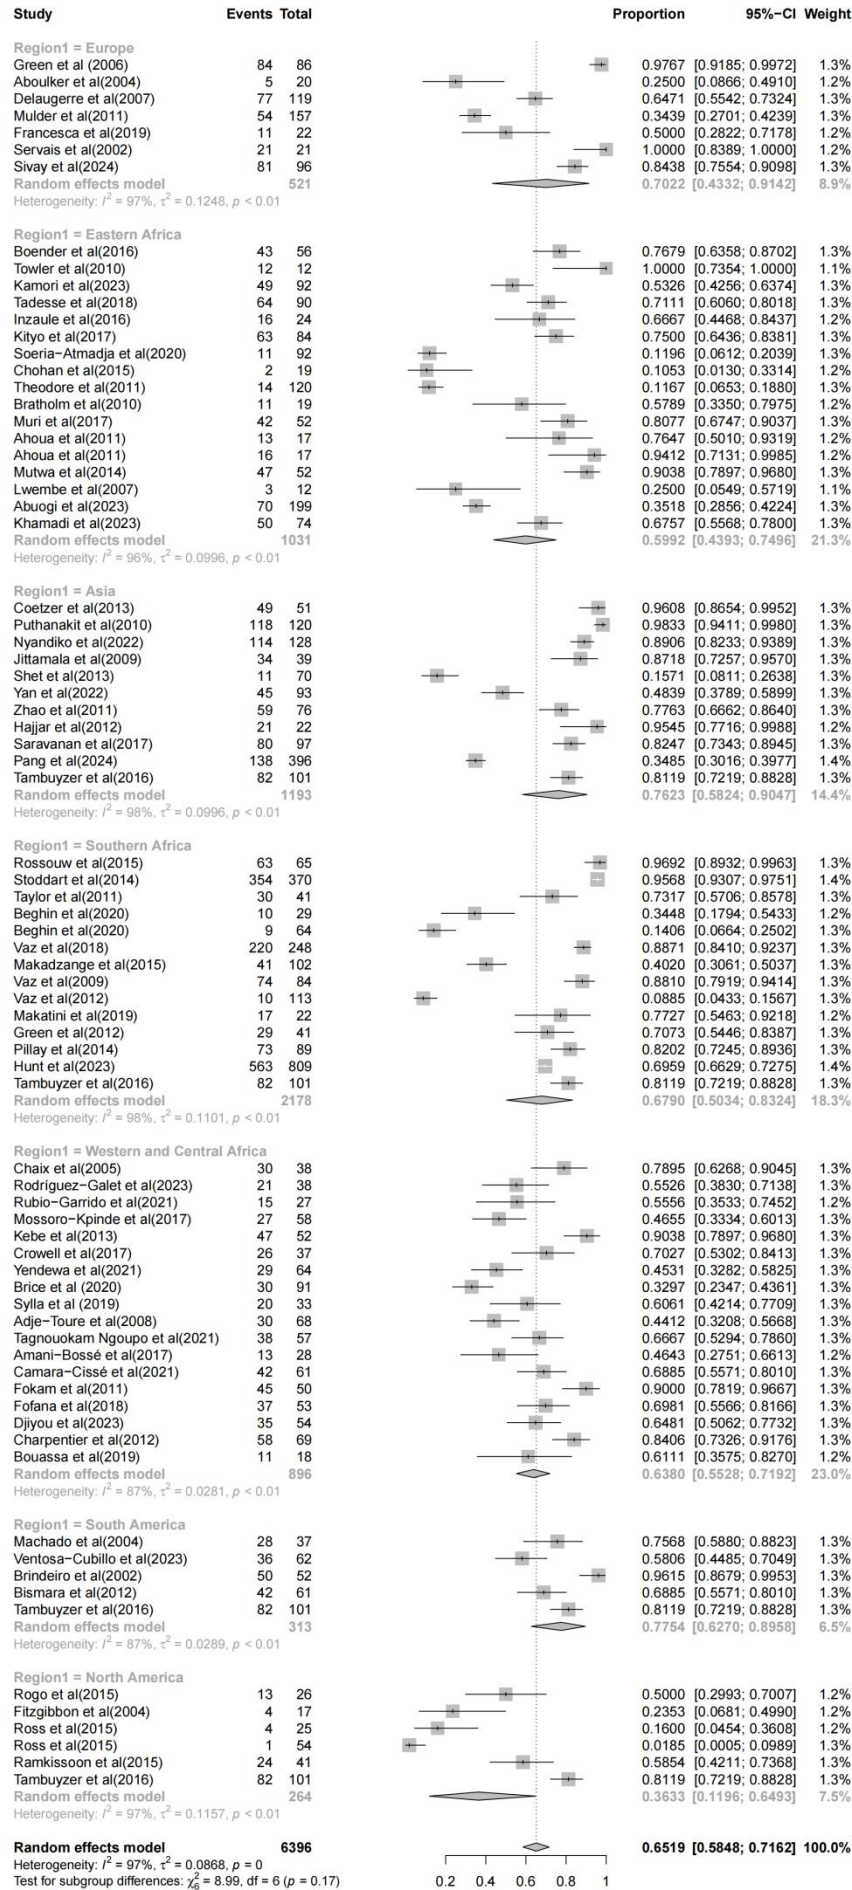

**Figure S6A: Forest plot of the PI mutation prevalence among treatment-naive groups**

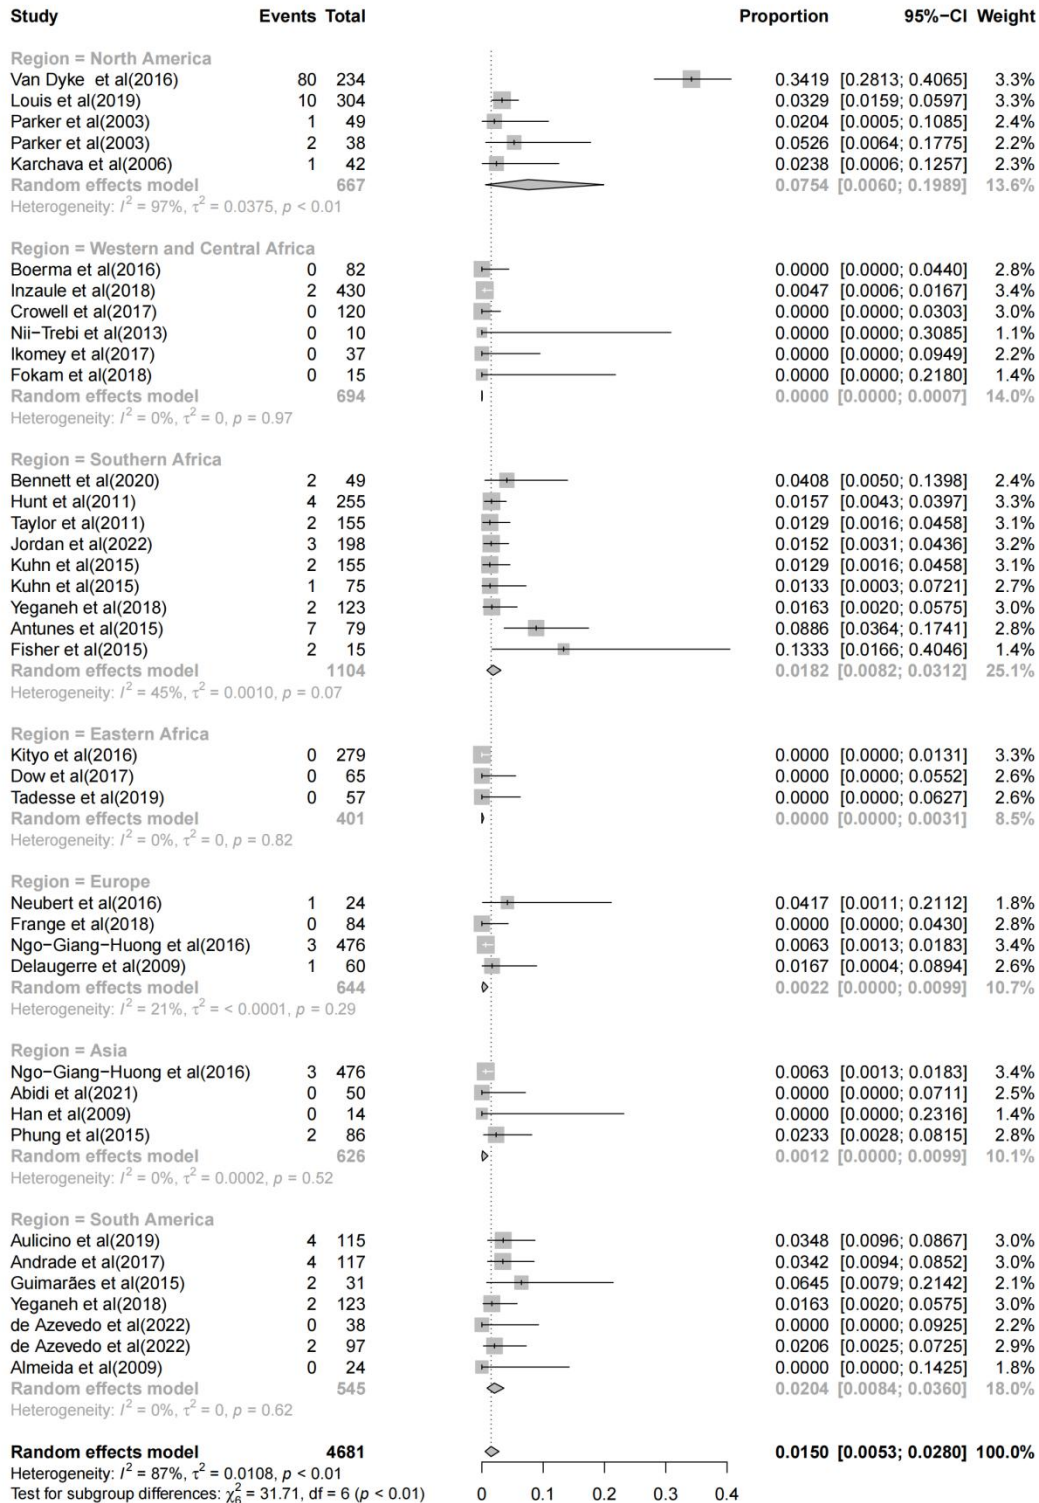

**Figure S6B: Forest plot of the PI mutation prevalence among treatment-experienced groups**

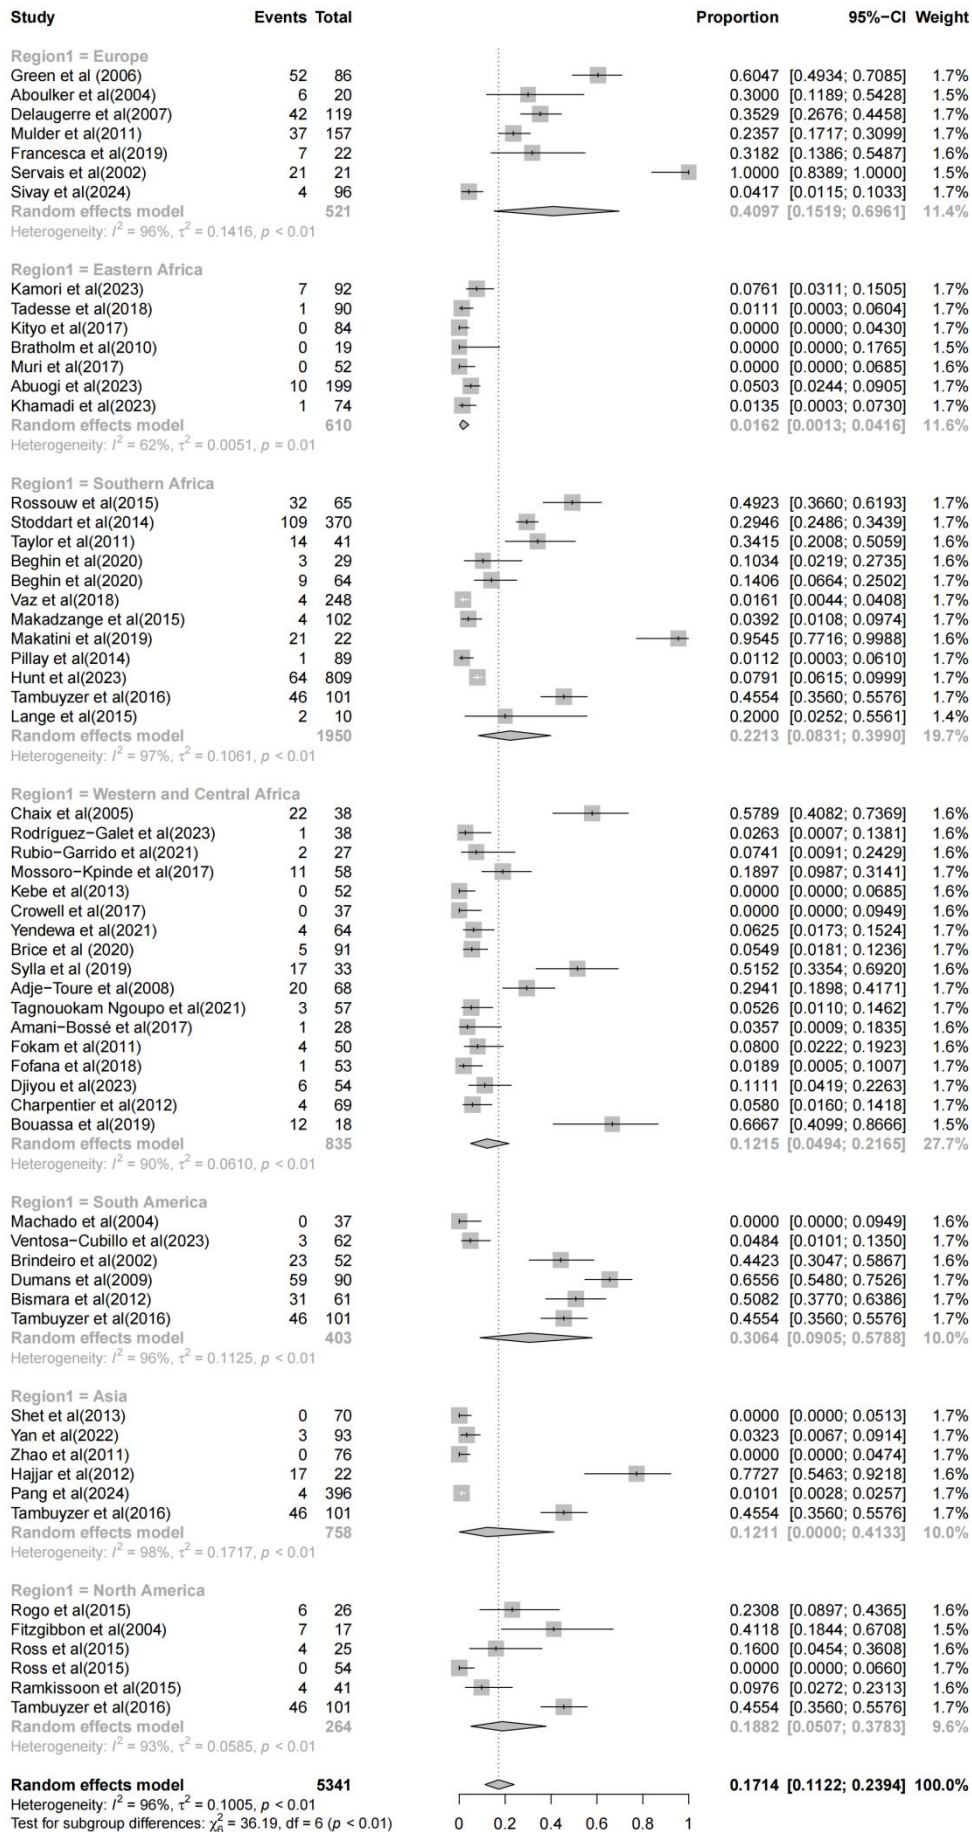

**Figure S7A: Forest plot of the INST mutation prevalence among treatment-naïve groups**

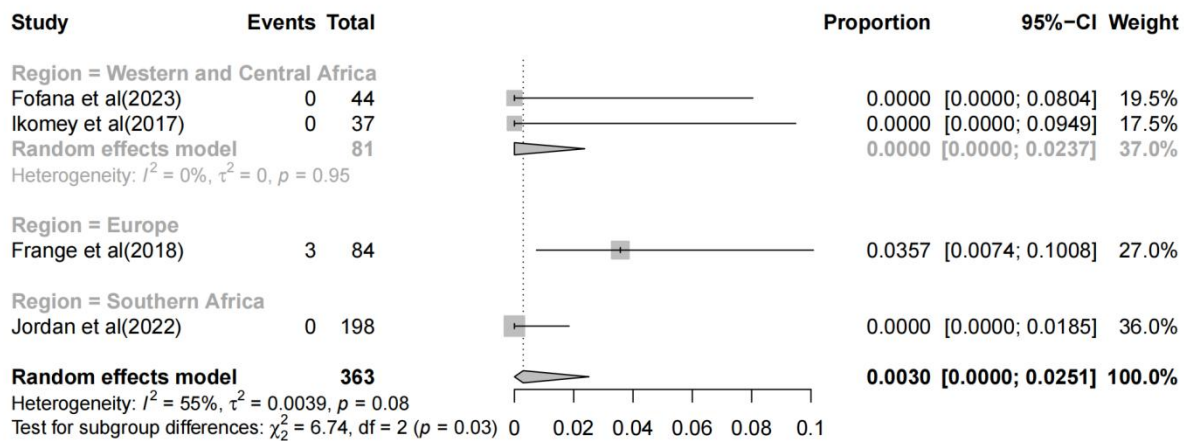

**Figure S7B: Forest plot of the INST mutation prevalence among treatment-experienced groups**

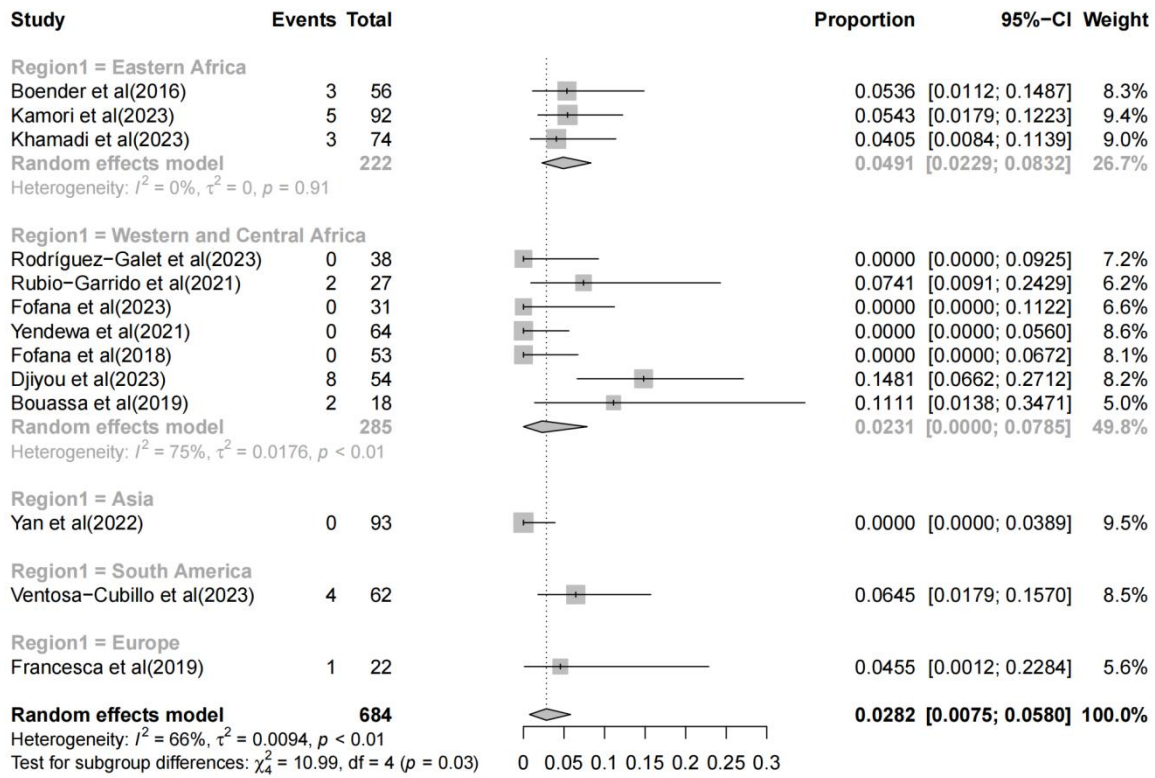

**Figure S8A: Forest plot of the dual-class mutation prevalence among treatment-naïve groups**

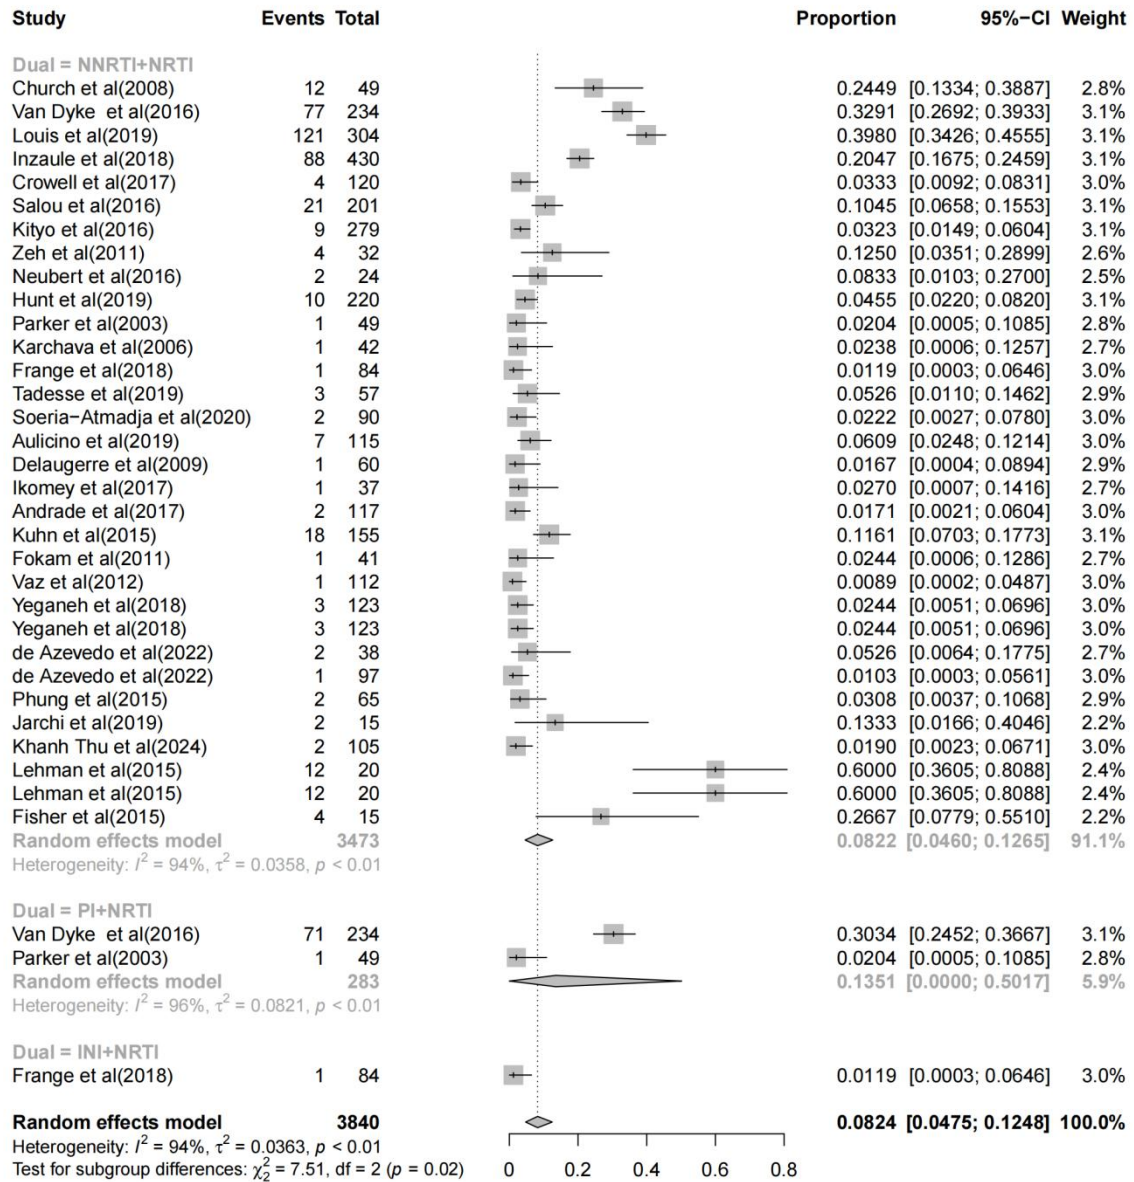

**Figure S8B: Forest plot of the dual-class mutation prevalence among treatment-experienced groups**

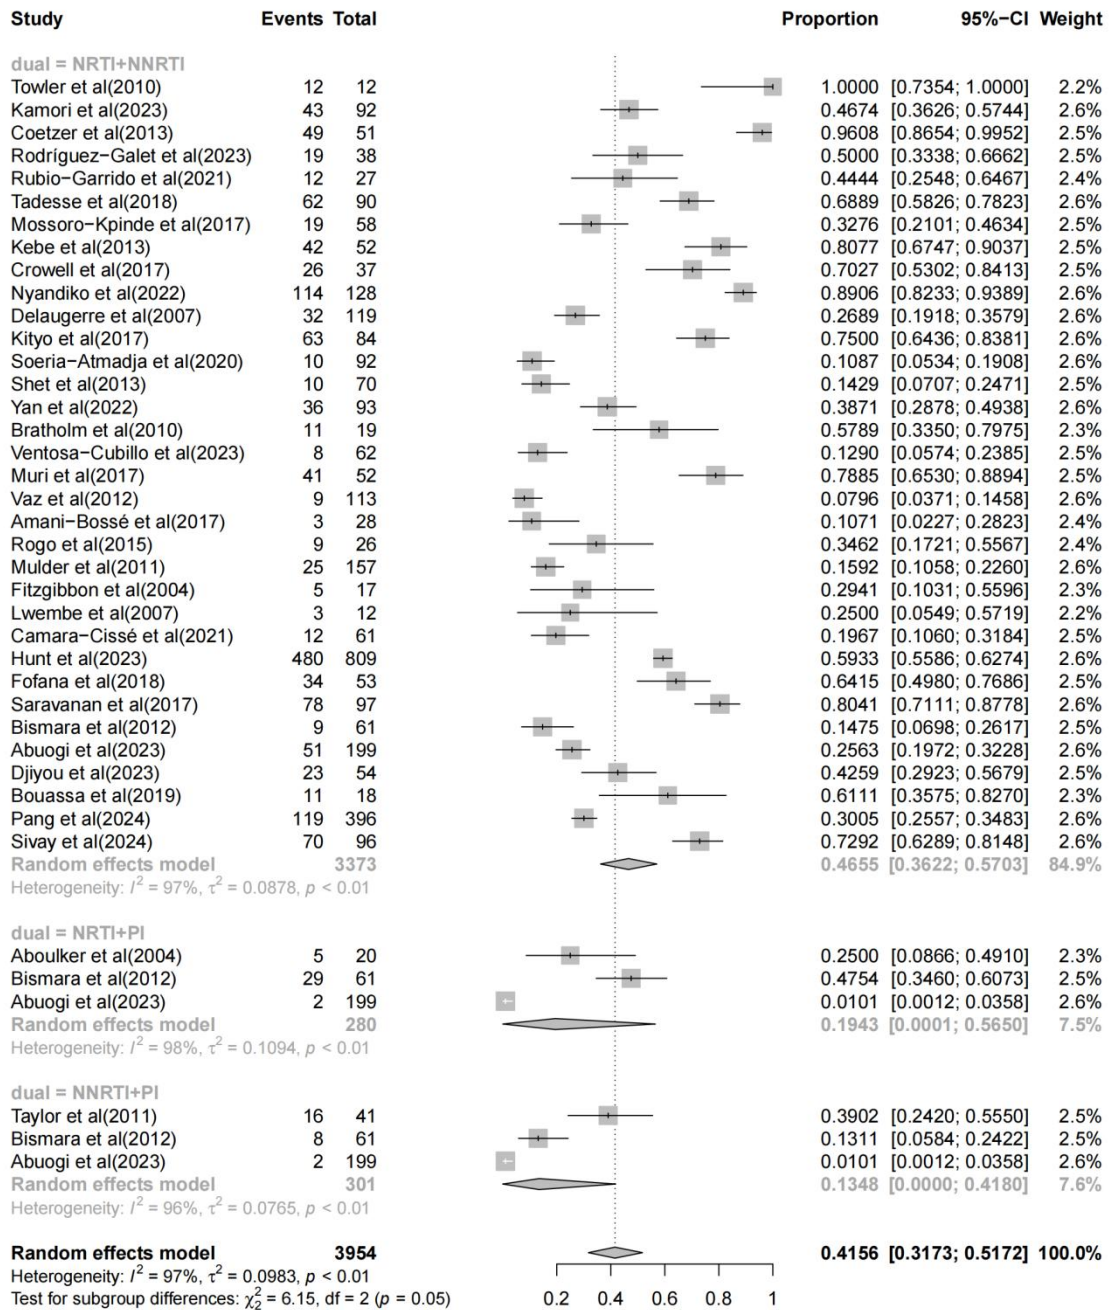



**Figure S9A: Forest plot of the triple-class mutation prevalence among treatment-naïve groups**

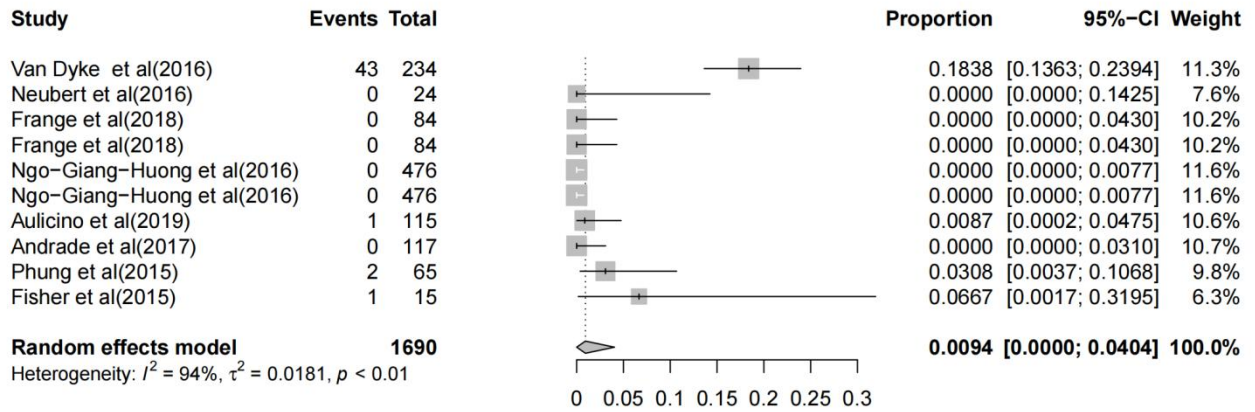

**Figure S9B: Forest plot of the triple-class mutation prevalence among treatment-experienced groups**

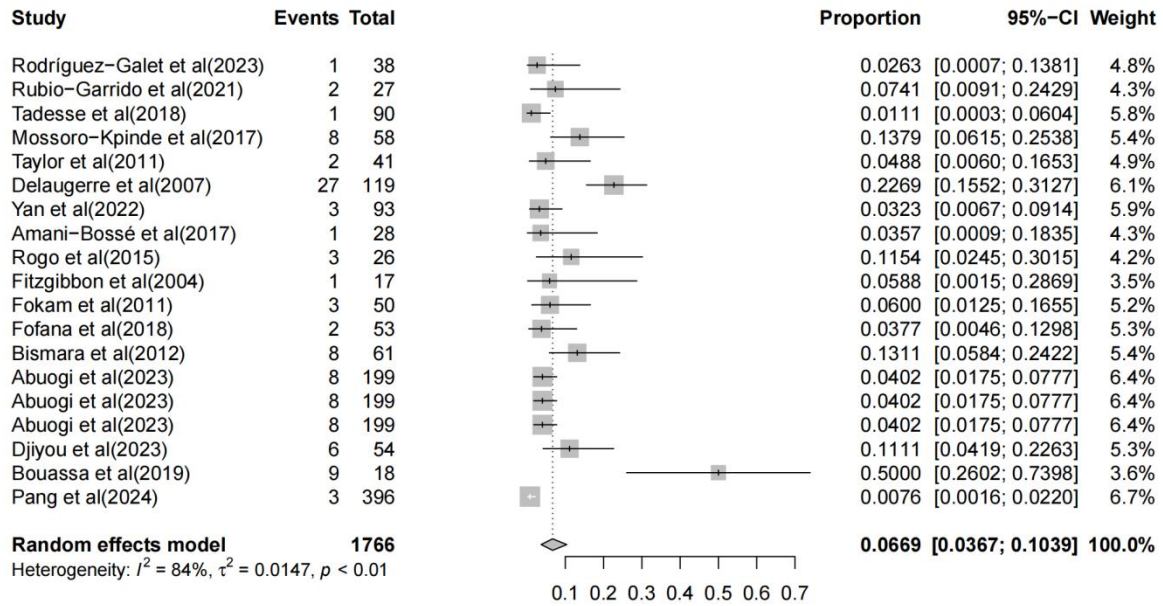

## PRISMA Checklist

| Section and Topic             | Item # | Checklist item                                                                                                                                                                                                                                                                                       | Page where item is reported |
|-------------------------------|--------|------------------------------------------------------------------------------------------------------------------------------------------------------------------------------------------------------------------------------------------------------------------------------------------------------|-----------------------------|
| <b>TITLE</b>                  |        |                                                                                                                                                                                                                                                                                                      |                             |
| Title                         | 1      | Identify the report as a systematic review.                                                                                                                                                                                                                                                          | 1                           |
| <b>ABSTRACT</b>               |        |                                                                                                                                                                                                                                                                                                      |                             |
| Abstract                      | 2      | See the PRISMA 2020 for Abstracts checklist.                                                                                                                                                                                                                                                         | 2-3                         |
| <b>INTRODUCTION</b>           |        |                                                                                                                                                                                                                                                                                                      |                             |
| Rationale                     | 3      | Describe the rationale for the review in the context of existing knowledge.                                                                                                                                                                                                                          | 5                           |
| Objectives                    | 4      | Provide an explicit statement of the objective(s) or question(s) the review addresses.                                                                                                                                                                                                               | 5-6                         |
| <b>METHODS</b>                |        |                                                                                                                                                                                                                                                                                                      |                             |
| Eligibility criteria          | 5      | Specify the inclusion and exclusion criteria for the review and how studies were grouped for the syntheses.                                                                                                                                                                                          | 6                           |
| Information sources           | 6      | Specify all databases, registers, websites, organisations, reference lists and other sources searched or consulted to identify studies. Specify the date when each source was last searched or consulted.                                                                                            | 6                           |
| Search strategy               | 7      | Present the full search strategies for all databases, registers and websites, including any filters and limits used.                                                                                                                                                                                 | 6, Table S1                 |
| Selection process             | 8      | Specify the methods used to decide whether a study met the inclusion criteria of the review, including how many reviewers screened each record and each report retrieved, whether they worked independently, and if applicable, details of automation tools used in the process.                     | 6                           |
| Data collection process       | 9      | Specify the methods used to collect data from reports, including how many reviewers collected data from each report, whether they worked independently, any processes for obtaining or confirming data from study investigators, and if applicable, details of automation tools used in the process. | 7                           |
| Data items                    | 10a    | List and define all outcomes for which data were sought. Specify whether all results that were compatible with each outcome domain in each study were sought (e.g. for all measures, time points, analyses), and if not, the methods used to decide which results to collect.                        | 7                           |
|                               | 10b    | List and define all other variables for which data were sought (e.g. participant and intervention characteristics, funding sources). Describe any assumptions made about any missing or unclear information.                                                                                         | 7                           |
| Study risk of bias assessment | 11     | Specify the methods used to assess risk of bias in the included studies, including details of the tool(s) used, how many reviewers assessed each study and whether they worked independently, and if applicable, details of automation tools used in the process.                                    | 7                           |
| Effect measures               | 12     | Specify for each outcome the effect measure(s) (e.g. risk ratio, mean difference) used in the synthesis or presentation of results.                                                                                                                                                                  | 8                           |
| Synthesis methods             | 13a    | Describe the processes used to decide which studies were eligible for each synthesis (e.g. tabulating the study intervention characteristics and comparing against the planned groups for each synthesis (item #5)).                                                                                 | 8                           |
|                               | 13b    | Describe any methods required to prepare the data for presentation or synthesis, such as handling of missing summary statistics, or data conversions.                                                                                                                                                | 8                           |
|                               | 13c    | Describe any methods used to tabulate or visually display results of individual studies and syntheses.                                                                                                                                                                                               | 8                           |
|                               | 13d    | Describe any methods used to synthesize results and provide a rationale for the choice(s). If meta-analysis was performed, describe the model(s), method(s) to identify the presence and extent of statistical heterogeneity, and software package(s) used.                                          | 8-9                         |
|                               | 13e    | Describe any methods used to explore possible causes of heterogeneity among study results (e.g. subgroup analysis, meta-regression).                                                                                                                                                                 | 8                           |
|                               | 13f    | Describe any sensitivity analyses conducted to assess robustness of the synthesized results.                                                                                                                                                                                                         | 8                           |
| Reporting bias assessment     | 14     | Describe any methods used to assess risk of bias due to missing results in a synthesis (arising from reporting biases).                                                                                                                                                                              | 7                           |
| Certainty assessment          | 15     | Describe any methods used to assess certainty (or confidence) in the body of evidence for an outcome.                                                                                                                                                                                                | 8                           |
| <b>RESULTS</b>                |        |                                                                                                                                                                                                                                                                                                      |                             |
| Study selection               | 16a    | Describe the results of the search and selection process, from the number of records identified in the search to the number of studies included in the review, ideally using a flow diagram.                                                                                                         | 9, Figure 1                 |
|                               | 16b    | Cite studies that might appear to meet the inclusion criteria, but which were excluded, and explain why they were excluded.                                                                                                                                                                          | 9                           |
| Study characteristics         | 17     | Cite each included study and present its characteristics.                                                                                                                                                                                                                                            | 9, Table 1                  |

|                                                |     |                                                                                                                                                                                                                                                                                      |                 |
|------------------------------------------------|-----|--------------------------------------------------------------------------------------------------------------------------------------------------------------------------------------------------------------------------------------------------------------------------------------|-----------------|
| Risk of bias in studies                        | 18  | Present assessments of risk of bias for each included study.                                                                                                                                                                                                                         | 9, Table S3     |
| Results of individual studies                  | 19  | For all outcomes, present, for each study: (a) summary statistics for each group (where appropriate) and (b) an effect estimate and its precision (e.g. confidence/credible interval), ideally using structured tables or plots.                                                     | 9-10, Table 2-3 |
| Results of syntheses                           | 20a | For each synthesis, briefly summarise the characteristics and risk of bias among contributing studies.                                                                                                                                                                               | 9-10            |
|                                                | 20b | Present results of all statistical syntheses conducted. If meta-analysis was done, present for each the summary estimate and its precision (e.g. confidence/credible interval) and measures of statistical heterogeneity. If comparing groups, describe the direction of the effect. | 10-12           |
|                                                | 20c | Present results of all investigations of possible causes of heterogeneity among study results.                                                                                                                                                                                       | 10-11           |
|                                                | 20d | Present results of all sensitivity analyses conducted to assess the robustness of the synthesized results.                                                                                                                                                                           | 11              |
| Reporting biases                               | 21  | Present assessments of risk of bias due to missing results (arising from reporting biases) for each synthesis assessed.                                                                                                                                                              | 10-11           |
| Certainty of evidence                          | 22  | Present assessments of certainty (or confidence) in the body of evidence for each outcome assessed.                                                                                                                                                                                  | 9-12            |
| <b>DISCUSSION</b>                              |     |                                                                                                                                                                                                                                                                                      |                 |
| Discussion                                     | 23a | Provide a general interpretation of the results in the context of other evidence.                                                                                                                                                                                                    | 12              |
|                                                | 23b | Discuss any limitations of the evidence included in the review.                                                                                                                                                                                                                      | 14-15           |
|                                                | 23c | Discuss any limitations of the review processes used.                                                                                                                                                                                                                                | 14-15           |
|                                                | 23d | Discuss implications of the results for practice, policy, and future research.                                                                                                                                                                                                       | 12-15           |
| <b>OTHER INFORMATION</b>                       |     |                                                                                                                                                                                                                                                                                      |                 |
| Registration and protocol                      | 24a | Provide registration information for the review, including register name and registration number, or state that the review was not registered.                                                                                                                                       | 7               |
|                                                | 24b | Indicate where the review protocol can be accessed, or state that a protocol was not prepared.                                                                                                                                                                                       | 7               |
|                                                | 24c | Describe and explain any amendments to information provided at registration or in the protocol.                                                                                                                                                                                      | 7               |
| Support                                        | 25  | Describe sources of financial or non-financial support for the review, and the role of the funders or sponsors in the review.                                                                                                                                                        | 9               |
| Competing interests                            | 26  | Declare any competing interests of review authors.                                                                                                                                                                                                                                   | 16              |
| Availability of data, code and other materials | 27  | Report which of the following are publicly available and where they can be found: template data collection forms; data extracted from included studies; data used for all analyses; analytic code; any other materials used in the review.                                           | 16              |

From: Page MJ, McKenzie JE, Bossuyt PM, Boutron I, Hoffmann TC, Mulrow CD, et al. The PRISMA 2020 statement: an updated guideline for reporting systematic reviews. *BMJ* 2021;372:n71. doi: 10.1136/bmj.n71
